# Supplementary material for: Influence of gastrectomy for gastric cancer treatment on faecal microbiome and metabolome profiles
Source: HighWire-hosted journal article supplement (doi:10.1136/gutjnl-2019-319188), 2020-01-16
Supplement: gutjnl-2019-319188supp006_data_supplement.xlsx [file gutjnl-2019-319188supp006_data_supplement.xlsx]

## Sheet: PERMANOVA_Species
Supplementary Table S4. PERMANOVA analysis between microbiome and metabolome based on clinical parameters, demographic data, and medical history
a. mOTU-annotated species
Metadata	Df	SumsOfSqs	MeanSqs	F.Model	R2	Pr(>F)
Status	1	1.13788	1.13788	3.99566	0.0369983	0.000999001
BMI	1	0.524042	0.524042	1.80281	0.0170393	0.028971
Age	1	0.447737	0.447737	1.53643	0.0145583	0.0759241
Gender	1	0.442461	0.442461	1.51806	0.0143867	0.0859141
SmokingStatus	2	0.74106	0.37053	1.26743	0.0247219	0.124875
DrinkingStatus	1	0.316375	0.316375	1.08097	0.010287	0.320679
complication	1	0.304806	0.304806	1.17567	0.0254608	0.258741
Serum glucose	1	0.290534	0.290534	0.995049	0.0109352	0.434565
Total_Cholesterol	1	0.376613	0.376613	1.30608	0.0146247	0.160839
HypertensionMed	1	0.29667	0.29667	1.01624	0.00976998	0.398601
Cholesterol	1	0.218506	0.218506	0.746548	0.00719588	0.773227
DiabetesMed	1	0.333387	0.333387	1.14341	0.0109791	0.280719
GoutMed	1	0.130851	0.130851	0.445769	0.00430921	0.994006
GastricAcidMedication	1	0.376821	0.376821	1.29006	0.0122524	0.187812
Analgesic	1	0.407352	0.407352	1.40053	0.013415	0.0929071
Anticoagulant	1	0.290628	0.290628	0.99534	0.00957101	0.438561
Others	1	0.184344	0.184344	0.629114	0.00607083	0.887113
LungCancer	1	0.385441	0.385441	1.32423	0.0126934	0.131868
LiverCancer	1	0.24647	0.24647	0.842871	0.0081168	0.724276
BreastCancer	1	0.300319	0.300319	1.02886	0.00989014	0.427572
UterineCancer	1	0.23229	0.23229	0.794002	0.00764979	0.83017
OtherCancers	1	0.266353	0.266353	0.911466	0.00877157	0.539461
Stroke	1	0.317246	0.317246	1.08746	0.0104476	0.373626
CardiacInfarction	1	0.229682	0.229682	0.785021	0.00756391	0.718282
Angina	1	0.333282	0.333282	1.14304	0.0109757	0.282717
Hypertension	1	0.344759	0.344759	1.18285	0.0113536	0.237762
Diabetes	1	0.207864	0.207864	0.709937	0.00684541	0.78022
Dyslipidemia	1	0.196503	0.196503	0.67088	0.00647125	0.846154
Cataract	1	0.301668	0.301668	1.03353	0.00993456	0.376623
StomachUlcer	1	0.151338	0.151338	0.515912	0.00498389	0.964036
StomachPolyps	1	0.183183	0.183183	0.625128	0.00603259	0.889111
DuodenalUlcers	1	0.77888	0.77888	2.71152	0.0256502	0.002997
ColorectalPolyps	1	0.236144	0.236144	0.807279	0.00777671	0.71029
ChronicHepatitis_LiverCirrhosis	1	0.267415	0.267415	0.915134	0.00880655	0.573427
Gallstone	1	0.458839	0.458839	1.58026	0.0151105	0.0549451
Ureteral_KidneyStones	1	0.226216	0.226216	0.773085	0.00744976	0.706294
Gout	1	0.344564	0.344564	1.18218	0.0113472	0.257742
HipFracture	1	0.409058	0.409058	1.40647	0.0134711	0.103896
Arm_wristFracture	1	0.313495	0.313495	1.07447	0.010324	0.353646
OtherDiseases	1	0.298165	0.298165	1.02141	0.00981922	0.404595
b. MetaPhlan2-annotated species
Metadata	Df	SumsOfSqs	MeanSqs	F.Model	R2	Pr(>F)
Status	1	1.24481	1.24481	4.18377	0.0386728	0.000999001
BMI	1	0.771282	0.771282	2.55318	0.0239616	0.000999001
Age	1	0.508326	0.508326	1.66875	0.0157923	0.02997
Gender	1	0.388229	0.388229	1.26968	0.0120612	0.16983
SmokingStatus	2	0.704197	0.352098	1.14637	0.0224136	0.221778
DrinkingStatus	1	0.32785	0.32785	1.07018	0.0101854	0.333666
complication	1	0.27433	0.27433	1.01599	0.0220791	0.444555
Serum glucose	1	0.301999	0.301999	0.988913	0.0108685	0.45954
Total_Cholesterol	1	0.43328	0.43328	1.4403	0.0161035	0.0719281
HypertensionMed	1	0.365724	0.365724	1.19976	0.0115141	0.220779
Cholesterol	1	0.248975	0.248975	0.813742	0.00783848	0.736264
DiabetesMed	1	0.263525	0.263525	0.861693	0.00829655	0.65035
GoutMed	1	0.152101	0.152101	0.495598	0.00478859	0.993007
GastricAcidMedication	1	0.420886	0.420886	1.3779	0.0130758	0.127872
Analgesic	1	0.38983	0.38983	1.27983	0.012273	0.120879
Anticoagulant	1	0.280266	0.280266	0.916921	0.0088236	0.562438
Others	1	0.234057	0.234057	0.76462	0.00736879	0.786214
LungCancer	1	0.421861	0.421861	1.3864	0.0132814	0.0879121
LiverCancer	1	0.27173	0.27173	0.888755	0.00855487	0.594406
BreastCancer	1	0.316812	0.316812	1.03769	0.00997419	0.398601
UterineCancer	1	0.261526	0.261526	0.855104	0.00823362	0.686314
OtherCancers	1	0.272204	0.272204	0.890317	0.00856977	0.608392
Stroke	1	0.320267	0.320267	1.04912	0.0100829	0.400599
CardiacInfarction	1	0.24904	0.24904	0.813955	0.00784052	0.721279
Angina	1	0.321325	0.321325	1.05262	0.0101162	0.36963
Hypertension	1	0.345437	0.345437	1.13248	0.0108754	0.292707
Diabetes	1	0.209464	0.209464	0.683747	0.00659454	0.86014
Dyslipidemia	1	0.257811	0.257811	0.842855	0.00811664	0.662338
Cataract	1	0.264373	0.264373	0.86449	0.00832325	0.631369
StomachUlcer	1	0.175686	0.175686	0.572874	0.00553112	0.965035
StomachPolyps	1	0.192726	0.192726	0.628776	0.00606758	0.922078
DuodenalUlcers	1	0.687557	0.687557	2.2789	0.0216463	0.003996
ColorectalPolyps	1	0.332422	0.332422	1.08936	0.0104656	0.362637
ChronicHepatitis_LiverCirrhosis	1	0.307461	0.307461	1.00676	0.00967979	0.430569
Gallstone	1	0.466251	0.466251	1.53446	0.014679	0.045954
Ureteral_KidneyStones	1	0.263538	0.263538	0.861737	0.00829696	0.639361
Gout	1	0.333007	0.333007	1.0913	0.010484	0.351648
HipFracture	1	0.402483	0.402483	1.3219	0.0126713	0.11988
Arm_wristFracture	1	0.385212	0.385212	1.26448	0.0121276	0.173826
OtherDiseases	1	0.295856	0.295856	0.968406	0.00931442	0.488511
c. Metabolome profiles
Metadata	Df	SumsOfSqs	MeanSqs	F.Model	R2	Pr(>F)
Status	1	0.803887	0.803887	6.50479	0.0647212	0.000999001
BMI	1	0.248386	0.248386	1.91814	0.0199977	0.0699301
Age	1	0.105303	0.105303	0.803747	0.00847801	0.516484
Gender	1	0.266153	0.266153	2.05835	0.0214281	0.0559441
SmokingStatus	2	0.411042	0.205521	1.58481	0.0340198	0.106893
DrinkingStatus	1	0.185866	0.185866	1.428	0.0149642	0.150849
complication	1	0.23203	0.23203	1.99649	0.0499166	0.110889
Serum glucose	1	0.160591	0.160591	1.23127	0.0147934	0.252747
Total_Cholesterol	1	0.220919	0.220919	1.69493	0.0207471	0.131868
HypertensionMed	1	0.0966702	0.0966702	0.741138	0.00790622	0.575425
Cholesterol	1	0.0549137	0.0549137	0.41956	0.00449114	0.897103
DiabetesMed	1	0.151746	0.151746	1.16869	0.0124106	0.292707
GoutMed	1	0.121811	0.121811	0.935824	0.00996238	0.451548
GastricAcidMedication	1	0.0979938	0.0979938	0.747512	0.00788952	0.573427
Analgesic	1	0.111885	0.111885	0.858862	0.00915057	0.478521
Anticoagulant	1	0.0610424	0.0610424	0.466621	0.00499238	0.85015
Others	1	0.0687181	0.0687181	0.525627	0.00562014	0.813187
LungCancer	1	0.127353	0.127353	0.978852	0.0104157	0.432567
LiverCancer	1	0.13113	0.13113	1.00819	0.0107245	0.297702
BreastCancer	1	0.0514792	0.0514792	0.393209	0.00421025	0.903097
UterineCancer	1	0.0603308	0.0603308	0.461154	0.00493418	0.938062
OtherCancers	1	0.156296	0.156296	1.20419	0.0127827	0.26973
Stroke	1	0.226081	0.226081	1.75198	0.0184902	0.108891
CardiacInfarction	1	0.135751	0.135751	1.04412	0.0111025	0.364635
Angina	1	0.0324034	0.0324034	0.247117	0.00265013	0.98002
Hypertension	1	0.116017	0.116017	0.890881	0.00948848	0.443556
Diabetes	1	0.221408	0.221408	1.71509	0.0181079	0.126873
Dyslipidemia	1	0.161258	0.161258	1.24292	0.0131885	0.247752
Cataract	1	0.118636	0.118636	0.911191	0.00970269	0.43956
StomachUlcer	1	0.0617907	0.0617907	0.47237	0.00505358	0.84016
StomachPolyps	1	0.0903235	0.0903235	0.692117	0.00738714	0.648352
DuodenalUlcers	1	0.0616047	0.0616047	0.470941	0.00503836	0.846154
ColorectalPolyps	1	0.0995635	0.0995635	0.763502	0.00814285	0.54046
ChronicHepatitis_LiverCirrhosis	1	0.0776787	0.0776787	0.594605	0.00635299	0.815185
Gallstone	1	0.139847	0.139847	1.07599	0.0114375	0.350649
Ureteral_KidneyStones	1	0.0741542	0.0741542	0.567462	0.00606474	0.767233
Gout	1	0.107537	0.107537	0.825187	0.00879494	0.502498
HipFracture	1	0.155517	0.155517	1.19811	0.012719	0.297702
Arm_wristFracture	1	0.476154	0.476154	3.7684	0.0389425	0.00899101
OtherDiseases	1	0.0770276	0.0770276	0.58959	0.00629973	0.749251
e. PERMANOVA analysis on subsets of gastrectomy participants
mOTU-annotated species
Metadata	Df	SumsOfSqs	MeanSqs	F.Model	R2	Pr(>F)
Surgery_Type	1	0.406118	0.406118	1.57818	0.0318321	0.0709291
Reconstruction	4	1.43602	0.359005	1.4325	0.122619	0.014985
Dumping_Syndrome	1	0.363536	0.363536	1.40785	0.0284945	0.134865
Hypertension	1	0.224486	0.224486	0.859715	0.0175956	0.586414
Cholesterol	1	0.301286	0.301286	1.16095	0.0236153	0.243756
DiabetesMed	1	0.169367	0.169367	0.645783	0.0132752	0.858142
GastricAcidMedication	1	0.495931	0.495931	1.94131	0.0388718	0.01998
Analgesic	1	0.311139	0.311139	1.19986	0.0243875	0.245754
Anticoagulant	1	0.189225	0.189225	0.72264	0.0148317	0.766234
Others	1	0.192138	0.192138	0.733935	0.01506	0.769231
LungCancer	1	0.38042	0.38042	1.47525	0.0298179	0.021978
BreastCancer	1	0.184675	0.184675	0.705009	0.0144751	0.811189
OtherCancers	1	0.24119	0.24119	0.924917	0.0189048	0.579421
Stroke	1	0.338458	0.338458	1.30809	0.0265288	0.164835
CardiacInfarction	1	0.248492	0.248492	0.953476	0.0194772	0.54046
Angina	1	0.311577	0.311577	1.2016	0.0244219	0.25974
Hypertension	1	0.224486	0.224486	0.859715	0.0175956	0.586414
Diabetes	1	0.294883	0.294883	1.13569	0.0231133	0.278721
Dyslipidemia	1	0.213528	0.213528	0.817034	0.0167367	0.665335
Cataract	1	0.360344	0.360344	1.39513	0.0282443	0.141858
StomachUlcer	1	0.277053	0.277053	1.0655	0.0217158	0.350649
StomachPolyps	1	0.202997	0.202997	0.776088	0.0159112	0.705295
DuodenalUlcers	1	0.373658	0.373658	1.44823	0.0292879	0.0869131
ColorectalPolyps	1	0.22818	0.22818	0.874117	0.0178851	0.565435
Gallstone	1	0.371749	0.371749	1.44061	0.0291382	0.0959041
Ureteral_KidneyStones	1	0.239542	0.239542	0.918477	0.0187757	0.554446
Gout	1	0.257369	0.257369	0.988238	0.020173	0.432567
Arm_wristFracture	1	0.302641	0.302641	1.1663	0.0237215	0.258741
OtherDiseases	1	0.175697	0.175697	0.670259	0.0137714	0.839161
MetaPhlan2-annotated species
Metadata	Df	SumsOfSqs	MeanSqs	F.Model	R2	Pr(>F)
Surgery_Type	1	0.445778	0.445778	1.67158	0.0336527	0.035964
Reconstruction	4	1.4772	0.3693	1.41659	0.121423	0.011988
Dumping_Syndrome	1	0.355666	0.355666	1.32436	0.02685	0.163836
Hypertension	1	0.270623	0.270623	1.00109	0.0204299	0.434565
Cholesterol	1	0.358396	0.358396	1.3348	0.027056	0.121878
DiabetesMed	1	0.217964	0.217964	0.803033	0.0164546	0.728272
GastricAcidMedication	1	0.356633	0.356633	1.32806	0.026923	0.134865
Analgesic	1	0.31421	0.31421	1.16624	0.0237204	0.224775
Anticoagulant	1	0.181301	0.181301	0.666083	0.0136868	0.868132
Others	1	0.236903	0.236903	0.874077	0.0178843	0.615385
LungCancer	1	0.442792	0.442792	1.66	0.0334273	0.021978
BreastCancer	1	0.204625	0.204625	0.753117	0.0154476	0.798202
OtherCancers	1	0.237119	0.237119	0.87489	0.0179006	0.661339
Stroke	1	0.33649	0.33649	1.25109	0.0254023	0.181818
CardiacInfarction	1	0.209147	0.209147	0.770027	0.0157889	0.835165
Angina	1	0.338919	0.338919	1.26036	0.0255857	0.182817
Hypertension	1	0.270623	0.270623	1.00109	0.0204299	0.434565
Diabetes	1	0.339634	0.339634	1.26309	0.0256397	0.171828
Dyslipidemia	1	0.225659	0.225659	0.831875	0.0170355	0.676324
Cataract	1	0.42188	0.42188	1.57902	0.0318486	0.0629371
StomachUlcer	1	0.304414	0.304414	1.12903	0.0229809	0.286713
StomachPolyps	1	0.19366	0.19366	0.712161	0.0146198	0.83017
DuodenalUlcers	1	0.382413	0.382413	1.42691	0.0288692	0.0629371
ColorectalPolyps	1	0.295511	0.295511	1.09525	0.0223088	0.323676
Gallstone	1	0.378327	0.378327	1.41122	0.0285607	0.0869131
Ureteral_KidneyStones	1	0.226354	0.226354	0.834481	0.0170879	0.691309
Gout	1	0.218129	0.218129	0.80365	0.016467	0.682318
Arm_wristFracture	1	0.40705	0.40705	1.52175	0.030729	0.0849151
OtherDiseases	1	0.206834	0.206834	0.761374	0.0156143	0.742258
Metabolome profiles
Metadata	Df	SumsOfSqs	MeanSqs	F.Model	R2	Pr(>F)
Surgery_Type	1	0.178489	0.178489	1.53672	0.0369966	0.174825
Reconstruction	4	0.454992	0.113748	0.957624	0.0986466	0.482517
Dumping_Syndrome	1	0.170497	0.170497	1.46539	0.0353402	0.197802
Hypertension	1	0.0678132	0.0678132	0.57026	0.0140561	0.667333
Cholesterol	1	0.224543	0.224543	1.95258	0.0465426	0.107892
DiabetesMed	1	0.208189	0.208189	1.80396	0.0431529	0.177822
GastricAcidMedication	1	0.0271078	0.0271078	0.226023	0.00561882	0.971029
Analgesic	1	0.112165	0.112165	0.952107	0.0232493	0.54046
Anticoagulant	1	0.133665	0.133665	1.13981	0.0277057	0.297702
Others	1	0.155889	0.155889	1.33565	0.0323122	0.213786
LungCancer	1	0.0795894	0.0795894	0.670951	0.0164971	0.685315
BreastCancer	1	0.0469152	0.0469152	0.392798	0.00972445	0.803197
OtherCancers	1	0.0698417	0.0698417	0.58757	0.0144766	0.624376
Stroke	1	0.170576	0.170576	1.4661	0.0353565	0.218781
CardiacInfarction	1	0.155258	0.155258	1.33006	0.0321815	0.228771
Angina	1	0.0673641	0.0673641	0.56643	0.013963	0.798202
Hypertension	1	0.0678132	0.0678132	0.57026	0.0140561	0.667333
Diabetes	1	0.208189	0.208189	1.80396	0.0431529	0.177822
Dyslipidemia	1	0.040918	0.040918	0.342157	0.00848137	0.89011
Cataract	1	0.0895545	0.0895545	0.756548	0.0185626	0.507493
StomachUlcer	1	0.019115	0.019115	0.159114	0.0039621	0.996004
StomachPolyps	1	0.0511677	0.0511677	0.428783	0.0106059	0.792208
DuodenalUlcers	1	0.119495	0.119495	1.01591	0.0247687	0.454545
ColorectalPolyps	1	0.242993	0.242993	2.12153	0.0503669	0.107892
Gallstone	1	0.1512	0.1512	1.29417	0.0313402	0.26973
Ureteral_KidneyStones	1	0.0457113	0.0457113	0.382622	0.00947491	0.871129
Gout	1	0.0609628	0.0609628	0.511916	0.0126362	0.682318
Arm_wristFracture	1	0.288437	0.288437	2.54352	0.0597863	0.0739261
OtherDiseases	1	0.0387701	0.0387701	0.32405	0.00803615	0.9001
f. PERMANOVA analysis on subsets of control participants
mOTU-annotated species
Metadata	Df	SumsOfSqs	MeanSqs	F.Model	R2	Pr(>F)
Hypertension	1	0.483316	0.483316	1.60079	0.0293181	0.0579421
Cholesterol	1	0.239422	0.239422	0.781084	0.0145234	0.706294
DiabetesMed	1	0.563859	0.563859	1.877	0.0342038	0.021978
GoutMed	1	0.178414	0.178414	0.579875	0.0108226	0.972028
GastricAcidMedication	1	0.328677	0.328677	1.07371	0.0194958	0.336663
Analgesic	1	0.394709	0.394709	1.30012	0.0239431	0.148851
Anticoagulant	1	0.239388	0.239388	0.78097	0.0145213	0.748252
Others	1	0.242409	0.242409	0.790973	0.0147046	0.707293
LungCancer	1	0.442811	0.442811	1.46293	0.026861	0.0649351
LiverCancer	1	0.230891	0.230891	0.752857	0.0140059	0.842158
BreastCancer	1	0.301371	0.301371	0.986948	0.0182812	0.411588
UterineCancer	1	0.217369	0.217369	0.708175	0.0131856	0.902098
OtherCancers	1	0.255241	0.255241	0.833503	0.015483	0.668332
CardiacInfarction	1	0.196291	0.196291	0.638678	0.011907	0.946054
Angina	1	0.256256	0.256256	0.83687	0.0155446	0.648352
Hypertension	1	0.483316	0.483316	1.60079	0.0293181	0.0579421
Diabetes	1	0.32541	0.32541	1.06726	0.0197395	0.360639
Dyslipidemia	1	0.216779	0.216779	0.706229	0.0131499	0.847153
Cataract	1	0.445273	0.445273	1.47129	0.0270103	0.104895
StomachUlcer	1	0.184089	0.184089	0.598526	0.0111668	0.914086
StomachPolyps	1	0.301743	0.301743	0.988189	0.0183038	0.417582
DuodenalUlcers	1	0.424076	0.424076	1.3994	0.0257245	0.107892
ColorectalPolyps	1	0.282808	0.282808	0.925097	0.0171552	0.528472
ChronicHepatitis_LiverCirrhosis	1	0.256901	0.256901	0.839009	0.0155837	0.738262
Gallstone	1	0.292313	0.292313	0.956749	0.0177318	0.48951
Ureteral_KidneyStones	1	0.202167	0.202167	0.658035	0.0122635	0.887113
Gout	1	0.282724	0.282724	0.924814	0.0171501	0.545455
Arm_wristFracture	1	0.297846	0.297846	0.97519	0.0180674	0.45954
OtherDiseases	1	0.353686	0.353686	1.16203	0.0214547	0.26973
MetaPhlan2-annotated species
Metadata	Df	SumsOfSqs	MeanSqs	F.Model	R2	Pr(>F)
Hypertension	1	0.470598	0.470598	1.4834	0.0272266	0.0659341
Cholesterol	1	0.30457	0.30457	0.950663	0.017621	0.502498
DiabetesMed	1	0.433688	0.433688	1.36406	0.0250912	0.113886
GoutMed	1	0.211621	0.211621	0.656945	0.0122434	0.954046
GastricAcidMedication	1	0.451326	0.451326	1.4132	0.0255029	0.0829171
Analgesic	1	0.402316	0.402316	1.26303	0.0232761	0.148851
Anticoagulant	1	0.242119	0.242119	0.752964	0.0140079	0.834166
Others	1	0.278062	0.278062	0.866572	0.0160874	0.644356
LungCancer	1	0.440389	0.440389	1.38569	0.0254789	0.0879121
LiverCancer	1	0.261737	0.261737	0.814912	0.0151429	0.799201
BreastCancer	1	0.320845	0.320845	1.00243	0.0185626	0.403596
UterineCancer	1	0.252033	0.252033	0.784252	0.0145814	0.865135
OtherCancers	1	0.251742	0.251742	0.783332	0.0145646	0.813187
CardiacInfarction	1	0.236157	0.236157	0.734168	0.013663	0.885115
Angina	1	0.301165	0.301165	0.939848	0.017424	0.514486
Hypertension	1	0.470598	0.470598	1.4834	0.0272266	0.0659341
Diabetes	1	0.260874	0.260874	0.812185	0.015093	0.728272
Dyslipidemia	1	0.317699	0.317699	0.992412	0.0183806	0.437562
Cataract	1	0.42348	0.42348	1.33114	0.0245005	0.13986
StomachUlcer	1	0.249776	0.249776	0.777126	0.0144509	0.762238
StomachPolyps	1	0.33101	0.33101	1.0348	0.0191507	0.366633
DuodenalUlcers	1	0.397584	0.397584	1.24783	0.0230023	0.15984
ColorectalPolyps	1	0.301764	0.301764	0.94175	0.0174587	0.523477
ChronicHepatitis_LiverCirrhosis	1	0.297278	0.297278	0.927505	0.0171991	0.525475
Gallstone	1	0.359552	0.359552	1.12593	0.020802	0.281718
Ureteral_KidneyStones	1	0.242545	0.242545	0.754309	0.0140325	0.804196
Gout	1	0.321133	0.321133	1.00334	0.0185792	0.432567
Arm_wristFracture	1	0.362969	0.362969	1.13686	0.0209997	0.262737
OtherDiseases	1	0.369363	0.369363	1.15732	0.0213696	0.262737
Metabolome profiles
	Df	SumsOfSqs	MeanSqs	F.Model	R2	Pr(>F)
Hypertension	1	0.121446	0.121446	0.951642	0.0183178	0.456543
Cholesterol	1	0.10481	0.10481	0.819185	0.0158085	0.571429
DiabetesMed	1	0.118221	0.118221	0.925909	0.0178313	0.476523
GoutMed	1	0.119858	0.119858	0.93897	0.0180783	0.398601
GastricAcidMedication	1	0.0681294	0.0681294	0.526856	0.0100302	0.829171
Analgesic	1	0.0798161	0.0798161	0.621457	0.0120387	0.74026
Anticoagulant	1	0.0112308	0.0112308	0.0865384	0.00169396	0.998002
Others	1	0.173194	0.173194	1.36801	0.0261231	0.184815
LungCancer	1	0.108198	0.108198	0.846104	0.0163195	0.417582
LiverCancer	1	0.098844	0.098844	0.771852	0.0149087	0.45954
BreastCancer	1	0.0683934	0.0683934	0.531591	0.0103158	0.835165
UterineCancer	1	0.0529368	0.0529368	0.410487	0.00798451	0.972028
OtherCancers	1	0.102913	0.102913	0.80413	0.0155225	0.531469
CardiacInfarction	1	0.0609492	0.0609492	0.473194	0.00919301	0.904096
Angina	1	0.0653734	0.0653734	0.507885	0.00986033	0.86014
Hypertension	1	0.121446	0.121446	0.951642	0.0183178	0.456543
Diabetes	1	0.105436	0.105436	0.824159	0.015903	0.553447
Dyslipidemia	1	0.13196	0.13196	1.0357	0.0199037	0.37962
Cataract	1	0.101498	0.101498	0.792901	0.0153091	0.586414
StomachUlcer	1	0.0974968	0.0974968	0.761175	0.0147055	0.618382
StomachPolyps	1	0.114971	0.114971	0.900011	0.0173412	0.454545
DuodenalUlcers	1	0.0456832	0.0456832	0.353851	0.00689044	0.96004
ColorectalPolyps	1	0.132647	0.132647	1.0412	0.0200073	0.367632
ChronicHepatitis_LiverCirrhosis	1	0.061742	0.061742	0.479407	0.00931259	0.834166
Gallstone	1	0.142729	0.142729	1.12208	0.021528	0.295704
Ureteral_KidneyStones	1	0.0459468	0.0459468	0.355906	0.00693019	0.956044
Gout	1	0.0939163	0.0939163	0.73282	0.0141655	0.622378
Arm_wristFracture	1	0.214008	0.214008	1.70114	0.032279	0.112887
OtherDiseases	1	0.0738608	0.0738608	0.574566	0.0111405	0.778222
