# Supplementary material for: Influence of gastrectomy for gastric cancer treatment on faecal microbiome and metabolome profiles
Source: HighWire-hosted journal article supplement (doi:10.1136/gutjnl-2019-319188), 2020-01-16

**A Principal coordinates analysis (PCoA)**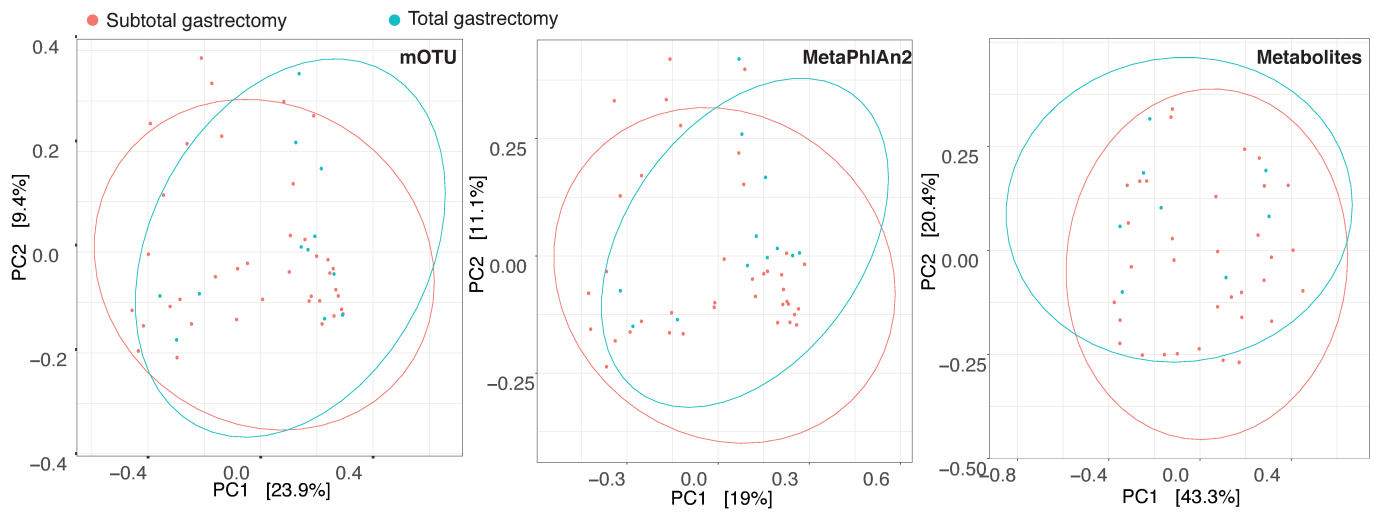**B Species richness (Chao1 index)**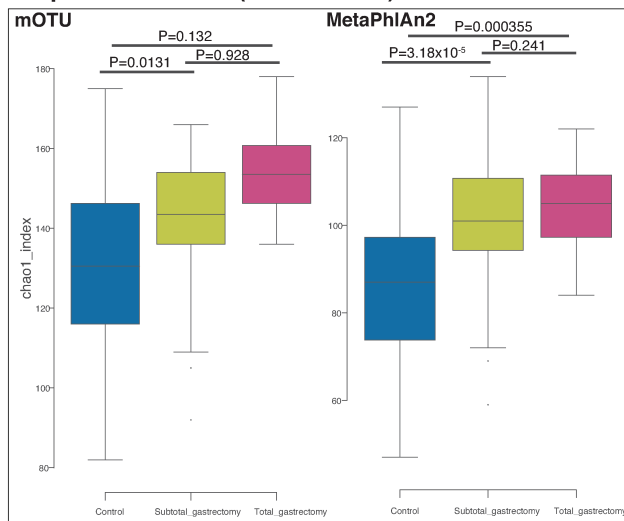**C Species diversity (Shannon-Wiener index)**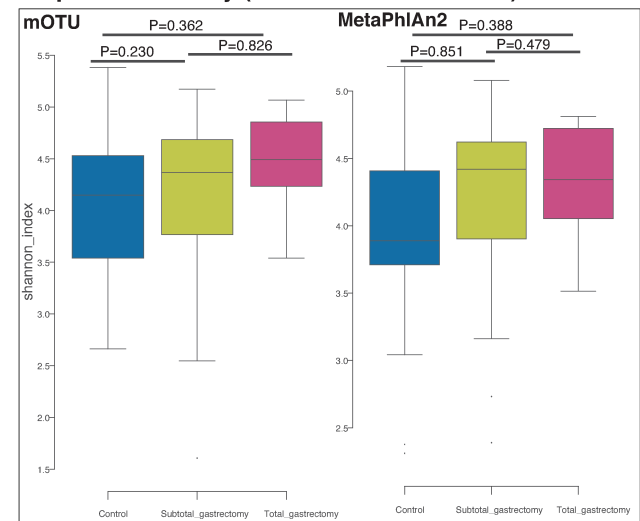**D Oral species**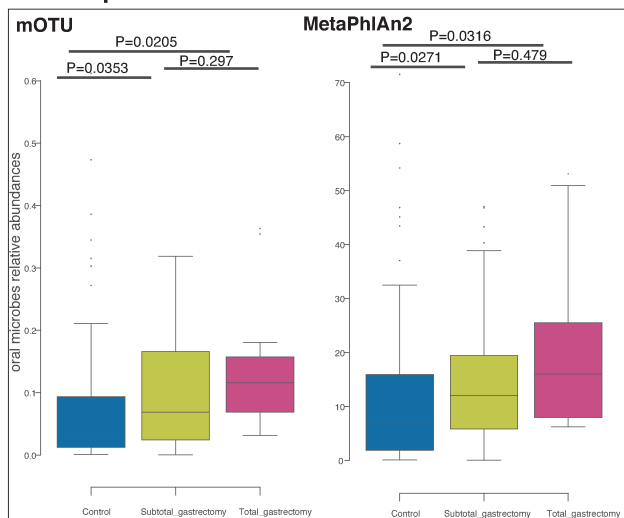**E Aerobes**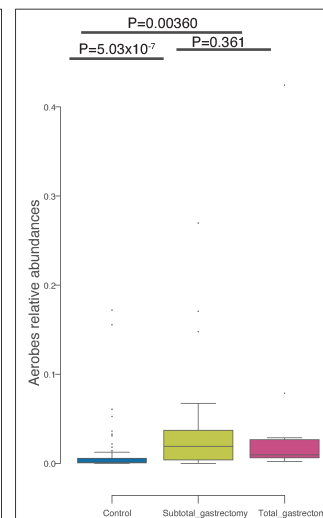**F Facultative anaerobes**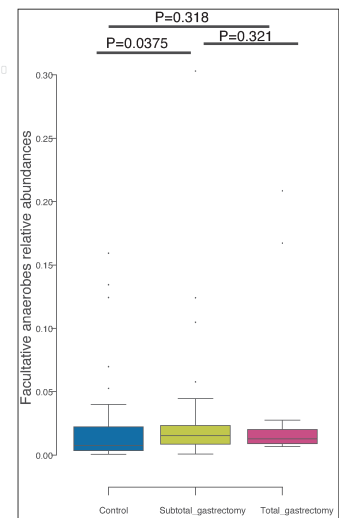

Supplement: gutjnl-2019-319188supp008_data_supplement.pdf [file gutjnl-2019-319188supp008_data_supplement.pdf]
