# Supplementary material for: Influence of gastrectomy for gastric cancer treatment on faecal microbiome and metabolome profiles
Source: HighWire-hosted journal article supplement (doi:10.1136/gutjnl-2019-319188), 2020-01-16
Supplement: gutjnl-2019-319188supp009_data_supplement.xls [file gutjnl-2019-319188supp009_data_supplement.xls]

## Sheet: Surgery_Type
Supplementary Table S5. Microbiome and metabolome enrichment in pairwise comparisons between different types of gastrectomy and the control group
A. Microbiome and metabolome profiles in pairwise comparison between total (n=12) and subtotal (n=38) gastrectomy
a. Species profiles
mOTU-annotated species	p_valKW	FDR	LDA_score	enrichment
Fusobacteriumnucleatum	5.58e-05	0.0149628	2.34274	Total_gastrectomy
MetaPhlan2-annotated species	p_valKW	FDR	LDA_score	enrichment
Fusobacterium_nucleatum	1.45e-05	0.00366311	2.14434	Total_gastrectomy
B. Microbiome and metabolome profiles in pairwise comparison between control (n=56) and subtotal (n=38) gastrectomy
a. Species profiles
mOTU-annotated species	p_valKW	FDR	LDA_score	enrichment
Akkermansiamuciniphila	0.0256754	0.0955695	3.44414	Subtotal_gastrectomy
Alistipesputredinis	0.000833977	0.00914533	3.83886	Subtotal_gastrectomy
Alistipesshahii	0.000230543	0.00363444	3.35651	Subtotal_gastrectomy
Bacteroidesintestinalis	0.00653365	0.0389115	3.77091	Subtotal_gastrectomy
Campylobacterconcisus	0.0222703	0.0882228	2.2809	Subtotal_gastrectomy
Coprococcuseutactus	0.00156972	0.0145064	2.85516	Subtotal_gastrectomy
Desulfovibriopiger	0.0211205	0.0857618	2.39082	Subtotal_gastrectomy
Enterobacteraerogenes	0.024804	0.0936262	3.29852	Subtotal_gastrectomy
Eubacteriumbiforme	0.0035936	0.0291844	3.49503	Subtotal_gastrectomy
Eubacteriumeligens	0.00406971	0.0294779	3.51968	Subtotal_gastrectomy
Fusobacteriumperiodonticum	0.0132344	0.0669211	2.34916	Subtotal_gastrectomy
Lactobacillusfermentum	0.00806594	0.0469929	2.6052	Subtotal_gastrectomy
Lactobacillusgasseri	0.01136	0.0596958	3.20441	Subtotal_gastrectomy
Lactobacillusoris	0.000788896	0.00914533	2.2647	Subtotal_gastrectomy
Fusobacteriummortiferum	0.0224908	0.0882228	3.97488	Control
Ruminococcusgnavus	6.43109e-07	0.000118875	3.91691	Control
Lactobacillusreuteri	0.0209651	0.0857618	3.6607	Subtotal_gastrectomy
Lactobacillussalivarius	0.000574812	0.0073357	3.54573	Subtotal_gastrectomy
Bifidobacteriumlongum	0.00193923	0.0173238	3.83102	Control
Bifidobacteriumpseudocatenulatum	0.0160629	0.0729639	3.7767	Control
Lactobacillusvaginalis	0.0271986	0.0958789	2.23223	Subtotal_gastrectomy
Odoribactersplanchnicus	0.0227141	0.0882228	2.92713	Subtotal_gastrectomy
Oxalobacterformigenes	0.00451559	0.0318468	2.59435	Subtotal_gastrectomy
Lachnospiraceaebacterium2_1_58FAA	1.02875e-06	0.000118875	3.46316	Control
Lachnospiraceaebacterium5_1_63FAA	0.00977735	0.0525532	3.40928	Control
Prevotellabuccae	0.00086587	0.00914533	2.66766	Subtotal_gastrectomy
Prevotelladenticola	0.0038528	0.0294779	2.40889	Subtotal_gastrectomy
Prevotellaveroralis	0.00980469	0.0525532	2.58323	Subtotal_gastrectomy
Lachnospiraceaebacterium9_1_43BFAA	0.0146197	0.0687384	3.2369	Control
Roseburiahominis	3.14138e-05	0.000935432	3.34752	Subtotal_gastrectomy
Roseburiainulinivorans	0.000733678	0.00893753	3.53761	Subtotal_gastrectomy
Roseburiaintestinalis	0.0168202	0.0734004	3.15743	Control
Bifidobacteriumdentium	0.00642775	0.0389115	3.0441	Control
Fusobacteriumulcerans	0.0141893	0.0679058	3.03203	Control
Ruminococcusobeum	0.00119657	0.0114528	3.10149	Subtotal_gastrectomy
Solobacteriummoorei	0.00396161	0.0294779	2.49464	Subtotal_gastrectomy
Streptococcusanginosus	2.19227e-05	0.000839327	2.52209	Subtotal_gastrectomy
Streptococcusthermophilus	0.0270415	0.0958789	2.8713	Control
Streptococcusaustralis	0.0186987	0.0795438	2.05957	Subtotal_gastrectomy
Bifidobacteriumangulatum	0.0288235	0.0990347	2.85464	Control
Klebsiellasp_1_1_55	0.013518	0.0670893	2.83898	Control
Clostridiumramosum	0.00399397	0.0294779	2.7764	Control
Streptococcusdownei	9.11051e-05	0.00187817	2.44295	Subtotal_gastrectomy
Streptococcusequinus	0.0167997	0.0734004	3.3908	Subtotal_gastrectomy
Bacteroidessp_2_2_4	0.0139519	0.0679058	2.65573	Control
Veillonellasp_3_1_44	0.000122488	0.00218845	2.65104	Control
Bifidobacteriumcatenulatum	0.0203679	0.0852904	2.64443	Control
Klebsiellavariicola	0.0169807	0.0734004	2.63256	Control
Streptococcusgallolyticus	0.00641437	0.0389115	2.16436	Subtotal_gastrectomy
Streptococcusinfantis	0.00840605	0.0479323	2.30672	Subtotal_gastrectomy
Streptococcusoralis	0.0264974	0.0958789	2.21768	Subtotal_gastrectomy
Eggerthellalenta	1.33069e-06	0.000118875	2.48724	Control
Streptococcusparasanguinis	0.0010106	0.0100311	3.35979	Subtotal_gastrectomy
Streptococcuspasteurianus	0.00553839	0.0371072	2.53564	Subtotal_gastrectomy
Streptococcusperoris	0.00300177	0.0259508	2.77299	Subtotal_gastrectomy
Streptococcusmutans	7.99854e-05	0.00180854	2.405	Control
Streptococcussalivarius	2.80181e-05	0.000935432	3.91223	Subtotal_gastrectomy
Coprobacillussp_D7	0.004747	0.0326204	2.38558	Control
Parasutterellaexcrementihominis	0.0231572	0.088659	2.36327	Control
Streptococcussanguinis	0.00639286	0.0389115	2.15529	Subtotal_gastrectomy
Eggerthellasp_HGA1	0.0159873	0.0729639	2.31342	Control
Streptococcussp_C150	0.000320644	0.00429663	2.80008	Subtotal_gastrectomy
Clostridiumsp_HGF2	0.000159672	0.00267451	2.29204	Control
Streptococcussp_M143	0.0275473	0.0958789	2.30637	Subtotal_gastrectomy
Parvimonasmicra	0.00939984	0.0524824	2.27798	Control
Streptococcussp_oraltaxon071	0.00611483	0.0389115	2.10834	Subtotal_gastrectomy
Eggerthellasp_1_3_56FAA	0.000887233	0.00914533	2.24718	Control
Streptococcusvestibularis	7.84806e-06	0.00052582	3.21999	Subtotal_gastrectomy
Veillonellaatypica	1.4232e-05	0.000635695	3.1316	Subtotal_gastrectomy
Veillonelladispar	3.52052e-05	0.000943499	2.96903	Subtotal_gastrectomy
Veillonellaparvula	1.1363e-05	0.000609059	2.89305	Subtotal_gastrectomy
Anaerotruncuscolihominis	0.003523	0.0291844	2.1239	Control
Veillonellasp_6_1_27	0.000111558	0.00213554	2.48249	Subtotal_gastrectomy
Streptococcussp_C300	0.0117011	0.0603055	2.07844	Control
Salmonellaenterica	0.0260862	0.0957687	2.07147	Control
Veillonellasp_oraltaxon158	0.000274438	0.00408607	3.30456	Subtotal_gastrectomy
MetaPhlan2-annotated species	p_valKW	FDR	LDA_score	enrichment
Ruminococcus_gnavus	1.05968e-06	0.00026916	4.07552	Control
Akkermansia_muciniphila	0.0217428	0.0986189	3.63054	Subtotal_gastrectomy
Eggerthella_lenta	2.17771e-05	0.00171945	2.47576	Control
Alistipes_putredinis	0.00171165	0.0173904	3.76939	Subtotal_gastrectomy
Eggerthella_unclassified	0.00012957	0.00394586	2.87933	Control
Alistipes_shahii	7.60865e-05	0.00322099	3.26595	Subtotal_gastrectomy
Bacteroidales_bacterium_ph8	0.000716175	0.0118792	2.77349	Subtotal_gastrectomy
Streptococcus_mutans	0.000348455	0.00680828	2.5756	Control
Coprobacillus_unclassified	0.00042465	0.00770436	3.0246	Control
Bacteroides_cellulosilyticus	0.0016844	0.0173904	3.34046	Subtotal_gastrectomy
Bacteroides_faecis	0.00775083	0.0492178	2.49065	Subtotal_gastrectomy
Anaerotruncus_colihominis	0.00110579	0.0156039	2.19782	Control
Clostridium_nexile	0.00345589	0.0325109	3.31706	Control
Bifidobacterium_dentium	0.00384876	0.032607	3.00882	Control
Blautia_producta	0.00387865	0.032607	2.308	Control
Catenibacterium_mitsuokai	0.0113134	0.0624699	2.94546	Subtotal_gastrectomy
Lachnospiraceae_bacterium_9_1_43BFAA	0.004013	0.032607	2.4039	Control
Bifidobacterium_longum	0.00522901	0.0377955	4.10582	Control
Oribacterium_sinus	0.00532067	0.0377955	2.91621	Control
Atopobium_parvulum	0.00535684	0.0377955	2.44025	Control
Clostridium_ramosum	0.00562999	0.0386491	2.4786	Control
Bacteroides_finegoldii	0.0095299	0.0550135	3.02632	Control
Lachnospiraceae_bacterium_5_1_63FAA	0.0100302	0.056615	2.85959	Control
Erysipelotrichaceae_bacterium_6_1_45	0.0117248	0.063364	2.52493	Control
Alistipes_indistinctus	0.0133272	0.069084	2.39537	Control
Bacteroides_fragilis	0.013712	0.069657	3.7381	Control
Alistipes_senegalensis	0.0189124	0.0873408	2.3594	Control
Eubacterium_biforme	0.00807798	0.0500441	3.41332	Subtotal_gastrectomy
Eubacterium_eligens	0.017987	0.0862021	3.40282	Subtotal_gastrectomy
Haemophilus_sputorum	0.00144348	0.0168694	2.61971	Subtotal_gastrectomy
Holdemania_unclassified	0.00711429	0.0463341	2.5857	Subtotal_gastrectomy
Lactobacillus_fermentum	0.0169022	0.0825608	2.69774	Subtotal_gastrectomy
Lactobacillus_oris	0.00410796	0.032607	2.40435	Subtotal_gastrectomy
Lactobacillus_reuteri	0.00144348	0.0168694	3.6407	Subtotal_gastrectomy
Lactobacillus_salivarius	0.000305461	0.00680828	3.6211	Subtotal_gastrectomy
Odoribacter_laneus	0.00144348	0.0168694	2.73127	Subtotal_gastrectomy
Odoribacter_splanchnicus	0.0132344	0.069084	2.95469	Subtotal_gastrectomy
Prevotella_buccae	0.00874553	0.0516596	2.87302	Subtotal_gastrectomy
Prevotella_histicola	0.00854136	0.0516549	3.30137	Subtotal_gastrectomy
Roseburia_hominis	5.36075e-05	0.00272326	3.35564	Subtotal_gastrectomy
Roseburia_inulinivorans	0.00302475	0.0295495	3.55892	Subtotal_gastrectomy
Ruminococcus_obeum	0.018786	0.0873408	2.93409	Subtotal_gastrectomy
Scardovia_wiggsiae	0.0156177	0.0777821	2.47348	Subtotal_gastrectomy
Streptococcus_anginosus	0.000333468	0.00680828	2.63488	Subtotal_gastrectomy
Streptococcus_gordonii	0.00394915	0.032607	2.33913	Subtotal_gastrectomy
Streptococcus_parasanguinis	0.00106977	0.0156039	3.58012	Subtotal_gastrectomy
Streptococcus_salivarius	0.000180788	0.00459201	4.06421	Subtotal_gastrectomy
Streptococcus_sanguinis	0.00146266	0.0168694	2.29664	Subtotal_gastrectomy
Streptococcus_sobrinus	0.000748294	0.0118792	2.43477	Subtotal_gastrectomy
Streptococcus_tigurinus	0.00491414	0.0377955	2.40482	Subtotal_gastrectomy
Streptococcus_vestibularis	0.000130139	0.00394586	3.16243	Subtotal_gastrectomy
Subdoligranulum_unclassified	0.00643643	0.0430224	4.10173	Subtotal_gastrectomy
Veillonella_atypica	6.01258e-06	0.000763598	2.8944	Subtotal_gastrectomy
Veillonella_dispar	0.000139814	0.00394586	2.38519	Subtotal_gastrectomy
Veillonella_parvula	2.70779e-05	0.00171945	2.88317	Subtotal_gastrectomy
Veillonella_unclassified	0.00152754	0.0168694	3.52629	Subtotal_gastrectomy
b. KEGG Module profiles based on in-house pipeline
KEGG-gene based	p_valKW	FDR	LDA_score	enrichment	Definitions
M00014	0.0248674	0.0934578	2.62743	Subtotal_gastrectomy	Glucuronate pathway (uronate pathway)
M00020	0.024352	0.0925375	2.68863	Subtotal_gastrectomy	Serine biosynthesis, glycerate-3P => serine
M00033	0.016714	0.0812454	3.07993	Subtotal_gastrectomy	Ectoine biosynthesis, aspartate => ectoine
M00080	0.0139303	0.0784066	2.01631	Subtotal_gastrectomy	Lipopolysaccharide biosynthesis, inner core => outer core => O-antigen
M00095	0.000552755	0.0209849	2.21968	Subtotal_gastrectomy	C5 isoprenoid biosynthesis, mevalonate pathway
M00117	0.0023795	0.0353822	2.10385	Subtotal_gastrectomy	Ubiquinone biosynthesis, prokaryotes, chorismate => ubiquinone
M00120	0.00439736	0.0469968	2.349	Subtotal_gastrectomy	Coenzyme A biosynthesis, pantothenate => CoA
M00166	0.000674953	0.0209849	2.26003	Subtotal_gastrectomy	Reductive pentose phosphate cycle, ribulose-5P => glyceraldehyde-3P
M00183	0.00228091	0.0353822	2.66108	Subtotal_gastrectomy	RNA polymerase, bacteria
M00217	0.00591807	0.0549498	2.00683	Subtotal_gastrectomy	D-Allose transport system
M00223	0.000292304	0.0166613	2.34473	Subtotal_gastrectomy	Phosphonate transport system
M00225	0.0127043	0.0752118	2.0726	Subtotal_gastrectomy	Lysine/arginine/ornithine transport system
M00600	0.000801875	0.0228534	2.04498	Control	alpha-1,4-Digalacturonate transport system
M00342	0.00136857	0.0334322	2.05241	Control	Bacterial proteasome
M00228	0.00340457	0.0388121	2.40853	Subtotal_gastrectomy	Putative glutamine transport system
M00298	0.00568396	0.0549498	2.39735	Subtotal_gastrectomy	Multidrug/hemolysin transport system
M00307	0.000630637	0.0209849	2.14592	Subtotal_gastrectomy	Pyruvate oxidation, pyruvate => acetyl-CoA
M00317	0.00674822	0.0549498	2.07312	Subtotal_gastrectomy	Manganese/iron transport system
M00323	0.0128174	0.0752118	2.00998	Subtotal_gastrectomy	Urea transport system
M00334	0.00643643	0.0549498	2.0906	Subtotal_gastrectomy	Type VI secretion system
M00335	0.00228091	0.0353822	2.45388	Subtotal_gastrectomy	Sec (secretion) system
M00344	0.00471107	0.0488238	2.1112	Subtotal_gastrectomy	Formaldehyde assimilation, xylulose monophosphate pathway
M00349	0.000372122	0.0181808	2.05918	Subtotal_gastrectomy	Microcin C transport system
M00359	0.0259435	0.096442	2.66115	Subtotal_gastrectomy	Aminoacyl-tRNA biosynthesis, eukaryotes
M00360	0.024352	0.0925375	2.70246	Subtotal_gastrectomy	Aminoacyl-tRNA biosynthesis, prokaryotes
M00461	0.000667611	0.0209849	2.10582	Control	MtrB-MtrA (osmotic stress response) two-component regulatory system
M00417	0.00264916	0.0356812	2.08484	Subtotal_gastrectomy	Cytochrome o ubiquinol oxidase
M00429	0.0238406	0.0925375	2.11244	Subtotal_gastrectomy	Competence-related DNA transformation transporter
M00444	0.0177279	0.0812454	2.01633	Subtotal_gastrectomy	PhoQ-PhoP (magnesium transport) two-component regulatory system
M00764	0.00882843	0.0650215	2.13469	Control	PTS system, fructoselysine/glucoselysine-specific II component
M00451	0.0189101	0.0812454	2.00353	Subtotal_gastrectomy	BasS-BasR (antimicrobial peptide resistance) two-component regulatory system
M00610	0.0181929	0.0812454	2.15426	Control	PTS system, D-glucosaminate-specific II component
M00452	0.00112921	0.0297069	2.32023	Subtotal_gastrectomy	CusS-CusR (copper tolerance) two-component regulatory system
M00453	0.00194377	0.035333	2.07032	Subtotal_gastrectomy	QseC-QseB (quorum sensing) two-component regulatory system
M00456	0.0144433	0.0784066	2.07889	Subtotal_gastrectomy	ArcB-ArcA (anoxic redox control) two-component regulatory system
M00459	6.08332e-06	0.0020805	2.45347	Subtotal_gastrectomy	VicK-VicR (cell wall metabolism) two-component regulatory system
M00233	0.00538403	0.054157	2.2361	Control	Glutamate transport system
M00443	0.00190433	0.035333	2.24811	Control	SenX3-RegX3 (phosphate starvation response) two-component regulatory system
M00468	0.000216854	0.0166613	2.02092	Subtotal_gastrectomy	SaeS-SaeR (staphylococcal virulence regulation) two-component regulatory system
M00481	0.00196294	0.035333	2.18543	Subtotal_gastrectomy	LiaS-LiaR (cell wall stress response) two-component regulatory system
M00202	0.000143825	0.0166613	2.33902	Control	Oligogalacturonide transport system
M00483	0.00410796	0.0453201	2.02146	Subtotal_gastrectomy	NreB-NreC (dissimilatory nitrate/nitrite reduction) two-component regulatory system
M00486	0.00796697	0.0619251	2.05901	Subtotal_gastrectomy	CitA-CitB (citrate fermentation) two-component regulatory system
M00205	0.0164683	0.0812454	2.36867	Control	N-Acetylglucosamine transport system
M00277	0.0090418	0.0650215	2.37297	Control	PTS system, N-acetylgalactosamine-specific II component
M00495	0.000280479	0.0166613	2.66206	Subtotal_gastrectomy	AgrC-AgrA (exoprotein synthesis) two-component regulatory system
M00521	0.00782779	0.0619251	2.02637	Subtotal_gastrectomy	CiaH-CiaR two-component regulatory system
M00549	0.0128426	0.0752118	2.48253	Subtotal_gastrectomy	Nucleotide sugar biosynthesis, glucose => UDP-glucose
M00267	0.0143925	0.0784066	2.44406	Control	PTS system, N-acetylglucosamine-specific II component
M00601	0.0120956	0.0752118	2.00553	Subtotal_gastrectomy	Putative chitobiose transport system
M00706	0.0176015	0.0812454	2.18136	Subtotal_gastrectomy	Multidrug resistance, EfrAB transporter
M00432	0.00841515	0.0639551	2.47247	Control	Leucine biosynthesis, 2-oxoisovalerate => 2-oxoisocaproate
M00707	0.0183945	0.0812454	2.38319	Subtotal_gastrectomy	Multidrug resistance, MdlAB/SmdAB transporter
M00535	0.00627917	0.0549498	2.52153	Control	Isoleucine biosynthesis, pyruvate => 2-oxobutanoate
M00122	0.00659722	0.0549498	2.59341	Control	Cobalamin biosynthesis, cobinamide => cobalamin
M00708	0.00950607	0.0650215	2.02568	Subtotal_gastrectomy	Multidrug resistance, PatAB transporter
M00722	0.00179612	0.035333	2.06567	Subtotal_gastrectomy	Cationic antimicrobial peptide (CAMP) resistance, ethanolaminephosphotransferase EptA
M00723	0.0185479	0.0812454	2.02257	Subtotal_gastrectomy	Cationic antimicrobial peptide (CAMP) resistance, ethanolaminephosphotransferase EptB
M00743	0.00643558	0.0549498	2.12924	Subtotal_gastrectomy	Aminoglycoside resistance, protease HtpX
M00744	0.0177279	0.0812454	2.01633	Subtotal_gastrectomy	Cationic antimicrobial peptide (CAMP) resistance, protease PgtE
M00746	0.0121223	0.0752118	2.08133	Subtotal_gastrectomy	Multidrug resistance, repression of porin OmpF
M00212	0.0109213	0.0732367	2.81023	Control	Ribose transport system
M00519	0.0022197	0.0353822	3.00903	Control	YesM-YesN two-component regulatory system
M00754	0.00196294	0.035333	2.18543	Subtotal_gastrectomy	Nisin resistance, phage shock protein homolog LiaH
M00196	0.0238406	0.0925375	3.11137	Control	Raffinose/stachyose/melibiose transport system
M00207	0.00268177	0.0356812	3.13956	Control	Putative multiple sugar transport system
c. KEGG modules based on HUMAnN2 pipeline
Uniref90-based	p_valKW	FDR	LDA_score	enrichment	Definitions
M00008	0.0243517	0.0809794	2.64717	Subtotal_gastrectomy	Entner-Doudoroff pathway, glucose-6P => glyceraldehyde-3P + pyruvate
M00064	0.00138468	0.0198055	2.6428	Subtotal_gastrectomy	ADP-L-glycero-D-manno-heptose biosynthesis
M00088	0.00041865	0.0101871	2.14874	Subtotal_gastrectomy	Ketone body biosynthesis, acetyl-CoA => acetoacetate/3-hydroxybutyrate/acetone
M00095	2.95486e-05	0.00258033	2.66802	Subtotal_gastrectomy	C5 isoprenoid biosynthesis, mevalonate pathway
M00117	0.00135072	0.0198055	2.43533	Subtotal_gastrectomy	Ubiquinone biosynthesis, prokaryotes, chorismate => ubiquinone
M00120	0.0186309	0.0684367	2.30864	Subtotal_gastrectomy	Coenzyme A biosynthesis, pantothenate => CoA
M00150	0.00692969	0.044966	2.55493	Subtotal_gastrectomy	Fumarate reductase, prokaryotes
M00166	0.00176302	0.0198093	2.47656	Subtotal_gastrectomy	Reductive pentose phosphate cycle, ribulose-5P => glyceraldehyde-3P
M00169	0.00240798	0.0231876	2.40672	Subtotal_gastrectomy	CAM (Crassulacean acid metabolism), light
M00172	0.00787047	0.0468324	2.14153	Subtotal_gastrectomy	C4-dicarboxylic acid cycle, NADP - malic enzyme type
M00194	0.00757121	0.0468324	2.11658	Subtotal_gastrectomy	Maltose/maltodextrin transport system
M00209	8.42351e-05	0.00491933	2.70422	Subtotal_gastrectomy	Osmoprotectant transport system
M00213	0.00824103	0.0471839	2.1929	Subtotal_gastrectomy	L-Arabinose transport system
M00215	0.0293752	0.0953062	2.22933	Subtotal_gastrectomy	D-Xylose transport system
M00220	0.0014243	0.0198055	2.22132	Subtotal_gastrectomy	Rhamnose transport system
M00223	0.00183168	0.0198093	2.4851	Subtotal_gastrectomy	Phosphonate transport system
M00225	0.0088111	0.0471961	2.37886	Subtotal_gastrectomy	Lysine/arginine/ornithine transport system
M00226	0.021696	0.0745322	2.32068	Subtotal_gastrectomy	Histidine transport system
M00227	0.00171189	0.0198093	2.28067	Subtotal_gastrectomy	Glutamine transport system
M00228	0.00314606	0.0262472	2.6796	Subtotal_gastrectomy	Putative glutamine transport system
M00229	0.0157447	0.0638535	2.30092	Subtotal_gastrectomy	Arginine transport system
M00230	0.00295853	0.025625	2.35048	Subtotal_gastrectomy	Glutamate/aspartate transport system
M00241	0.0108686	0.0525515	2.18041	Subtotal_gastrectomy	Vitamin B12 transport system
M00251	0.017212	0.0670119	2.1731	Subtotal_gastrectomy	Teichoic acid transport system
M00270	0.0192185	0.0684367	2.3863	Subtotal_gastrectomy	PTS system, trehalose-specific II component
M00275	0.000899558	0.0175114	2.774	Subtotal_gastrectomy	PTS system, cellobiose-specific II component
M00281	0.00248544	0.0231876	2.03964	Subtotal_gastrectomy	PTS system, lactose-specific II component
M00300	0.0123914	0.0556662	2.27037	Subtotal_gastrectomy	Putrescine transport system
M00342	0.020921	0.0736017	2.27344	Control	Bacterial proteasome
M00302	0.0156415	0.0638535	2.20743	Subtotal_gastrectomy	2-Aminoethylphosphonate transport system
M00307	3.53469e-05	0.00258033	2.31878	Subtotal_gastrectomy	Pyruvate oxidation, pyruvate => acetyl-CoA
M00317	0.0155589	0.0638535	2.39376	Subtotal_gastrectomy	Manganese/iron transport system
M00318	0.000136589	0.00618702	2.35906	Subtotal_gastrectomy	Iron/zinc/manganese/copper transport system
M00319	3.37087e-05	0.00258033	2.26815	Subtotal_gastrectomy	Manganese/zinc/iron transport system
M00324	0.017212	0.0670119	2.39318	Subtotal_gastrectomy	Dipeptide transport system
M00348	0.0107426	0.0525515	2.27233	Subtotal_gastrectomy	Glutathione transport system
M00349	0.00797795	0.0468324	2.20241	Subtotal_gastrectomy	Microcin C transport system
M00417	0.00686579	0.044966	2.31848	Subtotal_gastrectomy	Cytochrome o ubiquinol oxidase
M00429	0.0140699	0.0613197	2.30376	Subtotal_gastrectomy	Competence-related DNA transformation transporter
M00444	0.0190131	0.0684367	2.19696	Subtotal_gastrectomy	PhoQ-PhoP (magnesium transport) two-component regulatory system
M00445	0.0109782	0.0525515	2.22457	Subtotal_gastrectomy	EnvZ-OmpR (osmotic stress response) two-component regulatory system
M00461	0.00720147	0.0457137	2.34266	Control	MtrB-MtrA (osmotic stress response) two-component regulatory system
M00446	0.00370438	0.0290433	2.23929	Subtotal_gastrectomy	RstB-RstA two-component regulatory system
M00447	0.00888968	0.0471961	2.40918	Subtotal_gastrectomy	CpxA-CpxR (envelope stress response) two-component regulatory system
M00456	0.0244048	0.0809794	2.13076	Subtotal_gastrectomy	ArcB-ArcA (anoxic redox control) two-component regulatory system
M00459	4.07274e-06	0.00118924	2.50716	Subtotal_gastrectomy	VicK-VicR (cell wall metabolism) two-component regulatory system
M00473	0.012075	0.0556662	2.32729	Subtotal_gastrectomy	UhpB-UhpA (hexose phosphates uptake) two-component regulatory system
M00479	0.0147857	0.0631281	2.14405	Subtotal_gastrectomy	DesK-DesR (membrane lipid fluidity regulation) two-component regulatory system
M00233	0.0092441	0.047436	2.39362	Control	Glutamate transport system
M00481	0.000328364	0.00966158	2.19951	Subtotal_gastrectomy	LiaS-LiaR (cell wall stress response) two-component regulatory system
M00492	0.00129761	0.0198055	2.32032	Subtotal_gastrectomy	LytS-LytR two-component regulatory system
M00495	0.000148319	0.00618702	2.90096	Subtotal_gastrectomy	AgrC-AgrA (exoprotein synthesis) two-component regulatory system
M00497	0.00516385	0.0376961	2.52049	Subtotal_gastrectomy	GlnL-GlnG (nitrogen regulation) two-component regulatory system
M00521	0.00203489	0.0204893	2.30401	Subtotal_gastrectomy	CiaH-CiaR two-component regulatory system
M00023	0.0259435	0.0851179	2.42656	Control	Tryptophan biosynthesis, chorismate => tryptophan
M00585	0.00882735	0.0471961	2.19237	Subtotal_gastrectomy	L-Cystine transport system
M00593	0.000356715	0.00966158	2.19343	Subtotal_gastrectomy	Inositol transport system
M00635	0.00122927	0.0198055	2.12068	Subtotal_gastrectomy	Tetracycline resistance, TetAB(46) transporter
M00646	0.000647213	0.013499	2.53504	Subtotal_gastrectomy	Multidrug resistance, efflux pump AcrAD-TolC
M00648	0.0189631	0.0684367	2.25286	Subtotal_gastrectomy	Multidrug resistance, efflux pump MdtABC
M00006	0.0106687	0.0525515	2.52781	Control	Pentose phosphate pathway, oxidative phase, glucose 6P => ribulose 5P
M00394	0.00801925	0.0468324	2.52802	Control	RNA degradosome
M00657	0.0214212	0.0744643	2.68056	Subtotal_gastrectomy	VanS-VanR (VanE type vancomycin resistance) two-component regulatory system
M00701	0.0113895	0.0536407	2.35901	Subtotal_gastrectomy	Multidrug resistance, efflux pump EmrAB
M00222	0.00387907	0.0290433	2.61508	Control	Phosphate transport system
M00706	0.0025411	0.0231876	2.13528	Subtotal_gastrectomy	Multidrug resistance, EfrAB transporter
M00709	0.0242238	0.0809794	2.226	Subtotal_gastrectomy	Macrolide resistance, MacAB-TolC transporter
M00724	0.00566713	0.040361	2.42596	Subtotal_gastrectomy	Cationic antimicrobial peptide (CAMP) resistance, palmitoyl transferase PagP
M00728	0.00888968	0.0471961	2.40918	Subtotal_gastrectomy	Cationic antimicrobial peptide (CAMP) resistance, envelope protein folding and degrading factors DegP and DsbA
M00739	0.0188007	0.0684367	2.33607	Subtotal_gastrectomy	Cationic peptide transport system
M00743	0.0123914	0.0556662	2.62839	Subtotal_gastrectomy	Aminoglycoside resistance, protease HtpX
M00026	0.00349512	0.0283493	2.69171	Control	Histidine biosynthesis, PRPP => histidine
M00744	0.0190131	0.0684367	2.1906	Subtotal_gastrectomy	Cationic antimicrobial peptide (CAMP) resistance, protease PgtE
M00754	0.000308359	0.00966158	2.21162	Subtotal_gastrectomy	Nisin resistance, phage shock protein homolog LiaH
M00620	0.00925976	0.047436	2.78113	Control	Incomplete reductive citrate cycle, acetyl-CoA => oxoglutarate
M00432	0.0188025	0.0684367	2.80016	Control	Leucine biosynthesis, 2-oxoisovalerate => 2-oxoisocaproate
M00096	0.00178165	0.0198093	2.80727	Control	C5 isoprenoid biosynthesis, non-mevalonate pathway
M00454	0.0137538	0.06085	2.82437	Control	KdpD-KdpE (potassium transport) two-component regulatory system
M00525	0.00183168	0.0198093	2.84582	Control	Lysine biosynthesis, acetyl-DAP pathway, aspartate => lysine
M00256	0.00298373	0.025625	2.86178	Control	Cell division transport system
M00527	0.00142437	0.0198055	2.89185	Control	Lysine biosynthesis, DAP aminotransferase pathway, aspartate => lysine
M00761	0.0149172	0.0631281	2.30843	Subtotal_gastrectomy	Undecaprenylphosphate alpha-L-Ara4N biosynthesis, UDP-GlcA => undecaprenyl phosphate alpha-L-Ara4N
M00002	0.00692969	0.044966	2.95394	Control	Glycolysis, core module involving three-carbon compounds
M00157	0.00193565	0.020186	2.97298	Control	F-type ATPase, prokaryotes and chloroplasts
M00793	0.00582793	0.040518	3.03895	Control	dTDP-L-rhamnose biosynthesis
M00535	0.000363964	0.00966158	3.18529	Control	Isoleucine biosynthesis, pyruvate => 2-oxobutanoate
d. Metabolites profile
Metabolite	p_valKW	FDR	LDA_score	enrichment
C00025_Glu	0.0106126	0.0281069	3.96396	Subtotal_gastrectomy
C00294_Inosine	0.000901273	0.00367497	2.01581	Control
C00628_2_5_Dihydroxybenzoate	0.0177679	0.0427187	2.0261	Control
C00630_IsobutyrylCoA	0.000368553	0.00195218	2.03024	Control
C00719_Betaine	0.0205083	0.04828	2.0393	Control
C05598_Phenaceturate	0.00121139	0.0047237	2.04018	Control
C00043_UDP_N_acetylglucosamine	2.0748e-06	2.93065e-05	2.05029	Control
C00357_N_Acetylglucosamine6_phosphate	7.30293e-06	7.98611e-05	2.06026	Control
C00037_Gly	0.000403214	0.00199403	4.06616	Subtotal_gastrectomy
C00860_Histidinol	0.0303372	0.0655052	2.08453	Control
C01996_Acetylcholine	1.75172e-06	2.58188e-05	2.09375	Control
C02614_Citramalate	0.0249475	0.0563813	2.10309	Control
C01736_Purineriboside	0.00892985	0.024547	2.11469	Control
C00041_Ala	1.17241e-06	1.98724e-05	4.30586	Subtotal_gastrectomy
C01152_3_Methylhistidine	0.00238429	0.00850815	2.16628	Control
C00612_N1_Acetylspermidine	0.034224	0.0726394	2.17327	Control
C00042_Succinate	0.0069726	0.0209178	3.99713	Subtotal_gastrectomy
C05123_Isethionate	0.0147002	0.0375193	2.23131	Control
C00093_Glycerophosphate	8.87297e-05	0.000617185	2.24388	Control
C06524_Nornicotine	5.90361e-08	2.50165e-06	2.24823	Control
C05660_5_Methoxyindoleacetate	0.000898123	0.00367497	2.25193	Control
C00156_p_Hydroxybenzoate	0.0511714	0.0930225	2.25661	Control
f___2_Hydroxyoctanoate	0.00186379	0.00679382	2.30364	Control
f___2_Hydroxypentanoate	0.00291985	0.0100691	2.31717	Control
C00315_Spermidine	0.00735603	0.0218618	2.31959	Control
C00383_Malonate	0.0400624	0.0803618	2.32375	Control
C00065_Ser	0.00047709	0.00223373	2.96898	Subtotal_gastrectomy
C00073_Met	6.26625e-05	0.000461795	3.21875	Subtotal_gastrectomy
C00318_Carnitine	0.00592768	0.0183123	2.37322	Control
C05584_4_Hydroxy_3_methoxymandelate	0.0230765	0.0532446	2.3945	Control
C00715_Pterin	0.0521365	0.0930225	2.40674	Control
C00077_Ornithine	0.00531177	0.0168289	3.01587	Subtotal_gastrectomy
C06423_Octanoate	0.0451386	0.0874398	2.41856	Control
C03793_N6_N6_N6_Trimethyllysine	0.0211642	0.0494805	2.45827	Control
C00423_trans_Cinnamate	0.000910612	0.00367497	2.46188	Control
C11284_3_Indolebutyrate	0.000257659	0.00145577	2.47256	Control
C00078_Trp	0.000527287	0.00238334	2.65882	Subtotal_gastrectomy
C00079_Phe	0.00462341	0.0147862	3.29138	Subtotal_gastrectomy
C00082_Tyr	6.70411e-06	7.57564e-05	3.53613	Subtotal_gastrectomy
C01586_Hippurate	0.0154073	0.0383684	2.53105	Control
C00993_Ala_Ala	0.000376749	0.00196489	2.53636	Control
C11527_4_Hydroxymandelate	0.00018352	0.00111095	2.55325	Control
C00942_cGMP	0.0348459	0.0726394	2.57805	Control
C16741_5_Hydroxylysine	0.0014697	0.00566169	2.59041	Control
C00003_NAD_	8.92096e-05	0.000617185	2.59498	Control
C00106_Uracil	2.05529e-09	2.32248e-07	3.37586	Subtotal_gastrectomy
C00116_Glycerol	0.00294052	0.0100691	2.35202	Subtotal_gastrectomy
C00122_Fumarate	0.0443442	0.0863946	2.14462	Subtotal_gastrectomy
C00931_Porphobilinogen	0.0370889	0.0766656	2.63568	Control
C00152_Asn	0.000479922	0.00223373	2.63596	Control
C00123_Leu	4.6207e-05	0.000348093	3.79704	Subtotal_gastrectomy
C02567_N1_Acetylspermine_div	0.00164072	0.00624948	2.65263	Control
C00140_N_Acetylglucosamine	1.1357e-08	6.41673e-07	3.59468	Subtotal_gastrectomy
C02714_N_Acetylputrescine	0.0473219	0.0897934	2.66346	Control
C00148_Pro	1.4035e-06	2.26566e-05	3.76837	Subtotal_gastrectomy
C00178_Thymine	0.00605185	0.0184827	2.86491	Subtotal_gastrectomy
C00183_Val	2.78742e-05	0.000247494	3.83544	Subtotal_gastrectomy
C00135_His	0.017477	0.0423193	2.72884	Control
C11003_2_4_Dimethylaniline	4.65087e-07	1.0239e-05	2.73953	Control
C00214_Thymidine	0.000283148	0.00154818	2.52546	Subtotal_gastrectomy
C00233_4_Methyl_2_oxopentanoate	0.0016833	0.00634041	2.76782	Subtotal_gastrectomy
C11331_Leu_Leu_Tyr	0.0521365	0.0930225	2.78054	Control
C00253_Nicotinate	1.88995e-08	9.15276e-07	2.81606	Subtotal_gastrectomy
C00262_Hypoxanthine	1.88622e-07	4.91868e-06	2.62376	Subtotal_gastrectomy
C00295_Orotate	9.9733e-06	0.000102453	2.53056	Subtotal_gastrectomy
C00299_Uridine	0.00897884	0.024547	2.50403	Subtotal_gastrectomy
C00064_Gln	0.00238384	0.00850815	2.85316	Control
C00327_Citrulline	7.06405e-10	2.32248e-07	3.53813	Subtotal_gastrectomy
C00329_Glucosamine	4.17104e-05	0.00032136	2.63985	Subtotal_gastrectomy
C00366_Urate	0.0169942	0.0414462	3.25618	Subtotal_gastrectomy
C00385_Xanthine	5.31117e-09	3.60098e-07	3.52374	Subtotal_gastrectomy
C00300_Creatine	0.00796668	0.022695	2.96367	Control
C00407_Ile	6.47814e-07	1.22005e-05	3.67013	Subtotal_gastrectomy
C05122_Taurocholate	2.45845e-05	0.000231504	3.00229	Control
C00624_N_Acetylglutamate	0.0123618	0.0322359	2.82076	Subtotal_gastrectomy
C00711_Malate	0.0483067	0.090475	2.80197	Subtotal_gastrectomy
C02703_SerineO_sulfate	0.0348459	0.0726394	3.08566	Control
C00134_Putrescine_1_4_Butanediamine_	0.0503939	0.0923434	3.1316	Control
C00044_GTP	0.0348459	0.0726394	3.14013	Control
C04137_Octopine	0.0306123	0.0656808	3.19033	Control
C00785_Urocanate	0.00052528	0.00238334	2.9325	Subtotal_gastrectomy
C00864_Pantothenate	1.12561e-06	1.98724e-05	2.40861	Subtotal_gastrectomy
C00791_Creatinine	0.00885138	0.024547	3.23019	Control
C00954_Indole_3_acetate	0.0257713	0.0578573	2.21176	Subtotal_gastrectomy
C00062_Arg	1.0105e-07	3.11418e-06	3.24881	Control
C01879_5_Oxoproline	4.83255e-07	1.0239e-05	3.26105	Subtotal_gastrectomy
C02043_Indolelactate	1.54817e-06	2.38559e-05	2.0108	Subtotal_gastrectomy
C02356_2AB	0.0114584	0.0301116	3.20508	Subtotal_gastrectomy
C02630_2_Hydroxyglutarate	0.000860648	0.00360197	3.24741	Subtotal_gastrectomy
C01921_Glycocholate	0.0054207	0.017015	3.3769	Control
C02679_Dodecanoate	0.0381282	0.0783362	2.68944	Subtotal_gastrectomy
C02710_N_Acetylleucine	0.00766967	0.0222662	2.06574	Subtotal_gastrectomy
C02713_N_Acetylmuramate	0.000729667	0.00317124	2.61328	Subtotal_gastrectomy
C00245_Taurine	1.21153e-05	0.000120796	3.5571	Control
C02989_Methioninesulfoxide	1.0105e-07	3.11418e-06	2.72672	Subtotal_gastrectomy
C03264_2_Hydroxy_4_methylpentanoate	3.23401e-05	0.000267398	3.06638	Subtotal_gastrectomy
C04483_DCA	0.000201876	0.00119754	3.59213	Subtotal_gastrectomy
C00695_Cholate	0.000391736	0.00198207	3.6722	Control
C05582_Homovanillate	0.0029898	0.0101138	2.90451	Subtotal_gastrectomy
C05607_3_Phenyllactate	1.75652e-05	0.000170132	2.79939	Subtotal_gastrectomy
C05984_2_Hydroxybutyrate	0.0155058	0.0383684	2.75059	Subtotal_gastrectomy
C00086_Urea	9.31341e-06	9.86639e-05	3.93928	Control
C09815_Benzamide	3.63724e-06	4.93209e-05	2.70636	Subtotal_gastrectomy
C11118_1_Methyl_2_pyrrolidinone	0.00121228	0.0047237	2.94399	Subtotal_gastrectomy
C17715_Undecanoate	0.047413	0.0897934	2.34031	Subtotal_gastrectomy
C00431_5_Aminovalerate	9.80602e-05	0.000639277	4.09733	Control
C00158_Citrate	0.0471246	0.0897934	4.13682	Control
f___Cysteine_glutathionedisulphide	0.047413	0.0897934	2.62726	Subtotal_gastrectomy
C00246_Butyrate	0.0286044	0.0625605	4.35272	Control
C00429_Dihydrouracil	1.4204e-09	2.32248e-07	4.70325	Control
C. Microbiome and metabolome profiles in pairwise comparison between control (n=56) and total (n=12) gastrectomy
a. Species profiles
mOTU-annotated species	p_valKW	FDR	LDA_score	enrichment
Acidaminococcussp_D21	0.00275104	0.0351085	3.02923	Total_gastrectomy
Akkermansiamuciniphila	0.0023458	0.0314338	3.7719	Total_gastrectomy
Alistipessp_HGB5	0.0118405	0.0793311	2.76031	Total_gastrectomy
Anaerostipessp_3_2_56FAA	0.0141703	0.0846243	2.58326	Control
Atopobiumrimae	0.00950043	0.0727461	3.25338	Total_gastrectomy
Bacteroidessp_1_1_14	0.00304016	0.0370346	3.37108	Total_gastrectomy
Bacteroidessp_1_1_6	0.00444804	0.0474403	3.33663	Total_gastrectomy
Bacteroidesthetaiotaomicron	0.0071085	0.0602965	3.4631	Total_gastrectomy
butyrate_producingbacteriumSS3_4	0.00101961	0.0170785	3.66625	Total_gastrectomy
Clostridiumramosum	0.00943236	0.0727461	2.92369	Control
Clostridiumsp_HGF2	0.0165107	0.0941459	2.57605	Control
Clostridiumspiroforme	0.000557521	0.0106725	2.46656	Control
Clostridiumsymbiosum	0.0139543	0.0846243	2.34186	Total_gastrectomy
Coprobacillussp_D7	0.00460242	0.0474403	2.68217	Control
Eggerthellalenta	0.0138452	0.0846243	2.70278	Control
Eubacteriumbiforme	0.00635767	0.0588374	2.88655	Total_gastrectomy
Fusobacteriumnucleatum	1.52987e-05	0.00205002	2.86701	Total_gastrectomy
Gemellahaemolysans	0.0100643	0.0749234	2.55213	Total_gastrectomy
Klebsiellapneumoniae	2.94406e-05	0.00228214	4.32711	Total_gastrectomy
Klebsiellasp_1_1_55	0.0036546	0.0417808	2.98454	Control
Klebsiellavariicola	0.00042291	0.00944498	2.85701	Control
Lachnospiraceaebacterium2_1_58FAA	0.000962846	0.0170785	3.46823	Control
Lachnospiraceaebacterium3_1_46FAA	0.0105528	0.0764366	3.08767	Control
Megasphaeramicronuciformis	0.00142016	0.0211446	2.29127	Control
Oribacteriumsinus	0.00719958	0.0602965	2.83151	Total_gastrectomy
Prevotellabuccae	4.92801e-08	1.32071e-05	3.11116	Total_gastrectomy
Prevotelladenticola	0.00010359	0.00396602	3.3813	Total_gastrectomy
Prevotellamelaninogenica	0.00670166	0.0598682	3.18227	Total_gastrectomy
Prevotellaveroralis	3.40618e-05	0.00228214	3.22397	Total_gastrectomy
Roseburiahominis	0.0021	0.0296211	3.44325	Total_gastrectomy
Rothiadentocariosa	0.00636673	0.0588374	3.06242	Total_gastrectomy
Ruminococcusgnavus	0.000488788	0.0100766	3.90736	Control
Solobacteriummoorei	0.0156464	0.0911571	3.08234	Total_gastrectomy
Streptococcusanginosus	0.000349013	0.00850322	3.14022	Total_gastrectomy
Streptococcusgordonii	0.00564203	0.0560024	2.49928	Control
Streptococcusmutans	0.00141412	0.0211446	2.63143	Control
Streptococcuspasteurianus	0.0142093	0.0846243	2.89958	Total_gastrectomy
Streptococcussalivarius	0.0116715	0.0793311	3.42425	Total_gastrectomy
Streptococcussp_C150	0.00374157	0.0417808	2.55008	Total_gastrectomy
Streptococcussp_oraltaxon071	0.0111534	0.0786608	2.65126	Total_gastrectomy
Streptococcusvestibularis	0.0121416	0.0793643	3.13156	Total_gastrectomy
Veillonellaatypica	5.59877e-05	0.00300094	3.75546	Total_gastrectomy
Veillonelladispar	0.000271525	0.00727686	3.13277	Total_gastrectomy
Veillonellaparvula	9.18405e-05	0.00396602	3.20721	Total_gastrectomy
Veillonellasp_3_1_44	0.000124972	0.00413135	2.75954	Total_gastrectomy
Veillonellasp_6_1_27	0.000138739	0.00413135	2.86444	Total_gastrectomy
Veillonellasp_oraltaxon158	0.0092827	0.0727461	2.56727	Total_gastrectomy
MetaPhlAn2-annotated species	p_valKW	FDR	LDA_score	enrichment
Akkermansia_muciniphila	0.00159398	0.0182583	3.96844	Total_gastrectomy
Clostridium_nexile	0.0114443	0.0873925	3.32795	Control
Clostridium_symbiosum	0.00956645	0.077766	2.35845	Control
Coprobacillus_unclassified	0.00601013	0.0605821	3.12802	Control
Eggerthella_lenta	0.00153034	0.0182583	2.36231	Control
Fusobacterium_nucleatum	4.12453e-06	0.000334082	1.43359	Total_gastrectomy
Klebsiella_pneumoniae	5.30288e-06	0.000334082	4.57314	Total_gastrectomy
Megasphaera_micronuciformis	6.59828e-05	0.00207846	2.45817	Total_gastrectomy
Neisseria_unclassified	0.00817688	0.0735919	2.18756	Total_gastrectomy
Oribacterium_sinus	0.0087025	0.0756217	2.29812	Total_gastrectomy
Oscillibacter_unclassified	0.0126472	0.093738	3.15676	Control
Prevotella_buccae	3.10743e-07	7.83073e-05	2.42705	Total_gastrectomy
Prevotella_denticola	4.67528e-06	0.000334082	2.70873	Total_gastrectomy
Prevotella_histicola	1.93745e-05	0.000976475	2.79389	Total_gastrectomy
Prevotella_melaninogenica	0.000976567	0.0136719	2.30617	Total_gastrectomy
Prevotella_veroralis	0.00130454	0.0173023	2.6973	Total_gastrectomy
Pyramidobacter_piscolens	0.00931625	0.077766	2.15856	Control
Roseburia_hominis	0.001565	0.0182583	3.49099	Total_gastrectomy
Rothia_unclassified	8.74222e-05	0.00220304	2.07493	Total_gastrectomy
Ruminococcus_gnavus	0.000940409	0.0136719	4.05536	Control
Slackia_piriformis	0.000103701	0.0023757	2.45739	Control
Stomatobaculum_longum	4.73971e-05	0.00170629	2.34052	Total_gastrectomy
Streptococcus_anginosus	0.000181793	0.00381765	3.19294	Total_gastrectomy
Streptococcus_mutans	0.00481217	0.0505278	2.54492	Control
Streptococcus_parasanguinis	0.00748358	0.0698477	3.57629	Total_gastrectomy
Streptococcus_salivarius	0.0111209	0.0873925	3.60515	Total_gastrectomy
Streptococcus_sobrinus	0.00748368	0.0698477	2.13888	Total_gastrectomy
Streptococcus_tigurinus	8.50669e-05	0.00220304	2.78282	Total_gastrectomy
Veillonella_atypica	2.49672e-05	0.00104862	3.45747	Total_gastrectomy
Veillonella_dispar	0.000334649	0.00577647	2.72705	Total_gastrectomy
Veillonella_parvula	0.000574285	0.009045	3.15828	Total_gastrectomy
Veillonella_unclassified	0.00168934	0.0185092	3.84148	Total_gastrectomy
b. KEGG Module profiles based on in-house pipeline
KEGG-gene based	p_valKW	FDR	LDA_score	enrichment	Definitions
M00014	0.0371475	0.0953402	2.79534	Total_gastrectomy	Glucuronate pathway (uronate pathway)
M00032	0.0141647	0.0440394	2.4779	Total_gastrectomy	Lysine degradation, lysine => saccharopine => acetoacetyl-CoA
M00064	0.00870369	0.0303741	2.60215	Total_gastrectomy	ADP-L-glycero-D-manno-heptose biosynthesis
M00600	0.0203348	0.0596454	2.06631	Control	alpha-1,4-Digalacturonate transport system
M00117	0.00220934	0.0112776	2.42752	Total_gastrectomy	Ubiquinone biosynthesis, prokaryotes, chorismate => ubiquinone
M00121	0.0178077	0.0543769	2.46209	Total_gastrectomy	Heme biosynthesis, glutamate => protoheme/siroheme
M00134	0.00642952	0.0252746	2.63987	Total_gastrectomy	Polyamine biosynthesis, arginine => ornithine => putrescine
M00461	0.00669429	0.0254314	2.09236	Control	MtrB-MtrA (osmotic stress response) two-component regulatory system
M00136	0.00299817	0.0144419	2.17414	Total_gastrectomy	GABA biosynthesis, prokaryotes, putrescine => GABA
M00150	0.0122452	0.0402678	2.52422	Total_gastrectomy	Fumarate reductase, prokaryotes
M00153	0.00642952	0.0252746	3.00373	Total_gastrectomy	Cytochrome d ubiquinol oxidase
M00166	0.00106721	0.00760385	2.52512	Total_gastrectomy	Reductive pentose phosphate cycle, ribulose-5P => glyceraldehyde-3P
M00176	0.0233268	0.0664814	2.3437	Total_gastrectomy	Assimilatory sulfate reduction, sulfate => H2S
M00191	0.021296	0.0617223	2.41817	Total_gastrectomy	Thiamine transport system
M00192	0.00153766	0.00930178	2.22263	Total_gastrectomy	Putative thiamine transport system
M00193	0.0195047	0.0585141	2.48284	Total_gastrectomy	Putative spermidine/putrescine transport system
M00194	0.00085951	0.00747764	2.43108	Total_gastrectomy	Maltose/maltodextrin transport system
M00233	0.0271349	0.0736519	2.22786	Control	Glutamate transport system
M00656	0.020405	0.0596454	2.23336	Control	VanS-VanR (VanB type vancomycin resistance) two-component regulatory system
M00216	0.0195047	0.0585141	2.23962	Control	Multiple sugar transport system
M00198	0.0343696	0.0890485	2.38166	Total_gastrectomy	Putative sn-glycerol-phosphate transport system
M00204	0.000439052	0.00652851	2.07281	Total_gastrectomy	Trehalose/maltose transport system
M00210	0.0302741	0.0790362	2.69256	Total_gastrectomy	Phospholipid transport system
M00213	0.000121307	0.00345726	2.38597	Total_gastrectomy	L-Arabinose transport system
M00253	5.41824e-05	0.00205893	2.24847	Control	Sodium transport system
M00215	0.00828072	0.0298106	2.36571	Total_gastrectomy	D-Xylose transport system
M00219	0.0277768	0.0748005	2.14964	Total_gastrectomy	AI-2 transport system
M00220	0.00870369	0.0303741	2.20857	Total_gastrectomy	Rhamnose transport system
M00223	0.00340996	0.0155494	2.46846	Total_gastrectomy	Phosphonate transport system
M00225	0.000430097	0.00652851	2.48516	Total_gastrectomy	Lysine/arginine/ornithine transport system
M00226	0.000630039	0.00686159	2.41156	Total_gastrectomy	Histidine transport system
M00227	0.00173991	0.0100026	2.27771	Total_gastrectomy	Glutamine transport system
M00229	0.00203173	0.0105722	2.42116	Total_gastrectomy	Arginine transport system
M00230	0.00195208	0.0104325	2.34828	Total_gastrectomy	Glutamate/aspartate transport system
M00241	0.000988684	0.00747764	2.33928	Total_gastrectomy	Vitamin B12 transport system
M00813	0.0373555	0.0953402	2.32928	Control	Lantibiotic transport system
M00259	0.0134671	0.0422575	2.32797	Total_gastrectomy	Heme transport system
M00278	0.0296754	0.0780691	2.24285	Total_gastrectomy	PTS system, sorbose-specific II component
M00283	0.00748954	0.0272492	2.80195	Total_gastrectomy	PTS system, ascorbate-specific II component
M00300	0.000930821	0.00747764	2.51384	Total_gastrectomy	Putrescine transport system
M00302	2.56225e-06	0.000175258	2.26192	Total_gastrectomy	2-Aminoethylphosphonate transport system
M00317	0.000706137	0.00689996	2.45092	Total_gastrectomy	Manganese/iron transport system
M00318	0.0199503	0.0593304	2.05928	Total_gastrectomy	Iron/zinc/manganese/copper transport system
M00319	0.000682146	0.00686159	2.0583	Total_gastrectomy	Manganese/zinc/iron transport system
M00323	4.01307e-05	0.00171559	2.18714	Total_gastrectomy	Urea transport system
M00200	0.000668801	0.00686159	2.36019	Control	Putative sorbitol/mannitol transport system
M00324	0.0134671	0.0422575	2.35726	Total_gastrectomy	Dipeptide transport system
M00331	0.00130047	0.0085445	2.47019	Total_gastrectomy	Type II general secretion pathway
M00334	0.00195228	0.0104325	2.54257	Total_gastrectomy	Type VI secretion system
M00344	0.00311839	0.0148124	2.52622	Total_gastrectomy	Formaldehyde assimilation, xylulose monophosphate pathway
M00349	0.000543123	0.00686159	2.48977	Total_gastrectomy	Microcin C transport system
M00417	0.000385883	0.00652851	2.54378	Total_gastrectomy	Cytochrome o ubiquinol oxidase
M00435	0.013468	0.0422575	2.34666	Total_gastrectomy	Taurine transport system
M00436	0.00423056	0.0180857	2.40735	Total_gastrectomy	Sulfonate transport system
M00438	7.06211e-07	0.000171327	2.17639	Total_gastrectomy	Nitrate/nitrite transport system
M00442	0.00115463	0.00805882	2.2712	Total_gastrectomy	Putative hydroxymethylpyrimidine transport system
M00444	0.000273836	0.00588179	2.52438	Total_gastrectomy	PhoQ-PhoP (magnesium transport) two-component regulatory system
M00445	0.000964656	0.00747764	2.51769	Total_gastrectomy	EnvZ-OmpR (osmotic stress response) two-component regulatory system
M00446	0.000313097	0.00588179	2.4091	Total_gastrectomy	RstB-RstA two-component regulatory system
M00447	0.00661024	0.0254011	2.47345	Total_gastrectomy	CpxA-CpxR (envelope stress response) two-component regulatory system
M00449	0.00175484	0.0100026	2.41675	Total_gastrectomy	CreC-CreB (phosphate regulation) two-component regulatory system
M00450	0.00102763	0.00747764	2.24223	Total_gastrectomy	BaeS-BaeR (envelope stress response) two-component regulatory system
M00451	0.00134913	0.0085445	2.36012	Total_gastrectomy	BasS-BasR (antimicrobial peptide resistance) two-component regulatory system
M00452	0.0053514	0.0217878	2.4007	Total_gastrectomy	CusS-CusR (copper tolerance) two-component regulatory system
M00453	0.00187908	0.0104325	2.47319	Total_gastrectomy	QseC-QseB (quorum sensing) two-component regulatory system
M00456	0.00333323	0.0154049	2.47866	Total_gastrectomy	ArcB-ArcA (anoxic redox control) two-component regulatory system
M00277	0.0162414	0.0500411	2.43053	Control	PTS system, N-acetylgalactosamine-specific II component
M00471	0.00230962	0.011616	2.38219	Total_gastrectomy	NarX-NarL (nitrate respiration) two-component regulatory system
M00473	0.000564203	0.00686159	2.32615	Total_gastrectomy	UhpB-UhpA (hexose phosphates uptake) two-component regulatory system
M00474	0.00133683	0.0085445	2.34613	Total_gastrectomy	RcsC-RcsD-RcsB (capsule synthesis) two-component regulatory system
M00475	0.000996607	0.00747764	2.44174	Total_gastrectomy	BarA-UvrY (central carbon metabolism) two-component regulatory system
M00477	0.000275699	0.00588179	2.64033	Total_gastrectomy	EvgS-EvgA (acid and drug tolerance) two-component regulatory system
M00486	0.000326766	0.00588179	2.61452	Total_gastrectomy	CitA-CitB (citrate fermentation) two-component regulatory system
M00488	0.00171043	0.0100026	2.27074	Total_gastrectomy	DcuS-DcuR (C4-dicarboxylate metabolism) two-component regulatory system
M00497	0.000753362	0.00715694	2.54786	Total_gastrectomy	GlnL-GlnG (nitrogen regulation) two-component regulatory system
M00502	0.000877965	0.00747764	2.42148	Total_gastrectomy	GlrK-GlrR (amino sugar metabolism) two-component regulatory system
M00503	0.00204025	0.0105722	2.13338	Total_gastrectomy	PgtB-PgtA (phosphoglycerate transport) two-component regulatory system
M00518	0.00495894	0.0204332	2.20793	Total_gastrectomy	GlnK-GlnL (glutamine utilization) two-component regulatory system
M00530	0.0015503	0.00930178	2.39925	Total_gastrectomy	Dissimilatory nitrate reduction, nitrate => ammonia
M00533	9.03378e-06	0.000441365	2.32243	Total_gastrectomy	Homoprotocatechuate degradation, homoprotocatechuate => 2-oxohept-3-enedioate
M00550	0.0105951	0.0359321	2.37114	Total_gastrectomy	Ascorbate degradation, ascorbate => D-xylulose-5P
M00551	2.16005e-06	0.000175258	2.08732	Total_gastrectomy	Benzoate degradation, benzoate => catechol / methylbenzoate => methylcatechol
M00568	7.06661e-05	0.00241678	2.0348	Total_gastrectomy	Catechol ortho-cleavage, catechol => 3-oxoadipate
M00590	0.00273151	0.0133454	2.07543	Total_gastrectomy	Erythritol transport system
M00593	0.00359993	0.0157858	2.28697	Total_gastrectomy	Inositol transport system
M00645	0.00102763	0.00747764	2.24223	Total_gastrectomy	Multidrug resistance, efflux pump SmeABC
M00648	0.00350529	0.0157738	2.2405	Total_gastrectomy	Multidrug resistance, efflux pump MdtABC
M00649	1.50287e-06	0.000171327	2.37081	Total_gastrectomy	Multidrug resistance, efflux pump AdeABC
M00655	1.50287e-06	0.000171327	2.37552	Total_gastrectomy	AdeS-AdeR two-component regulatory system
M00668	0.0251745	0.0704218	2.25435	Total_gastrectomy	Tetracycline resistance, TetA transporter
M00696	0.000881182	0.00747764	2.78072	Total_gastrectomy	Multidrug resistance, efflux pump AcrEF-TolC
M00697	8.2296e-05	0.00255866	2.81946	Total_gastrectomy	Multidrug resistance, efflux pump MdtEF-TolC
M00701	0.00594682	0.0239272	2.79483	Total_gastrectomy	Multidrug resistance, efflux pump EmrAB
M00709	0.00387085	0.0167574	2.50915	Total_gastrectomy	Macrolide resistance, MacAB-TolC transporter
M00711	0.00743957	0.0272492	2.34648	Total_gastrectomy	Multidrug resistance, efflux pump MdtIJ
M00197	0.00360026	0.0157858	2.57424	Control	Putative fructooligosaccharide transport system
M00605	0.00102498	0.00747764	2.57478	Control	Glucose/mannose transport system
M00721	0.000578657	0.00686159	2.27809	Total_gastrectomy	Cationic antimicrobial peptide (CAMP) resistance, arnBCADTEF operon
M00606	0.000628552	0.00686159	2.6108	Control	N,N'-Diacetylchitobiose transport system
M00722	0.00262851	0.0130283	2.37883	Total_gastrectomy	Cationic antimicrobial peptide (CAMP) resistance, ethanolaminephosphotransferase EptA
M00206	0.000668801	0.00686159	2.61536	Control	Cellobiose transport system
M00602	0.00137929	0.00857665	2.63571	Control	Arabinosaccharide transport system
M00723	0.000292851	0.00588179	2.50953	Total_gastrectomy	Cationic antimicrobial peptide (CAMP) resistance, ethanolaminephosphotransferase EptB
M00724	0.00064061	0.00686159	2.45435	Total_gastrectomy	Cationic antimicrobial peptide (CAMP) resistance, palmitoyl transferase PagP
M00205	0.000458991	0.00654063	2.68519	Control	N-Acetylglucosamine transport system
M00728	0.00661024	0.0254011	2.47345	Total_gastrectomy	Cationic antimicrobial peptide (CAMP) resistance, envelope protein folding and degrading factors DegP and DsbA
M00739	0.0074562	0.0272492	2.34846	Total_gastrectomy	Cationic peptide transport system
M00743	0.000964656	0.00747764	2.53718	Total_gastrectomy	Aminoglycoside resistance, protease HtpX
M00744	0.000273836	0.00588179	2.52438	Total_gastrectomy	Cationic antimicrobial peptide (CAMP) resistance, protease PgtE
M00746	0.000405426	0.00652851	2.37974	Total_gastrectomy	Multidrug resistance, repression of porin OmpF
M00761	0.000623495	0.00686159	2.36872	Total_gastrectomy	Undecaprenylphosphate alpha-L-Ara4N biosynthesis, UDP-GlcA => undecaprenyl phosphate alpha-L-Ara4N
M00454	0.0290055	0.0768984	2.8349	Control	KdpD-KdpE (potassium transport) two-component regulatory system
M00742	0.0254707	0.0704218	2.86148	Control	Aminoglycoside resistance, protease FtsH
M00554	0.00322886	0.015127	2.86213	Control	Nucleotide sugar biosynthesis, galactose => UDP-galactose
M00767	3.24865e-06	0.000185173	2.19738	Total_gastrectomy	Multidrug resistance, efflux pump OqxAB
M00519	0.0116715	0.0387538	3.08433	Control	YesM-YesN two-component regulatory system
M00271	0.00195228	0.0104325	3.08886	Control	PTS system, beta-glucoside-specific II component
M00603	0.0047047	0.0196221	3.2557	Control	Putative aldouronate transport system
M00196	0.00676682	0.0254314	3.26764	Control	Raffinose/stachyose/melibiose transport system
M00207	0.000292229	0.00588179	3.39125	Control	Putative multiple sugar transport system
M00258	0.0290055	0.0768984	3.69093	Control	Putative ABC transport system
Uniref90-based	p_valKW	FDR	LDA_score	enrichment	Definitions
M00003	0.0113442	0.0473216	3.34671	Total_gastrectomy	Gluconeogenesis, oxaloacetate => fructose-6P
M00022	0.0243783	0.0827729	2.54558	Total_gastrectomy	Shikimate pathway, phosphoenolpyruvate + erythrose-4P => chorismate
M00063	0.000628552	0.00917686	3.04642	Total_gastrectomy	CMP-KDO biosynthesis
M00064	0.000711436	0.0094427	2.97902	Total_gastrectomy	ADP-L-glycero-D-manno-heptose biosynthesis
M00117	0.000903077	0.0107978	2.8282	Total_gastrectomy	Ubiquinone biosynthesis, prokaryotes, chorismate => ubiquinone
M00150	0.0223149	0.0804437	2.79298	Total_gastrectomy	Fumarate reductase, prokaryotes
M00166	3.42858e-05	0.00166857	2.78448	Total_gastrectomy	Reductive pentose phosphate cycle, ribulose-5P => glyceraldehyde-3P
M00169	0.0128437	0.0528221	2.61259	Total_gastrectomy	CAM (Crassulacean acid metabolism), light
M00176	0.0254648	0.0854682	2.64672	Total_gastrectomy	Assimilatory sulfate reduction, sulfate => H2S
M00192	0.00920842	0.0407403	2.41015	Total_gastrectomy	Putative thiamine transport system
M00194	0.00412247	0.0218866	2.26091	Total_gastrectomy	Maltose/maltodextrin transport system
M00198	0.00146249	0.0133452	2.77012	Total_gastrectomy	Putative sn-glycerol-phosphate transport system
M00204	0.000663566	0.00922673	2.08736	Total_gastrectomy	Trehalose/maltose transport system
M00209	0.00522645	0.0263125	2.73292	Total_gastrectomy	Osmoprotectant transport system
M00212	0.00164294	0.0138299	3.09908	Total_gastrectomy	Ribose transport system
M00213	0.000539294	0.00874854	2.56086	Total_gastrectomy	L-Arabinose transport system
M00215	0.0074687	0.0340759	2.35711	Total_gastrectomy	D-Xylose transport system
M00219	0.000143999	0.00382253	2.50466	Total_gastrectomy	AI-2 transport system
M00220	0.00122568	0.0122496	2.41525	Total_gastrectomy	Rhamnose transport system
M00225	0.000924473	0.0107978	2.6508	Total_gastrectomy	Lysine/arginine/ornithine transport system
M00226	0.00199001	0.0157049	2.55707	Total_gastrectomy	Histidine transport system
M00227	0.00266081	0.0177631	2.50359	Total_gastrectomy	Glutamine transport system
M00229	0.0177963	0.0658207	2.50877	Total_gastrectomy	Arginine transport system
M00230	0.00119563	0.0122496	2.59494	Total_gastrectomy	Glutamate/aspartate transport system
M00241	0.00106789	0.011549	2.54769	Total_gastrectomy	Vitamin B12 transport system
M00265	0.00340996	0.0195237	2.84757	Total_gastrectomy	PTS system, glucose-specific II component
M00268	0.0111217	0.0470659	2.77958	Total_gastrectomy	PTS system, alpha-glucoside-specific II component
M00270	0.00610741	0.0287639	2.66377	Total_gastrectomy	PTS system, trehalose-specific II component
M00272	0.00960799	0.0418736	2.33458	Total_gastrectomy	PTS system, beta-glucoside (arbutin/salicin/cellobiose)-specific II component
M00273	0.0170087	0.0653493	2.80427	Total_gastrectomy	PTS system, fructose-specific II component
M00274	0.00610741	0.0287639	2.93534	Total_gastrectomy	PTS system, mannitol-specific II component
M00275	0.00380018	0.0205491	2.99323	Total_gastrectomy	PTS system, cellobiose-specific II component
M00283	0.000590566	0.00907607	3.11581	Total_gastrectomy	PTS system, ascorbate-specific II component
M00300	0.0036431	0.0204574	2.48341	Total_gastrectomy	Putrescine transport system
M00302	8.42281e-06	0.00157351	2.44589	Total_gastrectomy	2-Aminoethylphosphonate transport system
M00307	0.00130047	0.0122496	2.44043	Total_gastrectomy	Pyruvate oxidation, pyruvate => acetyl-CoA
M00317	0.00273151	0.0177631	2.60395	Total_gastrectomy	Manganese/iron transport system
M00318	0.0134495	0.054545	2.18595	Total_gastrectomy	Iron/zinc/manganese/copper transport system
M00319	0.000136426	0.00382253	2.41851	Total_gastrectomy	Manganese/zinc/iron transport system
M00323	1.07775e-05	0.00157351	2.4107	Total_gastrectomy	Urea transport system
M00324	0.0100833	0.043299	2.57775	Total_gastrectomy	Dipeptide transport system
M00331	0.00305656	0.0182146	2.4781	Total_gastrectomy	Type II general secretion pathway
M00348	0.000269078	0.0060439	2.48223	Total_gastrectomy	Glutathione transport system
M00349	0.00374277	0.0205491	2.4431	Total_gastrectomy	Microcin C transport system
M00417	0.00178867	0.0145081	2.52642	Total_gastrectomy	Cytochrome o ubiquinol oxidase
M00436	0.000239842	0.00583615	2.64576	Total_gastrectomy	Sulfonate transport system
M00440	0.0266052	0.086319	2.50465	Total_gastrectomy	Nickel transport system
M00442	0.00444804	0.0231934	2.45925	Total_gastrectomy	Putative hydroxymethylpyrimidine transport system
M00444	2.83138e-05	0.00165353	2.766	Total_gastrectomy	PhoQ-PhoP (magnesium transport) two-component regulatory system
M00445	0.00274525	0.0177631	2.55456	Total_gastrectomy	EnvZ-OmpR (osmotic stress response) two-component regulatory system
M00446	0.000448255	0.00837071	2.51399	Total_gastrectomy	RstB-RstA two-component regulatory system
M00447	0.00285914	0.0177631	2.75326	Total_gastrectomy	CpxA-CpxR (envelope stress response) two-component regulatory system
M00471	6.72699e-05	0.00245535	2.46564	Total_gastrectomy	NarX-NarL (nitrate respiration) two-component regulatory system
M00473	0.00205702	0.0158066	2.53083	Total_gastrectomy	UhpB-UhpA (hexose phosphates uptake) two-component regulatory system
M00475	0.029276	0.0919203	2.16583	Total_gastrectomy	BarA-UvrY (central carbon metabolism) two-component regulatory system
M00481	0.0272184	0.0863888	2.12338	Total_gastrectomy	LiaS-LiaR (cell wall stress response) two-component regulatory system
M00492	0.0191995	0.0700783	2.38865	Total_gastrectomy	LytS-LytR two-component regulatory system
M00495	0.0243641	0.0827729	2.68447	Total_gastrectomy	AgrC-AgrA (exoprotein synthesis) two-component regulatory system
M00497	0.000458669	0.00837071	2.84078	Total_gastrectomy	GlnL-GlnG (nitrogen regulation) two-component regulatory system
M00518	0.00779466	0.035016	2.5771	Total_gastrectomy	GlnK-GlnL (glutamine utilization) two-component regulatory system
M00530	0.000136911	0.00382253	2.41526	Total_gastrectomy	Dissimilatory nitrate reduction, nitrate => ammonia
M00545	0.00283295	0.0177631	2.31224	Total_gastrectomy	Trans-cinnamate degradation, trans-cinnamate => acetyl-CoA
M00550	0.00130047	0.0122496	2.64144	Total_gastrectomy	Ascorbate degradation, ascorbate => D-xylulose-5P
M00555	0.000818293	0.0103888	2.37573	Total_gastrectomy	Betaine biosynthesis, choline => betaine
M00572	0.00231407	0.0171374	2.86365	Total_gastrectomy	Pimeloyl-ACP biosynthesis, BioC-BioH pathway, malonyl-ACP => pimeloyl-ACP
M00593	0.000330363	0.00689044	2.40675	Total_gastrectomy	Inositol transport system
M00646	0.00165769	0.0138299	2.62523	Total_gastrectomy	Multidrug resistance, efflux pump AcrAD-TolC
M00648	0.00323332	0.0188826	2.4902	Total_gastrectomy	Multidrug resistance, efflux pump MdtABC
M00696	0.00570001	0.0277401	2.70066	Total_gastrectomy	Multidrug resistance, efflux pump AcrEF-TolC
M00701	0.00302435	0.0182146	2.67345	Total_gastrectomy	Multidrug resistance, efflux pump EmrAB
M00709	0.00533719	0.0264146	2.69049	Total_gastrectomy	Macrolide resistance, MacAB-TolC transporter
M00711	0.00103226	0.011549	2.70245	Total_gastrectomy	Multidrug resistance, efflux pump MdtIJ
M00267	0.0243783	0.0827729	2.80888	Control	PTS system, N-acetylglucosamine-specific II component
M00721	0.00156387	0.0138299	2.43825	Total_gastrectomy	Cationic antimicrobial peptide (CAMP) resistance, arnBCADTEF operon
M00723	0.0068363	0.0316857	2.57894	Total_gastrectomy	Cationic antimicrobial peptide (CAMP) resistance, ethanolaminephosphotransferase EptB
M00724	4.40923e-05	0.00183928	2.84157	Total_gastrectomy	Cationic antimicrobial peptide (CAMP) resistance, palmitoyl transferase PagP
M00727	0.0243641	0.0827729	2.78057	Total_gastrectomy	Cationic antimicrobial peptide (CAMP) resistance, N-acetylmuramoyl-L-alanine amidase AmiA and AmiC
M00728	0.00285914	0.0177631	2.75326	Total_gastrectomy	Cationic antimicrobial peptide (CAMP) resistance, envelope protein folding and degrading factors DegP and DsbA
M00739	0.0178031	0.0658207	2.49807	Total_gastrectomy	Cationic peptide transport system
M00740	0.0144907	0.0571794	2.77113	Total_gastrectomy	Methylaspartate cycle
M00527	0.0233268	0.0827729	2.98915	Control	Lysine biosynthesis, DAP aminotransferase pathway, aspartate => lysine
M00744	2.83138e-05	0.00165353	2.76831	Total_gastrectomy	Cationic antimicrobial peptide (CAMP) resistance, protease PgtE
M00157	0.00273687	0.0177631	3.04577	Control	F-type ATPase, prokaryotes and chloroplasts
M00746	0.0260833	0.086319	2.29387	Total_gastrectomy	Multidrug resistance, repression of porin OmpF
M00222	0.000489042	0.00840002	3.05595	Control	Phosphate transport system
M00754	0.0272184	0.0863888	2.11795	Total_gastrectomy	Nisin resistance, phage shock protein homolog LiaH
M00535	0.0266052	0.086319	3.10207	Control	Isoleucine biosynthesis, pyruvate => 2-oxobutanoate
M00761	0.00234759	0.0171374	2.51858	Total_gastrectomy	Undecaprenylphosphate alpha-L-Ara4N biosynthesis, UDP-GlcA => undecaprenyl phosphate alpha-L-Ara4N
M00793	0.014119	0.0564759	3.22841	Control	dTDP-L-rhamnose biosynthesis
M00207	0.00522645	0.0263125	3.30431	Control	Putative multiple sugar transport system
M00767	1.99164e-05	0.00165353	2.51931	Total_gastrectomy	Multidrug resistance, efflux pump OqxAB
M00196	0.0178077	0.0658207	3.35366	Control	Raffinose/stachyose/melibiose transport system
M00258	0.0155047	0.060365	3.78066	Control	Putative ABC transport system
d. Metabolites profile
Metabolite	p_valKW	FDR	LDA_score	enrichment
C03406_Argininosuccinate	0.0064957	0.0994702	2.00115	Control
C00043_UDP_N_acetylglucosamine	0.00346832	0.083735	2.04578	Control
C00449_Saccharopine	0.000752905	0.0439511	2.07058	Control
C01996_Acetylcholine	0.00344113	0.083735	2.11442	Control
C04501_N_Acetylglucosamine1_phosphate	0.000577912	0.0439511	2.13644	Control
C00357_N_Acetylglucosamine6_phosphate	0.00236754	0.0800228	2.14429	Control
C06524_Nornicotine	0.00130568	0.0630457	2.22401	Control
C05771_Isopropanolamine	0.00188544	0.0708089	2.31177	Control
f___Cysteine_glutathionedisulphide	0.00475117	0.0994702	2.50533	Total_gastrectomy
C00253_Nicotinate	0.00667344	0.0994702	2.68633	Total_gastrectomy
C11003_2_4_Dimethylaniline	0.00666729	0.0994702	2.73114	Control
C04137_Octopine	0.00537964	0.0994702	3.26938	Control
C00116_Glycerol	1.93622e-09	6.54441e-07	3.36736	Total_gastrectomy
C00245_Taurine	0.00338399	0.083735	3.63114	Control
C00429_Dihydrouracil	0.000388647	0.0439511	4.76214	Control
*Notes
Mutually enriched despite of type of surgery and enriched in gastrectomy in different annotations
Overlap between different annotations and enriched in gastrectomy
Overlap between different annotations
Mutually enriched despite of type of surgery and enriched in gastrectomy
Enriched in gastrectomy
Enriched in gastrectomy means that the features enriched during the control (n=56) and gastrectomy (n=50) comparison
