# Supplementary material for: Influence of gastrectomy for gastric cancer treatment on faecal microbiome and metabolome profiles
Source: HighWire-hosted journal article supplement (doi:10.1136/gutjnl-2019-319188), 2020-01-16
Supplement: gutjnl-2019-319188supp015_data_supplement.xls [file gutjnl-2019-319188supp015_data_supplement.xls]

## Sheet: Gastric_Acid_Control
Supplementary Table S8. Effect of gastric acid-suppression medication on microbiome and metabolome profiles in the control group (user, n=13; non-user, n=43)
a. Species profiles
mOTU-annotated species	p_valKW	FDR	LDA_score	enrichment
Enterobacteraerogenes	0.0029472	0.0946786	2.95796	Yes
Streptococcussp_C150	0.000547859	0.0587514	3.03347	Yes
Haemophiluspittmaniae	0.000173489	0.0445867	3.13904	Yes
Streptococcusmutans	0.00086009	0.0587514	3.25472	Yes
Streptococcusvestibularis	0.000914418	0.0587514	3.30884	Yes
Veillonellasp_3_1_44	0.00234763	0.0946786	3.34402	Yes
Campylobacterconcisus	0.00276596	0.0946786	3.48024	Yes
Haemophilusparainfluenzae	0.00245267	0.0946786	3.72704	Yes
Haemophilushaemolyticus	0.00356843	0.101898	-	-
Streptococcusparasanguinis	0.00504354	0.102958	-	-
Streptococcussalivarius	0.00535553	0.102958	-	-
Haemophilusinfluenzae	0.00590195	0.102958	-	-
Streptococcusaustralis	0.00592925	0.102958	-	-
Megasphaeramicronuciformis	0.00635948	0.102958	-	-
Actinobacillusureae	0.00637883	0.102958	-	-
Aggregatibactersegnis	0.00640987	0.102958	-	-
Veillonellasp_oraltaxon158	0.00876904	0.127062	-	-
Lactobacillusfermentum	0.00889929	0.127062	-	-
Enterococcusgallinarum	0.011007	0.143339	-	-
Streptococcusinfantis	0.0113097	0.143339	-	-
Veillonellasp_6_1_27	0.0118847	0.143339	-	-
Streptococcussp_C300	0.0122702	0.143339	-	-
Veillonellaparvula	0.014034	0.156815	-	-
Streptococcussp_2_1_36FAA	0.0162806	0.168232	-	-
Veillonelladispar	0.0164399	0.168232	-	-
Streptococcusoralis	0.0170196	0.168232	-	-
RuminococcaceaebacteriumD16	0.0234815	0.223509	-	-
Streptococcussp_oraltaxon056	0.0259543	0.23625	-	-
Acidaminococcussp_D21	0.0266585	0.23625	-	-
Dorealongicatena	0.0301847	0.245551	-	-
Klebsiellapneumoniae	0.0304386	0.245551	-	-
Lachnospiraceaebacterium3_1_57FAA_CT1	0.0305745	0.245551	-	-
Clostridiumsymbiosum	0.033718	0.262592	-	-
Lactobacillussalivarius	0.0373555	0.282364	-	-
Bacteroidessp_4_1_36	0.0445096	0.321235	-	-
Bacteroidesclarus	0.0449979	0.321235	-	-
Veillonellaatypica	0.0466078	0.323735	-	-
Bacteroidessp_2_1_33B	0.0493336	0.333651	-	-
Acidaminococcusintestini	0.0549125	0.361859	-	-
Bifidobacteriumlongum	0.058387	0.36755	-	-
Parabacteroidesdistasonis	0.0586364	0.36755	-	-
Eubacteriumrectale	0.0613014	0.375106	-	-
Streptococcussp_oraltaxon071	0.0658005	0.393273	-	-
Coprococcuscomes	0.0719751	0.40522	-	-
Enterococcusfaecium	0.0735904	0.40522	-	-
Streptococcuspneumoniae	0.0739627	0.40522	-	-
Streptococcusgordonii	0.0743462	0.40522	-	-
Bacteroidesuniformis	0.0756831	0.40522	-	-
butyrate_producingbacteriumSSC_2	0.0783526	0.410951	-	-
Enterococcusfaecalis	0.0859566	0.434751	-	-
Fusobacteriummortiferum	0.0873263	0.434751	-	-
Bacteroidessp_3_1_19	0.0888213	0.434751	-	-
Streptococcussp_M143	0.0914864	0.434751	-	-
Bacteroidessp_2_1_7	0.0925516	0.434751	-	-
Clostridialesbacterium1_7_47FAA	0.0930401	0.434751	-	-
Granulicatellaadiacens	0.0970414	0.445351	-	-
Rothiamucilaginosa	0.10716	0.483161	-	-
Peptostreptococcusstomatis	0.119771	0.517771	-	-
Methanobrevibactersmithii	0.124351	0.517771	-	-
Shigellasp_D9	0.124351	0.517771	-	-
Desulfovibriodesulfuricans	0.124351	0.517771	-	-
Lactococcuslactis	0.12491	0.517771	-	-
Bifidobacteriumdentium	0.132133	0.53902	-	-
Klebsiellaoxytoca	0.136133	0.546658	-	-
Subdoligranulumvariabile	0.147983	0.57701	-	-
Rothiadentocariosa	0.149971	0.57701	-	-
Streptococcussanguinis	0.153577	0.57701	-	-
Streptococcusanginosus	0.153987	0.57701	-	-
Streptococcusmacedonicus	0.158648	0.57701	-	-
Clostridiumsp_L2_50	0.158648	0.57701	-	-
Bacteroidesvulgatus	0.159407	0.57701	-	-
Alistipessp_HGB5	0.167118	0.596518	-	-
Lactobacillusgasseri	0.174674	0.604089	-	-
Oribacteriumsinus	0.176297	0.604089	-	-
Bacteroidescoprophilus	0.176736	0.604089	-	-
Eubacteriumeligens	0.179514	0.604089	-	-
Fusobacteriumperiodonticum	0.184167	0.604089	-	-
Salmonellaenterica	0.18529	0.604089	-	-
Turicibactersp_HGF1	0.185693	0.604089	-	-
Alistipesshahii	0.192554	0.613312	-	-
Parvimonassp_oraltaxon110	0.193301	0.613312	-	-
Eggerthellasp_1_3_56FAA	0.20198	0.633034	-	-
Streptococcussp_M334	0.209452	0.648545	-	-
Clostridiumperfringens	0.215803	0.65087	-	-
Streptococcusmitis	0.217754	0.65087	-	-
Ruminococcussp_5_1_39BFAA	0.217801	0.65087	-	-
Bacteroidessp_D20	0.228818	0.672989	-	-
Klebsiellasp_1_1_55	0.23445	0.672989	-	-
Lachnospiraceaebacterium4_1_37FAA	0.2345	0.672989	-	-
Anaerostipescaccae	0.235685	0.672989	-	-
Ruminococcustorques	0.239392	0.672989	-	-
Clostridiumscindens	0.243066	0.672989	-	-
Turicibactersanguinis	0.243533	0.672989	-	-
Bacteroidescaccae	0.250677	0.682091	-	-
Streptococcusthermophilus	0.252135	0.682091	-	-
Streptococcuspseudopneumoniae	0.256249	0.686001	-	-
Bacteroidesovatus	0.264443	0.700639	-	-
Streptococcusperoris	0.26785	0.702422	-	-
Bacteroidesfluxus	0.271499	0.704801	-	-
Acidaminococcusfermentans	0.275749	0.708676	-	-
Clostridiumsp_M62_1	0.278831	0.709501	-	-
Roseburiahominis	0.281867	0.710195	-	-
Lachnospiraceaebacterium5_1_63FAA	0.288393	0.719583	-	-
Actinomycesodontolyticus	0.298865	0.738543	-	-
Parabacteroidessp_D13	0.306453	0.75008	-	-
Capnocytophagasp_oraltaxon329	0.319931	0.775681	-	-
Bacteroidessp_3_1_40A	0.329906	0.779078	-	-
Ruminococcuschampanellensis	0.332186	0.779078	-	-
Prevotellabuccae	0.336474	0.779078	-	-
Bacteroidesintestinalis	0.341365	0.779078	-	-
Clostridiumramosum	0.341933	0.779078	-	-
Eggerthellasp_HGA1	0.342814	0.779078	-	-
Eubacteriumventriosum	0.34669	0.779078	-	-
Eubacteriumhallii	0.349223	0.779078	-	-
Actinomycesviscosus	0.349303	0.779078	-	-
butyrate_producingbacteriumSS3_4	0.351978	0.779078	-	-
Erysipelotrichaceaebacterium5_2_54FAA	0.363426	0.779078	-	-
Holdemaniafiliformis	0.364378	0.779078	-	-
Escherichiacoli	0.366384	0.779078	-	-
Lachnospiraceaebacterium9_1_43BFAA	0.366536	0.779078	-	-
Ruminococcusobeum	0.371331	0.779078	-	-
Gemellamorbillorum	0.377974	0.779078	-	-
Streptococcuspasteurianus	0.380505	0.779078	-	-
Bacteroidessp_D1	0.380505	0.779078	-	-
Bacteroidessp_20_3	0.386022	0.779078	-	-
Bacteroideseggerthii	0.387112	0.779078	-	-
Lachnospiraceaebacterium1_1_57FAA	0.389515	0.779078	-	-
Anaerotruncuscolihominis	0.396785	0.779078	-	-
Erysipelotrichaceaebacterium3_1_53	0.398068	0.779078	-	-
Coprococcuscatus	0.398821	0.779078	-	-
Bifidobacteriumbifidum	0.400259	0.779078	-	-
Gemellasanguinis	0.406564	0.779078	-	-
Clostridiumsaccharolyticum	0.408655	0.779078	-	-
Burkholderialesbacterium1_1_47	0.414134	0.779078	-	-
Megasphaeraelsdenii	0.416111	0.779078	-	-
Ruminococcussp_SR1_5	0.417695	0.779078	-	-
Lachnospiraceaebacterium2_1_58FAA	0.420575	0.779078	-	-
Ruminococcusgnavus	0.420606	0.779078	-	-
Bifidobacteriumangulatum	0.427086	0.779078	-	-
Bacteroidesdorei	0.427432	0.779078	-	-
Bifidobacteriumpseudocatenulatum	0.427432	0.779078	-	-
Lachnospiraceaebacterium6_1_63FAA	0.434628	0.78577	-	-
Anaerostipessp_3_2_56FAA	0.440768	0.78577	-	-
Streptococcusequinus	0.447668	0.78577	-	-
Cronobactersakazakii	0.447832	0.78577	-	-
Escherichiafergusonii	0.448956	0.78577	-	-
Bacteroidesstercoris	0.452756	0.78577	-	-
Pyramidobacterpiscolens	0.457147	0.78577	-	-
Paraprevotellaxylaniphila	0.457856	0.78577	-	-
Streptococcuscristatus	0.458809	0.78577	-	-
Bifidobacteriumbreve	0.462532	0.78577	-	-
Bacteroidesplebeius	0.464736	0.78577	-	-
Odoribactersplanchnicus	0.475283	0.798351	-	-
Olsenellauli	0.482008	0.80439	-	-
Bifidobacteriumanimalis	0.494698	0.820242	-	-
Bacteroidessp_D2	0.501953	0.82563	-	-
Coprobacillussp_D7	0.504373	0.82563	-	-
Bacteroidescoprocola	0.50879	0.82759	-	-
Eubacteriumlimosum	0.516344	0.834593	-	-
Lachnospiraceaebacterium3_1_46FAA	0.522371	0.839059	-	-
Bacteroidessp_9_1_42FAA	0.530831	0.846562	-	-
Clostridiumsp_7_2_43FAA	0.533839	0.846562	-	-
Pseudoflavonifractorcapillosus	0.54061	0.846562	-	-
Bacteroidessp_3_1_33FAA	0.540929	0.846562	-	-
Sutterellawadsworthensis	0.543512	0.846562	-	-
Bacteroidessp_3_1_23	0.553104	0.848647	-	-
Bacteroidessp_1_1_6	0.553681	0.848647	-	-
Prevotellacopri	0.554758	0.848647	-	-
Shigellaflexneri	0.567322	0.862732	-	-
Bacillussubtilis	0.57538	0.869839	-	-
Fusobacteriumnucleatum	0.582496	0.875447	-	-
Atopobiumparvulum	0.588788	0.876546	-	-
Parvimonasmicra	0.590048	0.876546	-	-
Shigellasonnei	0.600617	0.887119	-	-
Akkermansiamuciniphila	0.620893	0.888223	-	-
Lactobacilluscrispatus	0.625585	0.888223	-	-
Meiothermussilvanus	0.625585	0.888223	-	-
Alistipesputredinis	0.630458	0.888223	-	-
Lachnospiraceaebacterium2_1_46FAA	0.631538	0.888223	-	-
Streptococcusagalactiae	0.636621	0.888223	-	-
Bifidobacteriumcatenulatum	0.637988	0.888223	-	-
Enterobacterhormaechei	0.64194	0.888223	-	-
Solobacteriummoorei	0.64311	0.888223	-	-
Parasutterellaexcrementihominis	0.643696	0.888223	-	-
Clostridiumsp_SS2_1	0.645171	0.888223	-	-
Citrobacteryoungae	0.64573	0.888223	-	-
Bacteroidesfinegoldii	0.646294	0.888223	-	-
Catonellamorbi	0.653737	0.892203	-	-
Clostridiumbartlettii	0.657863	0.892203	-	-
Finegoldiamagna	0.662861	0.892203	-	-
Eubacteriumbiforme	0.663077	0.892203	-	-
Blautiahansenii	0.673438	0.900697	-	-
Clostridiumbolteae	0.676399	0.900697	-	-
Roseburiainulinivorans	0.688447	0.907951	-	-
Collinsellaaerofaciens	0.688913	0.907951	-	-
Clostridiumleptum	0.700346	0.915776	-	-
Prevotelladisiens	0.704304	0.915776	-	-
Aeromonasveronii	0.709171	0.915776	-	-
Clostridiumsp_D5	0.709171	0.915776	-	-
Eubacteriumsiraeum	0.712666	0.915776	-	-
Bacteroidessp_2_2_4	0.71882	0.919088	-	-
Fusobacteriumvarium	0.727259	0.920955	-	-
Collinsellaintestinalis	0.729523	0.920955	-	-
Enterobactercloacae	0.732131	0.920955	-	-
Gemellahaemolysans	0.735724	0.920955	-	-
Enterobacterasburiae	0.738197	0.920955	-	-
Lachnospiraceaebacterium8_1_57FAA	0.748703	0.925214	-	-
Faecalibacteriumprausnitzii	0.748811	0.925214	-	-
Roseburiaintestinalis	0.756303	0.929999	-	-
Blautiahydrogenotrophica	0.769147	0.93357	-	-
Lactobacilluscasei	0.774045	0.93357	-	-
Clostridiumsp_HGF2	0.777797	0.93357	-	-
Bacteroidesthetaiotaomicron	0.778334	0.93357	-	-
Actinomycessp_oraltaxon175	0.780246	0.93357	-	-
Phascolarctobacteriumsuccinatutens	0.781002	0.93357	-	-
Bacteroidessp_2_1_16	0.793789	0.944462	-	-
Coprobacillussp_29_1	0.802295	0.945448	-	-
Citrobactersp_30_2	0.802295	0.945448	-	-
Doreaformicigenerans	0.805654	0.945448	-	-
Bacteroidessp_3_2_5	0.811441	0.947911	-	-
Collinsellastercoris	0.819943	0.953508	-	-
Escherichiaalbertii	0.829167	0.959892	-	-
Streptococcusgallolyticus	0.838222	0.962073	-	-
Streptococcusinfantarius	0.843617	0.962073	-	-
Bacteroidessp_4_3_47FAA	0.84493	0.962073	-	-
Bacteroidessp_2_1_56FAA	0.849428	0.962073	-	-
Clostridiumspiroforme	0.849769	0.962073	-	-
Eggerthellalenta	0.860959	0.965959	-	-
Fusobacteriumulcerans	0.863021	0.965959	-	-
Shigelladysenteriae	0.864709	0.965959	-	-
Lachnospiraceaebacterium5_1_57FAA	0.870369	0.965959	-	-
Klebsiellavariicola	0.873316	0.965959	-	-
Citrobacterkoseri	0.877715	0.965959	-	-
Bacteroidessp_1_1_14	0.884167	0.965959	-	-
Bacteroidesxylanisolvens	0.884238	0.965959	-	-
Ruminococcuslactaris	0.88753	0.965959	-	-
Coprococcuseutactus	0.890787	0.965959	-	-
Ruminococcusbromii	0.898197	0.969902	-	-
Bifidobacteriumadolescentis	0.913997	0.982834	-	-
Eubacteriumdolichum	0.921871	0.983863	-	-
Enterobactercancerogenus	0.924597	0.983863	-	-
Parabacteroidesmerdae	0.930213	0.983863	-	-
Bacteroidessp_1_1_30	0.930267	0.983863	-	-
Bacteroidessp_D22	0.938089	0.986771	-	-
Shigellaboydii	0.947715	0.986771	-	-
Mitsuokellamultacida	0.949146	0.986771	-	-
Bilophilawadsworthia	0.952786	0.986771	-	-
Bifidobacteriumsp_12_1_47BFAA	0.956087	0.986771	-	-
Dialisterinvisus	0.957542	0.986771	-	-
Streptococcusconstellatus	0.959894	0.986771	-	-
Eubacteriumcylindroides	0.982663	0.991839	-	-
Aeromonashydrophila	0.982663	0.991839	-	-
Clostridiumbutyricum	0.982663	0.991839	-	-
Desulfovibriopiger	0.982663	0.991839	-	-
Atopobiumrimae	0.989536	0.991839	-	-
Lachnospiraceaebacterium1_4_56FAA	0.99132	0.991839	-	-
Bacteroidesfragilis	0.991839	0.991839	-	-
MetaPhlan2-annotated species	p_valKW	FDR	LDA_score	enrichment
Streptococcus_mutans	3.76191e-05	0.00895335	3.25709	Yes
Streptococcus_gordonii	0.000207394	0.0246799	2.53674	Yes
Campylobacter_concisus	0.000676168	0.0508195	3.19305	Yes
Megasphaera_micronuciformis	0.000854109	0.0508195	3.15564	Yes
Haemophilus_parainfluenzae	0.00169046	0.0804659	4.0723	Yes
Streptococcus_parasanguinis	0.00279789	0.110983	-	-
Streptococcus_salivarius	0.00360245	0.116147	-	-
Bacteroides_nordii	0.00431555	0.116147	-	-
Atopobium_parvulum	0.00451853	0.116147	-	-
Veillonella_parvula	0.00488012	0.116147	-	-
Streptococcus_vestibularis	0.00752783	0.162875	-	-
Actinobacillus_unclassified	0.00925732	0.176854	-	-
Lactobacillus_salivarius	0.00966008	0.176854	-	-
Veillonella_unclassified	0.0165359	0.281111	-	-
Rothia_dentocariosa	0.0208536	0.330876	-	-
Eubacterium_rectale	0.023636	0.333933	-	-
Fusobacterium_mortiferum	0.0248048	0.333933	-	-
Veillonella_dispar	0.0254818	0.333933	-	-
Eubacterium_brachy	0.0266585	0.333933	-	-
Granulicatella_adiacens	0.0317847	0.368447	-	-
Scardovia_wiggsiae	0.0325101	0.368447	-	-
Alistipes_indistinctus	0.0349254	0.370762	-	-
Citrobacter_freundii	0.03583	0.370762	-	-
Dorea_longicatena	0.0522504	0.501515	-	-
Bifidobacterium_longum	0.0528169	0.501515	-	-
Fusobacterium_nucleatum	0.0556994	0.501515	-	-
Veillonella_atypica	0.0628807	0.501515	-	-
Bacteroides_vulgatus	0.066276	0.501515	-	-
Parabacteroides_goldsteinii	0.0666214	0.501515	-	-
Bifidobacterium_dentium	0.0674275	0.501515	-	-
Alistipes_finegoldii	0.070948	0.501515	-	-
Clostridium_symbiosum	0.0715554	0.501515	-	-
Lachnospiraceae_bacterium_2_1_58FAA	0.0718423	0.501515	-	-
Enterococcus_faecium	0.0735904	0.501515	-	-
Alistipes_onderdonkii	0.0744122	0.501515	-	-
Bacteroides_coprophilus	0.0774985	0.501515	-	-
Streptococcus_infantis	0.0810545	0.501515	-	-
Parabacteroides_distasonis	0.0841848	0.501515	-	-
Fusobacterium_periodonticum	0.0850619	0.501515	-	-
Klebsiella_unclassified	0.0863955	0.501515	-	-
Enterococcus_faecalis	0.0863955	0.501515	-	-
Lactobacillus_gasseri	0.0928177	0.517331	-	-
Rothia_mucilaginosa	0.0962714	0.517331	-	-
Anaerotruncus_unclassified	0.0972645	0.517331	-	-
Turicibacter_unclassified	0.0978146	0.517331	-	-
Bacteroides_dorei	0.112375	0.575815	-	-
Eubacterium_eligens	0.113711	0.575815	-	-
Coprobacter_fastidiosus	0.116522	0.577756	-	-
Clostridium_nexile	0.119771	0.581743	-	-
Bacteroides_clarus	0.124351	0.589336	-	-
Actinomyces_odontolyticus	0.126286	0.589336	-	-
Bacteroides_xylanisolvens	0.135197	0.614098	-	-
Acidaminococcus_unclassified	0.138333	0.614098	-	-
Streptococcus_anginosus	0.140412	0.614098	-	-
Coprococcus_comes	0.141913	0.614098	-	-
Gemella_sanguinis	0.149971	0.625661	-	-
Brachyspira_unclassified	0.158648	0.625661	-	-
Mitsuokella_unclassified	0.158648	0.625661	-	-
Methanobrevibacter_smithii	0.158648	0.625661	-	-
Klebsiella_oxytoca	0.161016	0.625661	-	-
Lactobacillus_fermentum	0.162987	0.625661	-	-
Actinomyces_graevenitzii	0.162987	0.625661	-	-
Bifidobacterium_pseudocatenulatum	0.170781	0.639881	-	-
Parabacteroides_johnsonii	0.172069	0.639881	-	-
Clostridium_citroniae	0.18297	0.66995	-	-
Bacteroides_intestinalis	0.19121	0.685201	-	-
Gemella_haemolysans	0.192893	0.685201	-	-
Erysipelotrichaceae_bacterium_3_1_53	0.202308	0.708078	-	-
Alloscardovia_omnicolens	0.205311	0.708175	-	-
Ruminococcaceae_bacterium_D16	0.21943	0.709677	-	-
Turicibacter_sanguinis	0.223596	0.709677	-	-
Oribacterium_sinus	0.223624	0.709677	-	-
Peptostreptococcus_stomatis	0.223624	0.709677	-	-
Clostridium_ramosum	0.223628	0.709677	-	-
Lactobacillus_casei_paracasei	0.223638	0.709677	-	-
Clostridium_hathewayi	0.229002	0.717139	-	-
Megasphaera_unclassified	0.239151	0.728177	-	-
Ruminococcus_torques	0.240358	0.728177	-	-
Streptococcus_thermophilus	0.241706	0.728177	-	-
Parvimonas_unclassified	0.25483	0.741185	-	-
Eubacterium_limosum	0.25848	0.741185	-	-
Mitsuokella_multacida	0.25848	0.741185	-	-
Neisseria_unclassified	0.25848	0.741185	-	-
Granulicatella_unclassified	0.264905	0.750202	-	-
Streptococcus_cristatus	0.267929	0.750202	-	-
Bifidobacterium_breve	0.275749	0.754992	-	-
Klebsiella_pneumoniae	0.2817	0.754992	-	-
Clostridiales_bacterium_1_7_47FAA	0.291832	0.754992	-	-
Bacteroides_faecis	0.301324	0.754992	-	-
Roseburia_hominis	0.309729	0.754992	-	-
Clostridium_perfringens	0.315126	0.754992	-	-
Eggerthella_unclassified	0.320937	0.754992	-	-
Bacteroides_salyersiae	0.330226	0.754992	-	-
Holdemania_filiformis	0.331591	0.754992	-	-
Citrobacter_koseri	0.332186	0.754992	-	-
Holdemania_unclassified	0.332186	0.754992	-	-
Gemella_morbillorum	0.332186	0.754992	-	-
Clostridium_butyricum	0.332186	0.754992	-	-
Streptococcus_lutetiensis	0.332186	0.754992	-	-
Lactobacillus_crispatus	0.332186	0.754992	-	-
Lactobacillus_mucosae	0.332186	0.754992	-	-
Bacteroides_sp_4_3_47FAA	0.332186	0.754992	-	-
Clostridium_sp_ATCC_BAA_442	0.336474	0.754992	-	-
Corynebacterium_durum	0.336474	0.754992	-	-
Citrobacter_unclassified	0.339073	0.754992	-	-
Paraprevotella_unclassified	0.345029	0.754992	-	-
Erysipelotrichaceae_bacterium_2_2_44A	0.348704	0.754992	-	-
Peptostreptococcus_unclassified	0.358224	0.754992	-	-
Flavonifractor_plautii	0.361203	0.754992	-	-
Bacteroides_massiliensis	0.367804	0.754992	-	-
Prevotella_stercorea	0.370627	0.754992	-	-
Bacillus_subtilis	0.370627	0.754992	-	-
Anaerotruncus_colihominis	0.371732	0.754992	-	-
Erysipelotrichaceae_bacterium_6_1_45	0.372198	0.754992	-	-
Eubacterium_ramulus	0.38549	0.754992	-	-
Lachnospiraceae_bacterium_5_1_57FAA	0.385552	0.754992	-	-
Subdoligranulum_unclassified	0.387813	0.754992	-	-
Lachnospiraceae_bacterium_5_1_63FAA	0.393013	0.754992	-	-
Paraprevotella_xylaniphila	0.393941	0.754992	-	-
Lachnospiraceae_bacterium_7_1_58FAA	0.397233	0.754992	-	-
Paraprevotella_clara	0.398068	0.754992	-	-
Catenibacterium_mitsuokai	0.398969	0.754992	-	-
Odoribacter_unclassified	0.398969	0.754992	-	-
Anaerostipes_unclassified	0.399681	0.754992	-	-
Odoribacter_splanchnicus	0.402595	0.754992	-	-
Eubacterium_hallii	0.40773	0.754992	-	-
Bacteroides_coprocola	0.408503	0.754992	-	-
Gordonibacter_pamelaeae	0.408655	0.754992	-	-
Ruminococcus_gnavus	0.409218	0.754992	-	-
Bacteroides_caccae	0.418691	0.758656	-	-
Oscillibacter_unclassified	0.420161	0.758656	-	-
Peptostreptococcaceae_noname_unclassified	0.420767	0.758656	-	-
Bacteroides_finegoldii	0.428856	0.767427	-	-
Ruminococcus_obeum	0.437321	0.776735	-	-
Rothia_unclassified	0.447832	0.789512	-	-
Megamonas_unclassified	0.454719	0.790123	-	-
Bacteroides_uniformis	0.454819	0.790123	-	-
Bacteroidales_bacterium_ph8	0.461016	0.795086	-	-
Bacteroides_plebeius	0.468679	0.802487	-	-
Streptococcus_constellatus	0.492948	0.828665	-	-
Clostridium_clostridioforme	0.496744	0.828665	-	-
Streptococcus_mitis_oralis_pneumoniae	0.498125	0.828665	-	-
Lachnospiraceae_bacterium_3_1_57FAA_CT1	0.49902	0.828665	-	-
Faecalibacterium_prausnitzii	0.509296	0.828665	-	-
Acidaminococcus_fermentans	0.510144	0.828665	-	-
Coprobacillus_unclassified	0.510662	0.828665	-	-
Alistipes_senegalensis	0.511983	0.828665	-	-
Butyricicoccus_pullicaecorum	0.515304	0.828665	-	-
Bifidobacterium_bifidum	0.523458	0.836127	-	-
Coprococcus_catus	0.529936	0.840832	-	-
Alistipes_shahii	0.533756	0.841285	-	-
Atopobium_rimae	0.538914	0.843826	-	-
Streptococcus_sanguinis	0.571325	0.888728	-	-
Enterobacter_cloacae	0.58235	0.899566	-	-
Eubacterium_sp_3_1_31	0.587703	0.899566	-	-
Eubacterium_ventriosum	0.589631	0.899566	-	-
Bacteroides_fragilis	0.599489	0.901034	-	-
Desulfovibrio_desulfuricans	0.600617	0.901034	-	-
Lachnospiraceae_bacterium_1_1_57FAA	0.601951	0.901034	-	-
Ruminococcus_lactaris	0.607402	0.903511	-	-
Dialister_invisus	0.617795	0.908584	-	-
Blautia_producta	0.624959	0.908584	-	-
Megasphaera_elsdenii	0.625585	0.908584	-	-
Enterococcus_avium	0.636621	0.908584	-	-
Sutterella_parvirubra	0.636621	0.908584	-	-
Eubacterium_dolichum	0.636621	0.908584	-	-
Escherichia_coli	0.638769	0.908584	-	-
Parabacteroides_unclassified	0.643746	0.908584	-	-
Roseburia_inulinivorans	0.645171	0.908584	-	-
Lactococcus_lactis	0.651409	0.911972	-	-
Dorea_unclassified	0.662861	0.922578	-	-
Coprococcus_sp_ART55_1	0.672515	0.926925	-	-
Eubacterium_biforme	0.681239	0.926925	-	-
Escherichia_unclassified	0.687908	0.926925	-	-
Bacteroides_stercoris	0.687908	0.926925	-	-
Streptococcus_tigurinus	0.69771	0.926925	-	-
Acidaminococcus_intestini	0.705673	0.926925	-	-
Collinsella_tanakaei	0.709171	0.926925	-	-
Propionibacterium_phage_PAD20	0.709171	0.926925	-	-
Desulfovibrio_piger	0.709171	0.926925	-	-
Clostridium_asparagiforme	0.712016	0.926925	-	-
Barnesiella_intestinihominis	0.712666	0.926925	-	-
Sutterella_wadsworthensis	0.71272	0.926925	-	-
Bacteroides_thetaiotaomicron	0.719323	0.929951	-	-
Fusobacterium_varium	0.722861	0.929951	-	-
Eubacterium_siraeum	0.730445	0.93046	-	-
Bifidobacterium_adolescentis	0.731076	0.93046	-	-
Ruminococcus_sp_5_1_39BFAA	0.735733	0.931407	-	-
Fusobacterium_ulcerans	0.747663	0.935562	-	-
Bacteroides_ovatus	0.748579	0.935562	-	-
Lachnospiraceae_bacterium_9_1_43BFAA	0.755655	0.935562	-	-
Prevotella_copri	0.75614	0.935562	-	-
Bifidobacterium_animalis	0.75867	0.935562	-	-
Eubacterium_infirmum	0.774045	0.940647	-	-
Abiotrophia_defectiva	0.774107	0.940647	-	-
Lachnospiraceae_bacterium_8_1_57FAA	0.774651	0.940647	-	-
Lachnospiraceae_bacterium_1_4_56FAA	0.785825	0.944984	-	-
Burkholderiales_bacterium_1_1_47	0.797262	0.944984	-	-
Parvimonas_micra	0.800026	0.944984	-	-
Bilophila_unclassified	0.80456	0.944984	-	-
Clostridium_bartlettii	0.809957	0.944984	-	-
Eggerthella_lenta	0.812787	0.944984	-	-
Megamonas_funiformis	0.816137	0.944984	-	-
Megamonas_rupellensis	0.819943	0.944984	-	-
Finegoldia_magna	0.829167	0.944984	-	-
Lachnospiraceae_bacterium_2_1_46FAA	0.829167	0.944984	-	-
Lachnospiraceae_bacterium_3_1_46FAA	0.830958	0.944984	-	-
Alistipes_putredinis	0.830958	0.944984	-	-
Phascolarctobacterium_succinatutens	0.832077	0.944984	-	-
Roseburia_unclassified	0.833809	0.944984	-	-
Bilophila_wadsworthia	0.84253	0.950342	-	-
Parabacteroides_merdae	0.860268	0.962479	-	-
Alistipes_unclassified	0.861561	0.962479	-	-
Dorea_formicigenerans	0.865423	0.962479	-	-
Ruminococcus_bromii	0.878808	0.968635	-	-
Raoultella_ornithinolytica	0.879097	0.968635	-	-
Collinsella_aerofaciens	0.89012	0.968937	-	-
Gemella_unclassified	0.894863	0.968937	-	-
Roseburia_intestinalis	0.894866	0.968937	-	-
Parasutterella_excrementihominis	0.895656	0.968937	-	-
Bacteroides_cellulosilyticus	0.903579	0.973086	-	-
Clostridiaceae_bacterium_JC118	0.921871	0.977494	-	-
Pantoea_unclassified	0.921871	0.977494	-	-
Solobacterium_moorei	0.926165	0.977494	-	-
Erysipelotrichaceae_bacterium_21_3	0.927827	0.977494	-	-
Anaerostipes_hadrus	0.928209	0.977494	-	-
Megamonas_hypermegale	0.93952	0.982217	-	-
Pseudomonas_unclassified	0.948021	0.982217	-	-
Anaerostipes_caccae	0.953646	0.982217	-	-
Ruminococcus_callidus	0.954139	0.982217	-	-
Clostridium_leptum	0.959463	0.982217	-	-
Streptococcus_australis	0.959463	0.982217	-	-
Blautia_hydrogenotrophica	0.967645	0.982217	-	-
Bacteroides_eggerthii	0.969463	0.982217	-	-
Akkermansia_muciniphila	0.972474	0.982217	-	-
Adlercreutzia_equolifaciens	0.973963	0.982217	-	-
Clostridium_bolteae	0.992242	0.996429	-	-
Bifidobacterium_catenulatum	1	1	-	-
b. KEGG modules annotated by in house pipeline
Modules	p_valKW	FDR	LDA_score	enrichment	Definitions
M00442	0.00678141	0.0955581	2.01826	Yes	Putative hydroxymethylpyrimidine transport system
M00635	0.00118377	0.0529003	2.11898	Yes	Tetracycline resistance, TetAB(46) transporter
M00307	0.00678519	0.0955581	2.15698	Yes	Pyruvate oxidation, pyruvate => acetyl-CoA
M00807	0.00126624	0.0529003	2.18363	Yes	PTS system, galactose-specific II component
M00533	0.00632735	0.0955581	2.19286	Yes	Homoprotocatechuate degradation, homoprotocatechuate => 2-oxohept-3-enedioate
M00521	0.00645795	0.0955581	2.2296	Yes	CiaH-CiaR two-component regulatory system
M00453	0.00140859	0.0529003	2.25046	Yes	QseC-QseB (quorum sensing) two-component regulatory system
M00728	0.00212934	0.0553629	2.26236	Yes	Cationic antimicrobial peptide (CAMP) resistance, envelope protein folding and degrading factors DegP and DsbA
M00447	0.00212934	0.0553629	2.26236	Yes	CpxA-CpxR (envelope stress response) two-component regulatory system
M00191	0.00269891	0.06507	2.28007	Yes	Thiamine transport system
M00472	0.000215167	0.0413058	2.29041	Yes	NarQ-NarP (nitrate respiration) two-component regulatory system
M00229	0.000636685	0.0430399	2.30918	Yes	Arginine transport system
M00317	0.0004693	0.0413058	2.31406	Yes	Manganese/iron transport system
M00791	0.00120497	0.0529003	2.33084	Yes	Manganese/zinc transport system
M00481	0.00308023	0.06507	2.33957	Yes	LiaS-LiaR (cell wall stress response) two-component regulatory system
M00754	0.00308023	0.06507	2.33957	Yes	Nisin resistance, phage shock protein homolog LiaH
M00324	0.00196554	0.0553629	2.39335	Yes	Dipeptide transport system
M00456	0.000381207	0.0413058	2.39418	Yes	ArcB-ArcA (anoxic redox control) two-component regulatory system
M00272	0.00504354	0.0897219	2.40124	Yes	PTS system, beta-glucoside (arbutin/salicin/cellobiose)-specific II component
M00303	0.00504354	0.0897219	2.4544	Yes	PTS system, N-acetylmuramic acid-specific II component
M00265	0.00474808	0.0897219	2.50329	Yes	PTS system, glucose-specific II component
M00739	0.000488827	0.0413058	2.55861	Yes	Cationic peptide transport system
M00632	0.00678519	0.0955581	2.84589	No	Galactose degradation, Leloir pathway, galactose => alpha-D-glucose-1P
M00708	0.00156992	0.0530632	-	-	Multidrug resistance, PatAB transporter
M00495	0.00783723	0.104953	-	-	AgrC-AgrA (exoprotein synthesis) two-component regulatory system
M00334	0.00807333	0.104953	-	-	Type VI secretion system
M00259	0.00854788	0.107007	-	-	Heme transport system
M00706	0.010712	0.129309	-	-	Multidrug resistance, EfrAB transporter
M00246	0.0119661	0.139467	-	-	Nickel transport system
M00365	0.0133171	0.147871	-	-	C10-C20 isoprenoid biosynthesis, archaea
M00496	0.0135622	0.147871	-	-	ComD-ComE (competence) two-component regulatory system
M00344	0.0150456	0.158919	-	-	Formaldehyde assimilation, xylulose monophosphate pathway
M00270	0.0165433	0.169444	-	-	PTS system, trehalose-specific II component
M00095	0.0182165	0.172221	-	-	C5 isoprenoid biosynthesis, mevalonate pathway
M00668	0.0186699	0.172221	-	-	Tetracycline resistance, TetA transporter
M00193	0.0193622	0.172221	-	-	Putative spermidine/putrescine transport system
M00268	0.0193622	0.172221	-	-	PTS system, alpha-glucoside-specific II component
M00245	0.0193622	0.172221	-	-	Cobalt/nickel transport system
M00530	0.0203909	0.176721	-	-	Dissimilatory nitrate reduction, nitrate => ammonia
M00438	0.0228563	0.190587	-	-	Nitrate/nitrite transport system
M00302	0.0231185	0.190587	-	-	2-Aminoethylphosphonate transport system
M00209	0.0237681	0.191276	-	-	Osmoprotectant transport system
M00173	0.0262803	0.206575	-	-	Reductive citrate cycle (Arnon-Buchanan cycle)
M00468	0.0269996	0.207406	-	-	SaeS-SaeR (staphylococcal virulence regulation) two-component regulatory system
M00281	0.0276203	0.207459	-	-	PTS system, lactose-specific II component
M00120	0.0285666	0.209903	-	-	Coenzyme A biosynthesis, pantothenate => CoA
M00806	0.0304778	0.214614	-	-	PTS system, maltose-specific II component
M00283	0.0304778	0.214614	-	-	PTS system, ascorbate-specific II component
M00628	0.0347775	0.238307	-	-	beta-Lactam resistance, AmpC system
M00767	0.0352525	0.238307	-	-	Multidrug resistance, efflux pump OqxAB
M00490	0.0360178	0.238707	-	-	MalK-MalR (malate transport) two-component regulatory system
M00454	0.0369606	0.240244	-	-	KdpD-KdpE (potassium transport) two-component regulatory system
M00457	0.0404577	0.255161	-	-	TctE-TctD (tricarboxylic acid transport) two-component regulatory system
M00319	0.0407654	0.255161	-	-	Manganese/zinc/iron transport system
M00238	0.0445824	0.273979	-	-	D-Methionine transport system
M00458	0.0454708	0.274449	-	-	ResE-ResD (aerobic and anaerobic respiration) two-component regulatory system
M00122	0.0488659	0.289766	-	-	Cobalamin biosynthesis, cobinamide => cobalamin
M00333	0.0534896	0.311715	-	-	Type IV secretion system
M00551	0.0556994	0.319092	-	-	Benzoate degradation, benzoate => catechol / methylbenzoate => methylcatechol
M00793	0.0584731	0.329399	-	-	dTDP-L-rhamnose biosynthesis
M00709	0.0621734	0.342552	-	-	Macrolide resistance, MacAB-TolC transporter
M00545	0.062835	0.342552	-	-	Trans-cinnamate degradation, trans-cinnamate => acetyl-CoA
M00429	0.0666667	0.357672	-	-	Competence-related DNA transformation transporter
M00136	0.0692416	0.361918	-	-	GABA biosynthesis, prokaryotes, putrescine => GABA
M00150	0.0695995	0.361918	-	-	Fumarate reductase, prokaryotes
M00244	0.0724665	0.36644	-	-	Putative zinc/manganese transport system
M00276	0.0726375	0.36644	-	-	PTS system, mannose-specific II component
M00452	0.075444	0.371228	-	-	CusS-CusR (copper tolerance) two-component regulatory system
M00610	0.0757832	0.371228	-	-	PTS system, D-glucosaminate-specific II component
M00394	0.0790392	0.381646	-	-	RNA degradosome
M00362	0.082408	0.392308	-	-	Nucleotide sugar biosynthesis, prokaryotes
M00552	0.0858923	0.402459	-	-	D-galactonate degradation, De Ley-Doudoroff pathway, D-galactonate => glycerate-3P
M00305	0.0875929	0.402459	-	-	PTS system, 2-O-A-mannosyl-D-glycerate-specific II component
M00486	0.088246	0.402459	-	-	CitA-CitB (citrate fermentation) two-component regulatory system
M00213	0.0893031	0.402459	-	-	L-Arabinose transport system
M00620	0.0932178	0.40919	-	-	Incomplete reductive citrate cycle, acetyl-CoA => oxoglutarate
M00169	0.0932178	0.40919	-	-	CAM (Crassulacean acid metabolism), light
M00724	0.0952149	0.410492	-	-	Cationic antimicrobial peptide (CAMP) resistance, palmitoyl transferase PagP
M00761	0.0959433	0.410492	-	-	Undecaprenylphosphate alpha-L-Ara4N biosynthesis, UDP-GlcA => undecaprenyl phosphate alpha-L-Ara4N
M00590	0.10092	0.421382	-	-	Erythritol transport system
M00080	0.10441	0.421382	-	-	Lipopolysaccharide biosynthesis, inner core => outer core => O-antigen
M00300	0.10441	0.421382	-	-	Putrescine transport system
M00568	0.104444	0.421382	-	-	Catechol ortho-cleavage, catechol => 3-oxoadipate
M00275	0.105137	0.421382	-	-	PTS system, cellobiose-specific II component
M00443	0.105969	0.421382	-	-	SenX3-RegX3 (phosphate starvation response) two-component regulatory system
M00342	0.108035	0.424602	-	-	Bacterial proteasome
M00121	0.109369	0.424904	-	-	Heme biosynthesis, glutamate => protoheme/siroheme
M00032	0.111086	0.426672	-	-	Lysine degradation, lysine => saccharopine => acetoacetyl-CoA
M00254	0.113734	0.431659	-	-	ABC-2 type transport system
M00740	0.114939	0.431659	-	-	Methylaspartate cycle
M00600	0.120316	0.446887	-	-	alpha-1,4-Digalacturonate transport system
M00506	0.122875	0.447126	-	-	CheA-CheYBV (chemotaxis) two-component regulatory system
M00555	0.124705	0.447126	-	-	Betaine biosynthesis, choline => betaine
M00477	0.129499	0.447126	-	-	EvgS-EvgA (acid and drug tolerance) two-component regulatory system
M00192	0.129927	0.447126	-	-	Putative thiamine transport system
M00459	0.13258	0.447126	-	-	VicK-VicR (cell wall metabolism) two-component regulatory system
M00589	0.13258	0.447126	-	-	Putative lysine transport system
M00723	0.137285	0.447126	-	-	Cationic antimicrobial peptide (CAMP) resistance, ethanolaminephosphotransferase EptB
M00657	0.13765	0.447126	-	-	VanS-VanR (VanE type vancomycin resistance) two-component regulatory system
M00225	0.138819	0.447126	-	-	Lysine/arginine/ornithine transport system
M00194	0.141471	0.447126	-	-	Maltose/maltodextrin transport system
M00529	0.141775	0.447126	-	-	Denitrification, nitrate => nitrogen
M00417	0.142546	0.447126	-	-	Cytochrome o ubiquinol oxidase
M00444	0.142714	0.447126	-	-	PhoQ-PhoP (magnesium transport) two-component regulatory system
M00744	0.142714	0.447126	-	-	Cationic antimicrobial peptide (CAMP) resistance, protease PgtE
M00199	0.142869	0.447126	-	-	L-Arabinose/lactose transport system
M00050	0.142869	0.447126	-	-	Guanine ribonucleotide biosynthesis IMP => GDP,GTP
M00237	0.142869	0.447126	-	-	Branched-chain amino acid transport system
M00479	0.146162	0.451919	-	-	DesK-DesR (membrane lipid fluidity regulation) two-component regulatory system
M00241	0.149844	0.451919	-	-	Vitamin B12 transport system
M00450	0.150378	0.451919	-	-	BaeS-BaeR (envelope stress response) two-component regulatory system
M00645	0.150378	0.451919	-	-	Multidrug resistance, efflux pump SmeABC
M00474	0.152674	0.451919	-	-	RcsC-RcsD-RcsB (capsule synthesis) two-component regulatory system
M00266	0.153759	0.451919	-	-	PTS system, maltose/glucose-specific II component
M00119	0.153759	0.451919	-	-	Pantothenate biosynthesis, valine/L-aspartate => pantothenate
M00497	0.159186	0.456689	-	-	GlnL-GlnG (nitrogen regulation) two-component regulatory system
M00525	0.159436	0.456689	-	-	Lysine biosynthesis, acetyl-DAP pathway, aspartate => lysine
M00239	0.159436	0.456689	-	-	Peptides/nickel transport system
M00226	0.167118	0.474671	-	-	Histidine transport system
M00722	0.170171	0.479314	-	-	Cationic antimicrobial peptide (CAMP) resistance, ethanolaminephosphotransferase EptA
M00166	0.176297	0.487953	-	-	Reductive pentose phosphate cycle, ribulose-5P => glyceraldehyde-3P
M00222	0.177417	0.487953	-	-	Phosphate transport system
M00204	0.177569	0.487953	-	-	Trehalose/maltose transport system
M00298	0.180547	0.492137	-	-	Multidrug/hemolysin transport system
M00475	0.183039	0.492874	-	-	BarA-UvrY (central carbon metabolism) two-component regulatory system
M00207	0.183734	0.492874	-	-	Putative multiple sugar transport system
M00189	0.190216	0.498263	-	-	Molybdate transport system
M00064	0.190216	0.498263	-	-	ADP-L-glycero-D-manno-heptose biosynthesis
M00473	0.192227	0.498263	-	-	UhpB-UhpA (hexose phosphates uptake) two-component regulatory system
M00231	0.19229	0.498263	-	-	Octopine/nopaline transport system
M00451	0.193114	0.498263	-	-	BasS-BasR (antimicrobial peptide resistance) two-component regulatory system
M00020	0.196866	0.502519	-	-	Serine biosynthesis, glycerate-3P => serine
M00696	0.200053	0.502519	-	-	Multidrug resistance, efflux pump AcrEF-TolC
M00306	0.203676	0.502519	-	-	PTS system, fructose-specific II-like component
M00045	0.203684	0.502519	-	-	Histidine degradation, histidine => N-formiminoglutamate => glutamate
M00212	0.203684	0.502519	-	-	Ribose transport system
M00585	0.203684	0.502519	-	-	L-Cystine transport system
M00271	0.210672	0.511301	-	-	PTS system, beta-glucoside-specific II component
M00502	0.213732	0.511301	-	-	GlrK-GlrR (amino sugar metabolism) two-component regulatory system
M00219	0.217801	0.511301	-	-	AI-2 transport system
M00234	0.217832	0.511301	-	-	Cystine transport system
M00175	0.217832	0.511301	-	-	Nitrogen fixation, nitrogen => ammonia
M00742	0.217832	0.511301	-	-	Aminoglycoside resistance, protease FtsH
M00280	0.217832	0.511301	-	-	PTS system, glucitol/sorbitol-specific II component
M00449	0.234301	0.546165	-	-	CreC-CreB (phosphate regulation) two-component regulatory system
M00697	0.237021	0.54872	-	-	Multidrug resistance, efflux pump MdtEF-TolC
M00374	0.240358	0.552659	-	-	Dicarboxylate-hydroxybutyrate cycle
M00701	0.249294	0.569334	-	-	Multidrug resistance, efflux pump EmrAB
M00603	0.256258	0.569375	-	-	Putative aldouronate transport system
M00017	0.256258	0.569375	-	-	Methionine biosynthesis, apartate => homoserine => methionine
M00461	0.260608	0.569375	-	-	MtrB-MtrA (osmotic stress response) two-component regulatory system
M00601	0.261748	0.569375	-	-	Putative chitobiose transport system
M00403	0.263032	0.569375	-	-	HRD1/SEL1 ERAD complex
M00400	0.263032	0.569375	-	-	p97-Ufd1-Npl4 complex
M00022	0.264476	0.569375	-	-	Shikimate pathway, phosphoenolpyruvate + erythrose-4P => chorismate
M00817	0.264476	0.569375	-	-	Lantibiotic transport system
M00707	0.264476	0.569375	-	-	Multidrug resistance, MdlAB/SmdAB transporter
M00446	0.266158	0.569375	-	-	RstB-RstA two-component regulatory system
M00159	0.272874	0.576447	-	-	V/A-type ATPase, prokaryotes
M00269	0.272874	0.576447	-	-	PTS system, sucrose-specific II component
M00746	0.279625	0.576552	-	-	Multidrug resistance, repression of porin OmpF
M00233	0.281289	0.576552	-	-	Glutamate transport system
M00016	0.281453	0.576552	-	-	Lysine biosynthesis, succinyl-DAP pathway, aspartate => lysine
M00208	0.281453	0.576552	-	-	Glycine betaine/proline transport system
M00214	0.281453	0.576552	-	-	Methyl-galactoside transport system
M00228	0.285802	0.581934	-	-	Putative glutamine transport system
M00273	0.290213	0.587377	-	-	PTS system, fructose-specific II component
M00488	0.29319	0.589871	-	-	DcuS-DcuR (C4-dicarboxylate metabolism) two-component regulatory system
M00331	0.299155	0.59479	-	-	Type II general secretion pathway
M00183	0.299155	0.59479	-	-	RNA polymerase, bacteria
M00648	0.305903	0.60465	-	-	Multidrug resistance, efflux pump MdtABC
M00715	0.309298	0.60646	-	-	Lincosamide resistance, efflux pump LmrB
M00471	0.317419	0.60646	-	-	NarX-NarL (nitrate respiration) two-component regulatory system
M00133	0.317584	0.60646	-	-	Polyamine biosynthesis, arginine => agmatine => putrescine => spermidine
M00221	0.317584	0.60646	-	-	Putative simple sugar transport system
M00005	0.317584	0.60646	-	-	PRPP biosynthesis, ribose 5P => PRPP
M00006	0.317584	0.60646	-	-	Pentose phosphate pathway, oxidative phase, glucose 6P => ribulose 5P
M00051	0.327072	0.6176	-	-	Uridine monophosphate biosynthesis, glutamine (+ PRPP) => UMP
M00554	0.327072	0.6176	-	-	Nucleotide sugar biosynthesis, galactose => UDP-galactose
M00135	0.332186	0.623771	-	-	GABA biosynthesis, eukaryotes, putrescine => GABA
M00500	0.334188	0.623961	-	-	AtoS-AtoC (cPHB biosynthesis) two-component regulatory system
M00747	0.336742	0.623961	-	-	Bacitracin transport system
M00712	0.337825	0.623961	-	-	Multidrug resistance, efflux pump YkkCD
M00124	0.346594	0.629833	-	-	Pyridoxal biosynthesis, erythrose-4P => pyridoxal-5P
M00526	0.346594	0.629833	-	-	Lysine biosynthesis, DAP dehydrogenase pathway, aspartate => lysine
M00157	0.346594	0.629833	-	-	F-type ATPase, prokaryotes and chloroplasts
M00727	0.356546	0.634423	-	-	Cationic antimicrobial peptide (CAMP) resistance, N-acetylmuramoyl-L-alanine amidase AmiA and AmiC
M00527	0.356628	0.634423	-	-	Lysine biosynthesis, DAP aminotransferase pathway, aspartate => lysine
M00357	0.356628	0.634423	-	-	Methanogenesis, acetate => methane
M00250	0.356628	0.634423	-	-	Lipopolysaccharide transport system
M00008	0.360871	0.638609	-	-	Entner-Doudoroff pathway, glucose-6P => glyceraldehyde-3P + pyruvate
M00115	0.366843	0.639139	-	-	NAD biosynthesis, aspartate => NAD
M00256	0.366843	0.639139	-	-	Cell division transport system
M00596	0.366843	0.639139	-	-	Dissimilatory sulfate reduction, sulfate => H2S
M00813	0.377238	0.640737	-	-	Lantibiotic transport system
M00258	0.377238	0.640737	-	-	Putative ABC transport system
M00096	0.377238	0.640737	-	-	C5 isoprenoid biosynthesis, non-mevalonate pathway
M00205	0.377238	0.640737	-	-	N-Acetylglucosamine transport system
M00439	0.377238	0.640737	-	-	Oligopeptide transport system
M00014	0.380505	0.643054	-	-	Glucuronate pathway (uronate pathway)
M00519	0.387813	0.648916	-	-	YesM-YesN two-component regulatory system
M00176	0.387813	0.648916	-	-	Assimilatory sulfate reduction, sulfate => H2S
M00230	0.398559	0.65715	-	-	Glutamate/aspartate transport system
M00809	0.398567	0.65715	-	-	PTS system, glucose-specific II component
M00134	0.398567	0.65715	-	-	Polyamine biosynthesis, arginine => ornithine => putrescine
M00652	0.409491	0.665234	-	-	Vancomycin resistance, D-Ala-D-Ser type
M00236	0.409499	0.665234	-	-	Putative polar amino acid transport system
M00149	0.409499	0.665234	-	-	Succinate dehydrogenase, prokaryotes
M00721	0.411343	0.665234	-	-	Cationic antimicrobial peptide (CAMP) resistance, arnBCADTEF operon
M00287	0.420606	0.676976	-	-	PTS system, galactosamine-specific II component
M00190	0.431889	0.691841	-	-	Iron(III) transport system
M00172	0.443345	0.703524	-	-	C4-dicarboxylic acid cycle, NADP - malic enzyme type
M00125	0.443345	0.703524	-	-	Riboflavin biosynthesis, GTP => riboflavin/FMN/FAD
M00349	0.453697	0.711948	-	-	Microcin C transport system
M00223	0.454973	0.711948	-	-	Phosphonate transport system
M00093	0.454973	0.711948	-	-	Phosphatidylethanolamine (PE) biosynthesis, PA => PS => PE
M00011	0.46677	0.723708	-	-	Citrate cycle, second carbon oxidation, 2-oxoglutarate => oxaloacetate
M00627	0.46677	0.723708	-	-	beta-Lactam resistance, Bla system
M00651	0.478736	0.732184	-	-	Vancomycin resistance, D-Ala-D-Lac type
M00346	0.478736	0.732184	-	-	Formaldehyde assimilation, serine pathway
M00436	0.478736	0.732184	-	-	Sulfonate transport system
M00631	0.490867	0.747356	-	-	D-Galacturonate degradation (bacteria), D-galacturonate => pyruvate + D-glyceraldehyde 3P
M00711	0.502547	0.7492	-	-	Multidrug resistance, efflux pump MdtIJ
M00572	0.503161	0.7492	-	-	Pimeloyl-ACP biosynthesis, BioC-BioH pathway, malonyl-ACP => pimeloyl-ACP
M00202	0.503161	0.7492	-	-	Oligogalacturonide transport system
M00277	0.503161	0.7492	-	-	PTS system, N-acetylgalactosamine-specific II component
M00299	0.503161	0.7492	-	-	Spermidine/putrescine transport system
M00227	0.515587	0.754451	-	-	Glutamine transport system
M00255	0.515616	0.754451	-	-	Lipoprotein-releasing system
M00253	0.515616	0.754451	-	-	Sodium transport system
M00435	0.515616	0.754451	-	-	Taurine transport system
M00117	0.518634	0.755387	-	-	Ubiquinone biosynthesis, prokaryotes, chorismate => ubiquinone
M00356	0.520725	0.755387	-	-	Methanogenesis, methanol => methane
M00816	0.528229	0.759751	-	-	NisK-NisR (lantibiotic biosynthesis) two-component regulatory system
M00220	0.528229	0.759751	-	-	Rhamnose transport system
M00492	0.53435	0.765297	-	-	LytS-LytR two-component regulatory system
M00445	0.54097	0.768308	-	-	EnvZ-OmpR (osmotic stress response) two-component regulatory system
M00580	0.540998	0.768308	-	-	Pentose phosphate pathway, archaea, fructose 6P => ribose 5P
M00586	0.553681	0.773655	-	-	Putative amino-acid transport system
M00249	0.553796	0.773655	-	-	Capsular polysaccharide transport system
M00260	0.553919	0.773655	-	-	DNA polymerase III complex, bacteria
M00729	0.553919	0.773655	-	-	Fluoroquinolone resistance, gyrase-protecting protein Qnr
M00455	0.572535	0.781751	-	-	TorS-TorR (TMAO respiration) two-component regulatory system
M00518	0.573572	0.781751	-	-	GlnK-GlnL (glutamine utilization) two-component regulatory system
M00186	0.577829	0.781751	-	-	Tungstate transport system
M00144	0.580205	0.781751	-	-	NADH:quinone oxidoreductase, prokaryotes
M00116	0.580205	0.781751	-	-	Menaquinone biosynthesis, chorismate => menaquinone
M00023	0.580205	0.781751	-	-	Tryptophan biosynthesis, chorismate => tryptophan
M00549	0.580205	0.781751	-	-	Nucleotide sugar biosynthesis, glucose => UDP-glucose
M00274	0.580205	0.781751	-	-	PTS system, mannitol-specific II component
M00003	0.580531	0.781751	-	-	Gluconeogenesis, oxaloacetate => fructose-6P
M00198	0.593564	0.78986	-	-	Putative sn-glycerol-phosphate transport system
M00206	0.593564	0.78986	-	-	Cellobiose transport system
M00153	0.593564	0.78986	-	-	Cytochrome d ubiquinol oxidase
M00503	0.598504	0.792227	-	-	PgtB-PgtA (phosphoglycerate transport) two-component regulatory system
M00743	0.607037	0.792227	-	-	Aminoglycoside resistance, protease HtpX
M00308	0.607062	0.792227	-	-	Semi-phosphorylative Entner-Doudoroff pathway, gluconate => glycerate-3P
M00279	0.607062	0.792227	-	-	PTS system, galactitol-specific II component
M00196	0.607062	0.792227	-	-	Raffinose/stachyose/melibiose transport system
M00522	0.615728	0.800177	-	-	SalK-SalR two-component regulatory system
M00822	0.620695	0.800177	-	-	Multidrug resistance, efflux pump MexMN-OprM
M00606	0.620695	0.800177	-	-	N,N'-Diacetylchitobiose transport system
M00224	0.626508	0.800177	-	-	Fluoroquinolone transport system
M00088	0.634135	0.800177	-	-	Ketone body biosynthesis, acetyl-CoA => acetoacetate/3-hydroxybutyrate/acetone
M00251	0.63446	0.800177	-	-	Teichoic acid transport system
M00605	0.63446	0.800177	-	-	Glucose/mannose transport system
M00200	0.63446	0.800177	-	-	Putative sorbitol/mannitol transport system
M00009	0.63446	0.800177	-	-	Citrate cycle (TCA cycle, Krebs cycle)
M00029	0.648352	0.808232	-	-	Urea cycle
M00060	0.648352	0.808232	-	-	Lipopolysaccharide biosynthesis, KDO2-lipid A
M00033	0.658626	0.808232	-	-	Ectoine biosynthesis, aspartate => ectoine
M00764	0.662368	0.808232	-	-	PTS system, fructoselysine/glucoselysine-specific II component
M00432	0.662368	0.808232	-	-	Leucine biosynthesis, 2-oxoisovalerate => 2-oxoisocaproate
M00361	0.662368	0.808232	-	-	Nucleotide sugar biosynthesis, eukaryotes
M00026	0.662368	0.808232	-	-	Histidine biosynthesis, PRPP => histidine
M00061	0.662368	0.808232	-	-	D-Glucuronate degradation, D-glucuronate => pyruvate + D-glyceraldehyde 3P
M00197	0.662368	0.808232	-	-	Putative fructooligosaccharide transport system
M00570	0.676503	0.819563	-	-	Isoleucine biosynthesis, threonine => 2-oxobutanoate => isoleucine
M00019	0.676503	0.819563	-	-	Valine/isoleucine biosynthesis, pyruvate => valine / 2-oxobutanoate => isoleucine
M00550	0.690753	0.833838	-	-	Ascorbate degradation, ascorbate => D-xylulose-5P
M00565	0.694785	0.83572	-	-	Trehalose biosynthesis, D-glucose 1P => trehalose
M00448	0.705094	0.845113	-	-	CssS-CssR (secretion stress response) two-component regulatory system
M00179	0.71958	0.856401	-	-	Ribosome, archaea
M00348	0.71958	0.856401	-	-	Glutathione transport system
M00762	0.727798	0.863143	-	-	Copper-processing system
M00335	0.734147	0.863816	-	-	Sec (secretion) system
M00602	0.748811	0.863816	-	-	Arabinosaccharide transport system
M00247	0.748811	0.863816	-	-	Putative ABC transport system
M00670	0.748811	0.863816	-	-	Mce transport system
M00216	0.748811	0.863816	-	-	Multiple sugar transport system
M00063	0.748811	0.863816	-	-	CMP-KDO biosynthesis
M00669	0.748811	0.863816	-	-	gamma-Hexachlorocyclohexane transport system
M00240	0.748811	0.863816	-	-	Iron complex transport system
M00440	0.763566	0.877842	-	-	Nickel transport system
M00345	0.770346	0.882634	-	-	Formaldehyde assimilation, ribulose monophosphate pathway
M00242	0.778408	0.888755	-	-	Zinc transport system
M00332	0.780947	0.888755	-	-	Type III secretion system
M00330	0.792063	0.896809	-	-	Adhesin protein transport system
M00359	0.793331	0.896809	-	-	Aminoacyl-tRNA biosynthesis, eukaryotes
M00123	0.80833	0.898735	-	-	Biotin biosynthesis, pimeloyl-ACP/CoA => biotin
M00325	0.80833	0.898735	-	-	alpha-Hemolysin/cyclolysin transport system
M00535	0.80833	0.898735	-	-	Isoleucine biosynthesis, pyruvate => 2-oxobutanoate
M00211	0.80833	0.898735	-	-	Putative ABC transport system
M00140	0.80833	0.898735	-	-	C1-unit interconversion, prokaryotes
M00278	0.814966	0.903143	-	-	PTS system, sorbose-specific II component
M00360	0.823399	0.906544	-	-	Aminoacyl-tRNA biosynthesis, prokaryotes
M00320	0.823399	0.906544	-	-	Lipopolysaccharide export system
M00646	0.837751	0.917232	-	-	Multidrug resistance, efflux pump AcrAD-TolC
M00491	0.838535	0.917232	-	-	arabinogalactan oligomer/maltooligosaccharide transport system
M00217	0.85332	0.921919	-	-	D-Allose transport system
M00593	0.853727	0.921919	-	-	Inositol transport system
M00210	0.85373	0.921919	-	-	Phospholipid transport system
M00573	0.85373	0.921919	-	-	Biotin biosynthesis, BioI pathway, long-chain-acyl-ACP => pimeloyl-ACP => biotin
M00575	0.867433	0.925343	-	-	Pertussis pathogenicity signature 2, T1SS
M00232	0.868977	0.925343	-	-	General L-amino acid transport system
M00821	0.868979	0.925343	-	-	Multidrug resistance, efflux pump TriABC-TolC
M00178	0.868979	0.925343	-	-	Ribosome, bacteria
M00323	0.879479	0.925343	-	-	Urea transport system
M00215	0.884278	0.925343	-	-	D-Xylose transport system
M00326	0.884278	0.925343	-	-	RTX toxin transport system
M00185	0.884278	0.925343	-	-	Sulfate transport system
M00720	0.884278	0.925343	-	-	Multidrug resistance, efflux pump VexEF-TolC
M00571	0.884278	0.925343	-	-	AlgE-type Mannuronan C-5-Epimerase transport system
M00188	0.899619	0.932734	-	-	NitT/TauT family transport system
M00002	0.899619	0.932734	-	-	Glycolysis, core module involving three-carbon compounds
M00582	0.899619	0.932734	-	-	Energy-coupling factor transport system
M00499	0.913793	0.942895	-	-	HydH-HydG (metal tolerance) two-component regulatory system
M00377	0.914999	0.942895	-	-	Reductive acetyl-CoA pathway (Wood-Ljungdahl pathway)
M00577	0.93041	0.955862	-	-	Biotin biosynthesis, BioW pathway, pimelate => pimeloyl-CoA => biotin
M00504	0.941789	0.96462	-	-	DctB-DctD (C4-dicarboxylate transport) two-component regulatory system
M00046	0.945847	0.965154	-	-	Pyrimidine degradation, uracil => beta-alanine, thymine => 3-aminoisobutanoate
M00082	0.948021	0.965154	-	-	Fatty acid biosynthesis, initiation
M00267	0.961305	0.972817	-	-	PTS system, N-acetylglucosamine-specific II component
M00656	0.961305	0.972817	-	-	VanS-VanR (VanB type vancomycin resistance) two-component regulatory system
M00034	0.976777	0.985524	-	-	Methionine salvage pathway
M00514	0.991213	0.992258	-	-	TtrS-TtrR (tetrathionate respiration) two-component regulatory system
M00339	0.992258	0.992258	-	-	RaxAB-RaxC type I secretion system
M00581	0.992258	0.992258	-	-	Biotin transport system
c. KEGG modules annotated by HUMAnN2 pipeline
Modules	p_valKW	FDR	LDA_score	enrichment	Definitions
M00191	0.000115968	0.0202065	2.53359	Yes	Thiamine transport system
M00259	0.000160287	0.0202065	2.52012	Yes	Heme transport system
M00317	0.000252829	0.0202065	2.45645	Yes	Manganese/iron transport system
M00739	0.000342616	0.0202065	2.61525	Yes	Cationic peptide transport system
M00453	0.000355381	0.0202065	2.51476	Yes	QseC-QseB (quorum sensing) two-component regulatory system
M00472	0.000422436	0.0202065	2.58754	Yes	NarQ-NarP (nitrate respiration) two-component regulatory system
M00229	0.000570546	0.0233924	2.50049	Yes	Arginine transport system
M00459	0.00122952	0.0393123	2.30658	Yes	VicK-VicR (cell wall metabolism) two-component regulatory system
M00193	0.00123279	0.0393123	2.55295	Yes	Putative spermidine/putrescine transport system
M00307	0.00141111	0.0404987	2.10753	Yes	Pyruvate oxidation, pyruvate => acetyl-CoA
M00456	0.00161144	0.0405714	2.38031	Yes	ArcB-ArcA (anoxic redox control) two-component regulatory system
M00209	0.00172353	0.0405714	2.79814	Yes	Osmoprotectant transport system
M00324	0.00183773	0.0405714	2.55479	Yes	Dipeptide transport system
M00447	0.00249524	0.0456853	2.54894	Yes	CpxA-CpxR (envelope stress response) two-component regulatory system
M00728	0.00249524	0.0456853	2.54894	Yes	Cationic antimicrobial peptide (CAMP) resistance, envelope protein folding and degrading factors DegP and DsbA
M00150	0.00254691	0.0456853	2.59512	Yes	Fumarate reductase, prokaryotes
M00580	0.00283881	0.0460486	2.79726	Yes	Pentose phosphate pathway, archaea, fructose 6P => ribose 5P
M00095	0.00288806	0.0460486	2.58345	Yes	C5 isoprenoid biosynthesis, mevalonate pathway
M00754	0.00329255	0.0472481	2.35998	Yes	Nisin resistance, phage shock protein homolog LiaH
M00481	0.00329255	0.0472481	2.36451	Yes	LiaS-LiaR (cell wall stress response) two-component regulatory system
M00635	0.00391877	0.0531003	2.21501	Yes	Tetracycline resistance, TetAB(46) transporter
M00495	0.0040704	0.0531003	2.88374	Yes	AgrC-AgrA (exoprotein synthesis) two-component regulatory system
M00064	0.00639879	0.0798458	2.74614	Yes	ADP-L-glycero-D-manno-heptose biosynthesis
M00265	0.0095762	0.112916	-	-	PTS system, glucose-specific II component
M00096	0.0101299	0.112916	-	-	C5 isoprenoid biosynthesis, non-mevalonate pathway
M00281	0.0102294	0.112916	-	-	PTS system, lactose-specific II component
M00442	0.0106652	0.113367	-	-	Putative hydroxymethylpyrimidine transport system
M00344	0.0113166	0.115995	-	-	Formaldehyde assimilation, xylulose monophosphate pathway
M00318	0.0133171	0.131793	-	-	Iron/zinc/manganese/copper transport system
M00115	0.0165433	0.158264	-	-	NAD biosynthesis, aspartate => NAD
M00521	0.0192464	0.167205	-	-	CiaH-CiaR two-component regulatory system
M00239	0.0193622	0.167205	-	-	Peptides/nickel transport system
M00596	0.0198686	0.167205	-	-	Dissimilatory sulfate reduction, sulfate => H2S
M00238	0.0203909	0.167205	-	-	D-Methionine transport system
M00119	0.0203909	0.167205	-	-	Pantothenate biosynthesis, valine/L-aspartate => pantothenate
M00270	0.0237681	0.185569	-	-	PTS system, trehalose-specific II component
M00365	0.024987	0.185569	-	-	C10-C20 isoprenoid biosynthesis, archaea
M00190	0.0249969	0.185569	-	-	Iron(III) transport system
M00319	0.0252167	0.185569	-	-	Manganese/zinc/iron transport system
M00706	0.0290078	0.208131	-	-	Multidrug resistance, EfrAB transporter
M00122	0.0304778	0.213344	-	-	Cobalamin biosynthesis, cobinamide => cobalamin
M00468	0.0351649	0.240294	-	-	SaeS-SaeR (staphylococcal virulence regulation) two-component regulatory system
M00374	0.0425588	0.284055	-	-	Dicarboxylate-hydroxybutyrate cycle
M00345	0.0446569	0.291285	-	-	Formaldehyde assimilation, ribulose monophosphate pathway
M00080	0.0480236	0.304881	-	-	Lipopolysaccharide biosynthesis, inner core => outer core => O-antigen
M00360	0.0488659	0.304881	-	-	Aminoacyl-tRNA biosynthesis, prokaryotes
M00646	0.0504749	0.308219	-	-	Multidrug resistance, efflux pump AcrAD-TolC
M00793	0.0534896	0.319823	-	-	dTDP-L-rhamnose biosynthesis
M00743	0.0577963	0.322528	-	-	Aminoglycoside resistance, protease HtpX
M00234	0.0584731	0.322528	-	-	Cystine transport system
M00767	0.0611821	0.322528	-	-	Multidrug resistance, efflux pump OqxAB
M00709	0.0621873	0.322528	-	-	Macrolide resistance, MacAB-TolC transporter
M00166	0.0633305	0.322528	-	-	Reductive pentose phosphate cycle, ribulose-5P => glyceraldehyde-3P
M00727	0.063791	0.322528	-	-	Cationic antimicrobial peptide (CAMP) resistance, N-acetylmuramoyl-L-alanine amidase AmiA and AmiC
M00254	0.0638364	0.322528	-	-	ABC-2 type transport system
M00008	0.0649751	0.322528	-	-	Entner-Doudoroff pathway, glucose-6P => glyceraldehyde-3P + pyruvate
M00333	0.0666667	0.322528	-	-	Type IV secretion system
M00093	0.0666667	0.322528	-	-	Phosphatidylethanolamine (PE) biosynthesis, PA => PS => PE
M00530	0.067287	0.322528	-	-	Dissimilatory nitrate reduction, nitrate => ammonia
M00479	0.0674275	0.322528	-	-	DesK-DesR (membrane lipid fluidity regulation) two-component regulatory system
M00342	0.0756081	0.345235	-	-	Bacterial proteasome
M00051	0.0757832	0.345235	-	-	Uridine monophosphate biosynthesis, glutamine (+ PRPP) => UMP
M00017	0.0757832	0.345235	-	-	Methionine biosynthesis, apartate => homoserine => methionine
M00761	0.0773327	0.346789	-	-	Undecaprenylphosphate alpha-L-Ara4N biosynthesis, UDP-GlcA => undecaprenyl phosphate alpha-L-Ara4N
M00188	0.0790392	0.348988	-	-	NitT/TauT family transport system
M00357	0.0852493	0.35724	-	-	Methanogenesis, acetate => methane
M00219	0.0854681	0.35724	-	-	AI-2 transport system
M00585	0.0858709	0.35724	-	-	L-Cystine transport system
M00244	0.085887	0.35724	-	-	Putative zinc/manganese transport system
M00125	0.0932178	0.382193	-	-	Riboflavin biosynthesis, GTP => riboflavin/FMN/FAD
M00461	0.0977682	0.386633	-	-	MtrB-MtrA (osmotic stress response) two-component regulatory system
M00492	0.0983383	0.386633	-	-	LytS-LytR two-component regulatory system
M00225	0.0989131	0.386633	-	-	Lysine/arginine/ornithine transport system
M00593	0.10071	0.386633	-	-	Inositol transport system
M00144	0.101036	0.386633	-	-	NADH:quinone oxidoreductase, prokaryotes
M00120	0.102971	0.386851	-	-	Coenzyme A biosynthesis, pantothenate => CoA
M00471	0.103851	0.386851	-	-	NarX-NarL (nitrate respiration) two-component regulatory system
M00121	0.105137	0.386851	-	-	Heme biosynthesis, glutamate => protoheme/siroheme
M00266	0.113734	0.412302	-	-	PTS system, maltose/glucose-specific II component
M00432	0.118235	0.412302	-	-	Leucine biosynthesis, 2-oxoisovalerate => 2-oxoisocaproate
M00283	0.118235	0.412302	-	-	PTS system, ascorbate-specific II component
M00445	0.120863	0.412302	-	-	EnvZ-OmpR (osmotic stress response) two-component regulatory system
M00497	0.121314	0.412302	-	-	GlnL-GlnG (nitrogen regulation) two-component regulatory system
M00711	0.122304	0.412302	-	-	Multidrug resistance, efflux pump MdtIJ
M00701	0.123213	0.412302	-	-	Multidrug resistance, efflux pump EmrAB
M00204	0.123999	0.412302	-	-	Trehalose/maltose transport system
M00473	0.124983	0.412302	-	-	UhpB-UhpA (hexose phosphates uptake) two-component regulatory system
M00020	0.127656	0.416333	-	-	Serine biosynthesis, glycerate-3P => serine
M00124	0.13258	0.422784	-	-	Pyridoxal biosynthesis, erythrose-4P => pyridoxal-5P
M00275	0.13258	0.422784	-	-	PTS system, cellobiose-specific II component
M00764	0.142862	0.445689	-	-	PTS system, fructoselysine/glucoselysine-specific II component
M00287	0.142869	0.445689	-	-	PTS system, galactosamine-specific II component
M00555	0.145707	0.447834	-	-	Betaine biosynthesis, choline => betaine
M00237	0.148238	0.447834	-	-	Branched-chain amino acid transport system
M00303	0.148238	0.447834	-	-	PTS system, N-acetylmuramic acid-specific II component
M00226	0.151192	0.450295	-	-	Histidine transport system
M00198	0.153759	0.450295	-	-	Putative sn-glycerol-phosphate transport system
M00222	0.153759	0.450295	-	-	Phosphate transport system
M00213	0.157864	0.45305	-	-	L-Arabinose transport system
M00233	0.159293	0.45305	-	-	Glutamate transport system
M00169	0.159436	0.45305	-	-	CAM (Crassulacean acid metabolism), light
M00747	0.16527	0.465023	-	-	Bacitracin transport system
M00136	0.169854	0.473283	-	-	GABA biosynthesis, prokaryotes, putrescine => GABA
M00205	0.18048	0.498056	-	-	N-Acetylglucosamine transport system
M00194	0.184794	0.503793	-	-	Maltose/maltodextrin transport system
M00269	0.190216	0.503793	-	-	PTS system, sucrose-specific II component
M00299	0.190216	0.503793	-	-	Spermidine/putrescine transport system
M00246	0.190216	0.503793	-	-	Nickel transport system
M00227	0.191336	0.503793	-	-	Glutamine transport system
M00258	0.196866	0.513641	-	-	Putative ABC transport system
M00477	0.199211	0.515077	-	-	EvgS-EvgA (acid and drug tolerance) two-component regulatory system
M00230	0.20198	0.515918	-	-	Glutamate/aspartate transport system
M00631	0.203684	0.515918	-	-	D-Galacturonate degradation (bacteria), D-galacturonate => pyruvate + D-glyceraldehyde 3P
M00417	0.204929	0.515918	-	-	Cytochrome o ubiquinol oxidase
M00506	0.217832	0.543633	-	-	CheA-CheYBV (chemotaxis) two-component regulatory system
M00545	0.220774	0.546225	-	-	Trans-cinnamate degradation, trans-cinnamate => acetyl-CoA
M00708	0.22344	0.547657	-	-	Multidrug resistance, PatAB transporter
M00117	0.228169	0.547657	-	-	Ubiquinone biosynthesis, prokaryotes, chorismate => ubiquinone
M00221	0.232674	0.547657	-	-	Putative simple sugar transport system
M00740	0.233401	0.547657	-	-	Methylaspartate cycle
M00723	0.24095	0.547657	-	-	Cationic antimicrobial peptide (CAMP) resistance, ethanolaminephosphotransferase EptB
M00449	0.242395	0.547657	-	-	CreC-CreB (phosphate regulation) two-component regulatory system
M00648	0.243656	0.547657	-	-	Multidrug resistance, efflux pump MdtABC
M00651	0.244258	0.547657	-	-	Vancomycin resistance, D-Ala-D-Lac type
M00134	0.245897	0.547657	-	-	Polyamine biosynthesis, arginine => ornithine => putrescine
M00348	0.247247	0.547657	-	-	Glutathione transport system
M00045	0.248219	0.547657	-	-	Histidine degradation, histidine => N-formiminoglutamate => glutamate
M00022	0.248219	0.547657	-	-	Shikimate pathway, phosphoenolpyruvate + erythrose-4P => chorismate
M00724	0.252337	0.547657	-	-	Cationic antimicrobial peptide (CAMP) resistance, palmitoyl transferase PagP
M00446	0.255008	0.547657	-	-	RstB-RstA two-component regulatory system
M00454	0.256258	0.547657	-	-	KdpD-KdpE (potassium transport) two-component regulatory system
M00255	0.256258	0.547657	-	-	Lipoprotein-releasing system
M00223	0.256258	0.547657	-	-	Phosphonate transport system
M00245	0.264476	0.547657	-	-	Cobalt/nickel transport system
M00088	0.268478	0.547657	-	-	Ketone body biosynthesis, acetyl-CoA => acetoacetate/3-hydroxybutyrate/acetone
M00652	0.26914	0.547657	-	-	Vancomycin resistance, D-Ala-D-Ser type
M00475	0.269326	0.547657	-	-	BarA-UvrY (central carbon metabolism) two-component regulatory system
M00282	0.272841	0.547657	-	-	PTS system, D-glucosamine-specific II component
M00276	0.272874	0.547657	-	-	PTS system, mannose-specific II component
M00359	0.272874	0.547657	-	-	Aminoacyl-tRNA biosynthesis, eukaryotes
M00019	0.272874	0.547657	-	-	Valine/isoleucine biosynthesis, pyruvate => valine / 2-oxobutanoate => isoleucine
M00570	0.272874	0.547657	-	-	Isoleucine biosynthesis, threonine => 2-oxobutanoate => isoleucine
M00277	0.272874	0.547657	-	-	PTS system, N-acetylgalactosamine-specific II component
M00241	0.275802	0.549504	-	-	Vitamin B12 transport system
M00006	0.281453	0.549504	-	-	Pentose phosphate pathway, oxidative phase, glucose 6P => ribulose 5P
M00189	0.281453	0.549504	-	-	Molybdate transport system
M00208	0.281453	0.549504	-	-	Glycine betaine/proline transport system
M00242	0.290213	0.562778	-	-	Zinc transport system
M00712	0.292351	0.563119	-	-	Multidrug resistance, efflux pump YkkCD
M00444	0.296408	0.563371	-	-	PhoQ-PhoP (magnesium transport) two-component regulatory system
M00744	0.296408	0.563371	-	-	Cationic antimicrobial peptide (CAMP) resistance, protease PgtE
M00002	0.299155	0.564851	-	-	Glycolysis, core module involving three-carbon compounds
M00722	0.301657	0.565854	-	-	Cationic antimicrobial peptide (CAMP) resistance, ethanolaminephosphotransferase EptA
M00216	0.308245	0.574457	-	-	Multiple sugar transport system
M00306	0.317419	0.580552	-	-	PTS system, fructose-specific II-like component
M00272	0.317584	0.580552	-	-	PTS system, beta-glucoside (arbutin/salicin/cellobiose)-specific II component
M00527	0.317584	0.580552	-	-	Lysine biosynthesis, DAP aminotransferase pathway, aspartate => lysine
M00267	0.327072	0.594112	-	-	PTS system, N-acetylglucosamine-specific II component
M00300	0.332955	0.600994	-	-	Putrescine transport system
M00140	0.336742	0.604032	-	-	C1-unit interconversion, prokaryotes
M00721	0.352858	0.605635	-	-	Cationic antimicrobial peptide (CAMP) resistance, arnBCADTEF operon
M00455	0.354303	0.605635	-	-	TorS-TorR (TMAO respiration) two-component regulatory system
M00326	0.356628	0.605635	-	-	RTX toxin transport system
M00228	0.356628	0.605635	-	-	Putative glutamine transport system
M00439	0.356628	0.605635	-	-	Oligopeptide transport system
M00821	0.356628	0.605635	-	-	Multidrug resistance, efflux pump TriABC-TolC
M00720	0.356628	0.605635	-	-	Multidrug resistance, efflux pump VexEF-TolC
M00571	0.356628	0.605635	-	-	AlgE-type Mannuronan C-5-Epimerase transport system
M00325	0.356628	0.605635	-	-	alpha-Hemolysin/cyclolysin transport system
M00488	0.360078	0.607896	-	-	DcuS-DcuR (C4-dicarboxylate metabolism) two-component regulatory system
M00033	0.365614	0.612116	-	-	Ectoine biosynthesis, aspartate => ectoine
M00339	0.366843	0.612116	-	-	RaxAB-RaxC type I secretion system
M00175	0.377206	0.618671	-	-	Nitrogen fixation, nitrogen => ammonia
M00620	0.377238	0.618671	-	-	Incomplete reductive citrate cycle, acetyl-CoA => oxoglutarate
M00256	0.377238	0.618671	-	-	Cell division transport system
M00670	0.387813	0.628828	-	-	Mce transport system
M00669	0.387813	0.628828	-	-	gamma-Hexachlorocyclohexane transport system
M00361	0.397598	0.641071	-	-	Nucleotide sugar biosynthesis, eukaryotes
M00502	0.417431	0.669289	-	-	GlrK-GlrR (amino sugar metabolism) two-component regulatory system
M00172	0.426888	0.677334	-	-	C4-dicarboxylic acid cycle, NADP - malic enzyme type
M00046	0.431881	0.677334	-	-	Pyrimidine degradation, uracil => beta-alanine, thymine => 3-aminoisobutanoate
M00271	0.431889	0.677334	-	-	PTS system, beta-glucoside-specific II component
M00159	0.431889	0.677334	-	-	V/A-type ATPase, prokaryotes
M00320	0.443345	0.684086	-	-	Lipopolysaccharide export system
M00236	0.443345	0.684086	-	-	Putative polar amino acid transport system
M00157	0.443345	0.684086	-	-	F-type ATPase, prokaryotes and chloroplasts
M00050	0.454973	0.687248	-	-	Guanine ribonucleotide biosynthesis IMP => GDP,GTP
M00657	0.454973	0.687248	-	-	VanS-VanR (VanE type vancomycin resistance) two-component regulatory system
M00240	0.454973	0.687248	-	-	Iron complex transport system
M00525	0.454973	0.687248	-	-	Lysine biosynthesis, acetyl-DAP pathway, aspartate => lysine
M00746	0.462836	0.695465	-	-	Multidrug resistance, repression of porin OmpF
M00280	0.46677	0.697724	-	-	PTS system, glucitol/sorbitol-specific II component
M00697	0.469955	0.698844	-	-	Multidrug resistance, efflux pump MdtEF-TolC
M00526	0.478736	0.704394	-	-	Lysine biosynthesis, DAP dehydrogenase pathway, aspartate => lysine
M00331	0.478736	0.704394	-	-	Type II general secretion pathway
M00215	0.484519	0.704394	-	-	D-Xylose transport system
M00435	0.487462	0.704394	-	-	Taurine transport system
M00217	0.489719	0.704394	-	-	D-Allose transport system
M00220	0.490859	0.704394	-	-	Rhamnose transport system
M00603	0.490867	0.704394	-	-	Putative aldouronate transport system
M00183	0.503161	0.716935	-	-	RNA polymerase, bacteria
M00806	0.515616	0.716935	-	-	PTS system, maltose-specific II component
M00429	0.515616	0.716935	-	-	Competence-related DNA transformation transporter
M00212	0.515616	0.716935	-	-	Ribose transport system
M00214	0.515616	0.716935	-	-	Methyl-galactoside transport system
M00116	0.515616	0.716935	-	-	Menaquinone biosynthesis, chorismate => menaquinone
M00202	0.521832	0.716935	-	-	Oligogalacturonide transport system
M00199	0.528088	0.716935	-	-	L-Arabinose/lactose transport system
M00061	0.528201	0.716935	-	-	D-Glucuronate degradation, D-glucuronate => pyruvate + D-glyceraldehyde 3P
M00060	0.528229	0.716935	-	-	Lipopolysaccharide biosynthesis, KDO2-lipid A
M00149	0.528229	0.716935	-	-	Succinate dehydrogenase, prokaryotes
M00645	0.532908	0.716935	-	-	Multidrug resistance, efflux pump SmeABC
M00450	0.532908	0.716935	-	-	BaeS-BaeR (envelope stress response) two-component regulatory system
M00707	0.537076	0.716935	-	-	Multidrug resistance, MdlAB/SmdAB transporter
M00232	0.537076	0.716935	-	-	General L-amino acid transport system
M00250	0.540998	0.718826	-	-	Lipopolysaccharide transport system
M00491	0.553919	0.725912	-	-	arabinogalactan oligomer/maltooligosaccharide transport system
M00298	0.553919	0.725912	-	-	Multidrug/hemolysin transport system
M00026	0.553919	0.725912	-	-	Histidine biosynthesis, PRPP => histidine
M00273	0.566989	0.739663	-	-	PTS system, fructose-specific II component
M00451	0.580158	0.750085	-	-	BasS-BasR (antimicrobial peptide resistance) two-component regulatory system
M00011	0.580205	0.750085	-	-	Citrate cycle, second carbon oxidation, 2-oxoglutarate => oxaloacetate
M00500	0.590048	0.759389	-	-	AtoS-AtoC (cPHB biosynthesis) two-component regulatory system
M00346	0.619485	0.793716	-	-	Formaldehyde assimilation, serine pathway
M00179	0.63446	0.802158	-	-	Ribosome, archaea
M00063	0.63446	0.802158	-	-	CMP-KDO biosynthesis
M00173	0.63446	0.802158	-	-	Reductive citrate cycle (Arnon-Buchanan cycle)
M00268	0.648352	0.816127	-	-	PTS system, alpha-glucoside-specific II component
M00207	0.662368	0.830129	-	-	Putative multiple sugar transport system
M00486	0.669337	0.835216	-	-	CitA-CitB (citrate fermentation) two-component regulatory system
M00029	0.676064	0.839958	-	-	Urea cycle
M00627	0.683609	0.845671	-	-	beta-Lactam resistance, Bla system
M00696	0.701114	0.853386	-	-	Multidrug resistance, efflux pump AcrEF-TolC
M00552	0.705114	0.853386	-	-	D-galactonate degradation, De Ley-Doudoroff pathway, D-galactonate => glycerate-3P
M00210	0.705114	0.853386	-	-	Phospholipid transport system
M00443	0.716406	0.853386	-	-	SenX3-RegX3 (phosphate starvation response) two-component regulatory system
M00253	0.719028	0.853386	-	-	Sodium transport system
M00274	0.71958	0.853386	-	-	PTS system, mannitol-specific II component
M00279	0.71958	0.853386	-	-	PTS system, galactitol-specific II component
M00394	0.71958	0.853386	-	-	RNA degradosome
M00519	0.71958	0.853386	-	-	YesM-YesN two-component regulatory system
M00005	0.71958	0.853386	-	-	PRPP biosynthesis, ribose 5P => PRPP
M00003	0.722861	0.853749	-	-	Gluconeogenesis, oxaloacetate => fructose-6P
M00440	0.763566	0.898129	-	-	Nickel transport system
M00335	0.778408	0.904466	-	-	Sec (secretion) system
M00211	0.778408	0.904466	-	-	Putative ABC transport system
M00742	0.778408	0.904466	-	-	Aminoglycoside resistance, protease FtsH
M00176	0.793317	0.906213	-	-	Assimilatory sulfate reduction, sulfate => H2S
M00178	0.793331	0.906213	-	-	Ribosome, bacteria
M00436	0.793331	0.906213	-	-	Sulfonate transport system
M00251	0.800788	0.906213	-	-	Teichoic acid transport system
M00009	0.80833	0.906213	-	-	Citrate cycle (TCA cycle, Krebs cycle)
M00549	0.80833	0.906213	-	-	Nucleotide sugar biosynthesis, glucose => UDP-glucose
M00206	0.80833	0.906213	-	-	Cellobiose transport system
M00362	0.80833	0.906213	-	-	Nucleotide sugar biosynthesis, prokaryotes
M00582	0.80833	0.906213	-	-	Energy-coupling factor transport system
M00573	0.823399	0.915952	-	-	Biotin biosynthesis, BioI pathway, long-chain-acyl-ACP => pimeloyl-ACP => biotin
M00196	0.823399	0.915952	-	-	Raffinose/stachyose/melibiose transport system
M00499	0.828133	0.917661	-	-	HydH-HydG (metal tolerance) two-component regulatory system
M00192	0.836989	0.917679	-	-	Putative thiamine transport system
M00034	0.838535	0.917679	-	-	Methionine salvage pathway
M00554	0.838535	0.917679	-	-	Nucleotide sugar biosynthesis, galactose => UDP-galactose
M00452	0.850828	0.917679	-	-	CusS-CusR (copper tolerance) two-component regulatory system
M00572	0.853727	0.917679	-	-	Pimeloyl-ACP biosynthesis, BioC-BioH pathway, malonyl-ACP => pimeloyl-ACP
M00016	0.85373	0.917679	-	-	Lysine biosynthesis, succinyl-DAP pathway, aspartate => lysine
M00123	0.85373	0.917679	-	-	Biotin biosynthesis, pimeloyl-ACP/CoA => biotin
M00602	0.85373	0.917679	-	-	Arabinosaccharide transport system
M00133	0.868979	0.923693	-	-	Polyamine biosynthesis, arginine => agmatine => putrescine => spermidine
M00550	0.868979	0.923693	-	-	Ascorbate degradation, ascorbate => D-xylulose-5P
M00247	0.868979	0.923693	-	-	Putative ABC transport system
M00023	0.884278	0.929625	-	-	Tryptophan biosynthesis, chorismate => tryptophan
M00260	0.884278	0.929625	-	-	DNA polymerase III complex, bacteria
M00632	0.884278	0.929625	-	-	Galactose degradation, Leloir pathway, galactose => alpha-D-glucose-1P
M00589	0.93041	0.969493	-	-	Putative lysine transport system
M00535	0.93041	0.969493	-	-	Isoleucine biosynthesis, pyruvate => 2-oxobutanoate
M00200	0.945847	0.969493	-	-	Putative sorbitol/mannitol transport system
M00308	0.945847	0.969493	-	-	Semi-phosphorylative Entner-Doudoroff pathway, gluconate => glycerate-3P
M00197	0.945847	0.969493	-	-	Putative fructooligosaccharide transport system
M00377	0.945847	0.969493	-	-	Reductive acetyl-CoA pathway (Wood-Ljungdahl pathway)
M00605	0.945847	0.969493	-	-	Glucose/mannose transport system
M00349	0.961195	0.974892	-	-	Microcin C transport system
M00606	0.961305	0.974892	-	-	N,N'-Diacetylchitobiose transport system
M00581	0.961305	0.974892	-	-	Biotin transport system
M00577	0.976777	0.980192	-	-	Biotin biosynthesis, BioW pathway, pimelate => pimeloyl-CoA => biotin
M00153	0.976777	0.980192	-	-	Cytochrome d ubiquinol oxidase
M00185	0.976777	0.980192	-	-	Sulfate transport system
M00729	0.992258	0.992258	-	-	Fluoroquinolone resistance, gyrase-protecting protein Qnr
d. Metabolome profiles
Metabolites	p_valKW	FDR	LDA_score	enrichment
C00134_Putrescine_1_4_Butanediamine_	0.000561396	0.191997	-	-
C05332_Phenethylamine	0.00269558	0.460944	-	-
C01672_Cadaverine	0.00507591	0.505545	-	-
C02567_N1_Acetylspermine	0.0069155	0.505545	-	-
C00986_1_3_Diaminopropane	0.00945511	0.505545	-	-
C02714_N_Acetylputrescine	0.0104857	0.505545	-	-
C00327_Citrulline	0.0117714	0.505545	-	-
C00355_DOPA	0.0118256	0.505545	-	-
C02713_N_Acetylmuramate	0.0168697	0.586263	-	-
C00021_SAH	0.0171422	0.586263	-	-
f__Cysteine_glutathionedisulphide_Divalent	0.0202327	0.629052	-	-
f__gamma_Glu_2AB	0.0233416	0.665235	-	-
C00378_Thiamine	0.026358	0.693417	-	-
C04677_AICAR	0.0408177	0.937184	-	-
C00493_Shikimate	0.0479457	0.937184	-	-
C00398_Tryptamine	0.0513246	0.937184	-	-
C02693_Indole_3_acetamide	0.0574542	0.937184	-	-
C00881_2_Deoxycytidine	0.0596428	0.937184	-	-
C10172_Prolinebetaine	0.0670968	0.937184	-	-
C00334_GABA	0.0670968	0.937184	-	-
C00120_Biotin	0.0682551	0.937184	-	-
C05382_S7P	0.0682551	0.937184	-	-
C00490_Itaconate	0.0704263	0.937184	-	-
C03557_2_Aminoethylphosphonate	0.0704263	0.937184	-	-
C05635_5_Hydroxyindoleacetate	0.0759986	0.937184	-	-
C00016_FAD	0.0877784	0.937184	-	-
C00387_Guanosine	0.0909272	0.937184	-	-
C01118_o_Succinylhomoserine	0.0910059	0.937184	-	-
C00077_Ornithine	0.0911431	0.937184	-	-
C03519_N_Acetylphenylalanine	0.0915815	0.937184	-	-
C00092_G6P	0.0945401	0.937184	-	-
C00299_Uridine	0.0969869	0.937184	-	-
C05341_beta_Ala_Lys	0.0980226	0.937184	-	-
C08277_Sebacate	0.102344	0.937184	-	-
C00954_Indole_3_acetate	0.103338	0.937184	-	-
C00147_Adenine	0.103635	0.937184	-	-
C01585_Hexanoate	0.103968	0.937184	-	-
C01601_Pelargonate	0.106331	0.937184	-	-
C00506_Cysteate	0.106872	0.937184	-	-
C04548_Synephrine	0.114511	0.937453	-	-
C17714_Heptanoate	0.114778	0.937453	-	-
C04137_Octopine	0.116637	0.937453	-	-
C00483_Tyramine	0.131319	0.937453	-	-
C00568_p_Aminobenzoate	0.143872	0.937453	-	-
C01015_Hydroxyproline	0.147998	0.937453	-	-
C00315_Spermidine	0.148006	0.937453	-	-
f__N1_N8_Diacetylspermidine	0.148006	0.937453	-	-
C01959_Taurocyamine	0.14815	0.937453	-	-
C11331_Leu_Leu_Tyr	0.14815	0.937453	-	-
C06231_Ectoine	0.14815	0.937453	-	-
C05824_CysteineS_sulfate	0.14815	0.937453	-	-
C03264_2_Hydroxy_4_methylpentanoate	0.14855	0.937453	-	-
C00296_Quinate	0.150176	0.937453	-	-
C00670_Glycerophosphorylcholine	0.150366	0.937453	-	-
C06104_Adipate	0.169532	0.937453	-	-
C01586_Hippurate	0.177534	0.937453	-	-
C00153_Nicotinamide	0.178397	0.937453	-	-
C02953_7_8_Dihydrobiopterin	0.179052	0.937453	-	-
C00051_Glutathione_red_	0.181346	0.937453	-	-
C01598_Melatonin	0.182056	0.937453	-	-
C00547_Noradrenaline	0.185293	0.937453	-	-
C00250_Pyridoxal	0.188799	0.937453	-	-
f__3_Indoxylsulfate	0.191035	0.937453	-	-
C00587_m_Hydroxybenzoate	0.191035	0.937453	-	-
C03793_N6_N6_N6_Trimethyllysine	0.191898	0.937453	-	-
C00047_Lys	0.191898	0.937453	-	-
C00438_Carbamoylaspartate	0.193669	0.937453	-	-
C01571_Decanoate	0.193673	0.937453	-	-
C01047_N_gamma_Ethylglutamine	0.201168	0.937453	-	-
C00255_Riboflavin	0.20156	0.937453	-	-
C02989_Methioninesulfoxide	0.206043	0.937453	-	-
C00383_Malonate	0.208713	0.937453	-	-
C00329_Glucosamine	0.209002	0.937453	-	-
C00366_Urate	0.20924	0.937453	-	-
C02376_5_Methylcytosine	0.209806	0.937453	-	-
C01005_O_Phosphoserine	0.209806	0.937453	-	-
C00006_NADP_	0.212209	0.937453	-	-
C00642_p_Hydroxyphenylacetate	0.217943	0.937453	-	-
C00588_Phosphorylcholine	0.220513	0.937453	-	-
C03758_Dopamine	0.228992	0.937453	-	-
C06057_3_Aminopropane_1_2_diol	0.234446	0.937453	-	-
C00576_Betainealdehyde	0.237141	0.937453	-	-
C02704_Methylsulfate	0.238219	0.937453	-	-
C00085_F6P	0.245154	0.937453	-	-
C06524_Nornicotine	0.245508	0.937453	-	-
C02273_Digalacturonate	0.246698	0.937453	-	-
f__Phe_Phe	0.246698	0.937453	-	-
C00818_Saccharate	0.246698	0.937453	-	-
C00199_Ru5P	0.246698	0.937453	-	-
C03722_2_3_Pyridinedicarboxylate	0.246698	0.937453	-	-
C03172_S_Methylmethionine	0.25335	0.941856	-	-
C02567_N1_Acetylspermine_div	0.256999	0.941856	-	-
C02614_Citramalate	0.260973	0.941856	-	-
C00079_Phe	0.261483	0.941856	-	-
C02678_Dodecanedioate	0.261627	0.941856	-	-
C11527_4_Hydroxymandelate	0.28057	0.945903	-	-
C00449_Saccharopine	0.304871	0.945903	-	-
f__2_Hydroxypentanoate	0.307942	0.945903	-	-
C00695_Cholate	0.316576	0.945903	-	-
C00093_Glycerophosphate	0.318238	0.945903	-	-
C03451_S_Lactoylglutathione	0.320338	0.945903	-	-
C02774_10_Hydroxydecanoate	0.320338	0.945903	-	-
C00301_ADP_ribose	0.320338	0.945903	-	-
C01670_N_alpha_Benzenolarginineethylester	0.320338	0.945903	-	-
C02640_Isoamylamine	0.320338	0.945903	-	-
C07044_Hydroxyurea	0.3227	0.945903	-	-
C01930_Lysinamide	0.324295	0.945903	-	-
C02630_2_Hydroxyglutarate	0.325352	0.945903	-	-
C00330_2_Deoxyguanosine	0.326205	0.945903	-	-
C11284_3_Indolebutyrate	0.329869	0.945903	-	-
C00931_Porphobilinogen	0.330522	0.945903	-	-
C01029_N8_Acetylspermidine	0.331381	0.945903	-	-
C05660_5_Methoxyindoleacetate	0.332199	0.945903	-	-
C00346_Ethanolaminephosphate	0.334159	0.945903	-	-
C00062_Arg	0.336534	0.945903	-	-
C00082_Tyr	0.336534	0.945903	-	-
f__2_Hydroxyisobutyrate	0.336587	0.945903	-	-
C00029_UDP_glucose	0.339667	0.945903	-	-
C00262_Hypoxanthine	0.341601	0.945903	-	-
C00630_IsobutyrylCoA	0.346578	0.945903	-	-
C03413_N1_N12_Diacetylspermine	0.346769	0.945903	-	-
C05123_Isethionate	0.351001	0.945903	-	-
C00628_2_5_Dihydroxybenzoate	0.356336	0.945903	-	-
C00065_Ser	0.357275	0.945903	-	-
C00581_Guanidinoacetate	0.360883	0.945903	-	-
C02226_Citraconate	0.362861	0.945903	-	-
C00519_Hypotaurine	0.365355	0.945903	-	-
C00020_AMP	0.366842	0.945903	-	-
C00294_Inosine	0.367758	0.945903	-	-
C00482_Sinapate	0.371968	0.945903	-	-
C00440_5_Methyltetrahydrofolate	0.372784	0.945903	-	-
C00178_Thymine	0.373028	0.945903	-	-
C00386_Carnosine	0.377298	0.945903	-	-
C03139_Guanidinosuccinate	0.378711	0.945903	-	-
C05127_1_Methylhistamine	0.382806	0.945903	-	-
C00103_G1P	0.385637	0.945903	-	-
C03678_4_Amino_3_hydroxybutyrate	0.385637	0.945903	-	-
C06103_6_Hydroxyhexanoate	0.385637	0.945903	-	-
C05984_2_Hydroxybutyrate	0.387212	0.945903	-	-
C11118_1_Methyl_2_pyrrolidinone	0.387212	0.945903	-	-
C01026_N_N_Dimethylglycine	0.393653	0.948814	-	-
C02656_Pimelate	0.39835	0.948814	-	-
C00140_N_Acetylglucosamine	0.401074	0.948814	-	-
C05198_5_Deoxyadenosine	0.403819	0.948814	-	-
C02835_Imidazole_4_acetate	0.406403	0.948814	-	-
C02721_N_Methylalanine	0.410584	0.948814	-	-
C02735_Phenylethanolamine	0.410598	0.948814	-	-
C00884_Homocarnosine	0.410598	0.948814	-	-
C01736_Purineriboside	0.427172	0.959449	-	-
C01020_6_Hydroxynicotinate	0.432739	0.959449	-	-
C01035_gamma_Guanidinobutyrate	0.434079	0.959449	-	-
C00152_Asn	0.435522	0.959449	-	-
C03626_ADMA	0.435925	0.959449	-	-
C08306_Hexylamine	0.44169	0.959449	-	-
C01996_Acetylcholine	0.446563	0.959449	-	-
C08262_3_Methylbutanoate	0.447938	0.959449	-	-
C00711_Malate	0.448016	0.959449	-	-
C00431_5_Aminovalerate	0.448025	0.959449	-	-
C16741_5_Hydroxylysine	0.448025	0.959449	-	-
C11003_2_4_Dimethylaniline	0.452072	0.959449	-	-
C00043_UDP_N_acetylglucosamine	0.452676	0.959449	-	-
C00417_cis_Aconitate	0.455047	0.959449	-	-
C00245_Taurine	0.472571	0.959449	-	-
C01008_Trimethylsulfonium	0.474653	0.959449	-	-
C01096_Sorbitol6_phosphate	0.481515	0.959449	-	-
C05568_beta_Imidazolelactate	0.481515	0.959449	-	-
C04294_4_Methyl_5_thiazoleethanol	0.48313	0.959449	-	-
C00300_Creatine	0.485168	0.959449	-	-
C05771_Isopropanolamine	0.485168	0.959449	-	-
C01081_Thiaminemonophosphate	0.487027	0.959449	-	-
C00571_Cyclohexylamine	0.491484	0.959449	-	-
C00803_Pentanoate	0.497746	0.959449	-	-
C00049_Asp	0.497909	0.959449	-	-
C02727_N_epsilon_Acetyllysine	0.497909	0.959449	-	-
C00805_o_Hydroxybenzoate	0.49911	0.959449	-	-
C02703_SerineO_sulfate	0.49911	0.959449	-	-
C00015_UDP	0.499115	0.959449	-	-
C02037_Gly_Gly	0.499362	0.959449	-	-
C00270_N_Acetylneuraminate	0.520638	0.991929	-	-
C05135_4__beta_Acetylaminoethyl_imidazole	0.523839	0.991929	-	-
C00074_PEP	0.528466	0.991929	-	-
C03752_Glucosaminate	0.540458	0.991929	-	-
C01606_Phthalate	0.54169	0.991929	-	-
C01762_Xanthosine	0.544137	0.991929	-	-
C00044_GTP	0.544137	0.991929	-	-
C00942_cGMP	0.544137	0.991929	-	-
C01234_1_Aminocyclopropane_1_carboxylate	0.547052	0.991929	-	-
C00624_N_Acetylglutamate	0.550575	0.991929	-	-
f__Ophthalmate	0.552003	0.991929	-	-
C00780_Serotonin	0.553	0.991929	-	-
C00127_Glutathione_ox_	0.560391	0.991929	-	-
C00979_O_Acetylserine	0.564206	0.991929	-	-
C02679_Dodecanoate	0.565973	0.991929	-	-
C03795_N6_Methyl_2_deoxyadenosine	0.572622	0.991929	-	-
C05582_Homovanillate	0.572805	0.991929	-	-
C03406_Argininosuccinate	0.576342	0.991929	-	-
C02997_N_Acetylhistidine	0.577938	0.991929	-	-
C00041_Ala	0.577945	0.991929	-	-
C00715_Pterin	0.57808	0.991929	-	-
C00253_Nicotinate	0.588393	0.991929	-	-
C00847_4_Pyridoxate	0.591454	0.991929	-	-
C00135_His	0.59185	0.991929	-	-
C00750_Spermine	0.603683	0.991929	-	-
C02242_7_Methylguanine	0.60577	0.991929	-	-
C00388_Histamine	0.605901	0.991929	-	-
C00123_Leu	0.605907	0.991929	-	-
C06369_2_Deoxyglucose6_phosphate	0.616672	0.991929	-	-
C00170_5_Methylthioadenosine	0.620105	0.991929	-	-
C00612_N1_Acetylspermidine	0.620112	0.991929	-	-
C00191_Glucuronate	0.620523	0.991929	-	-
C06423_Octanoate	0.625029	0.991929	-	-
f__N_Acetylvaline	0.629135	0.991929	-	-
C00385_Xanthine	0.629783	0.991929	-	-
C05122_Taurocholate	0.630789	0.991929	-	-
C05145_3_Aminoisobutyrate	0.63433	0.991929	-	-
C09815_Benzamide	0.635211	0.991929	-	-
C00314_Pyridoxine	0.644454	0.991929	-	-
C04483_DCA	0.648946	0.991929	-	-
C05629_3_Phenylpropionate	0.650141	0.991929	-	-
C01744_3__4_Hydroxyphenyl_propionate	0.650684	0.991929	-	-
C00003_NAD_	0.655224	0.991929	-	-
C08261_Azelate	0.663542	0.991929	-	-
C02256_Castanospermine	0.66482	0.991929	-	-
C08269_Betonicine	0.664885	0.991929	-	-
C00729_Tropine	0.664885	0.991929	-	-
C05598_Phenaceturate	0.681822	0.991929	-	-
f__2_Hydroxyoctanoate	0.682762	0.991929	-	-
C03761_3_Hydroxy_3_methylglutarate	0.683406	0.991929	-	-
C02115_Alpha_Methylserine	0.691961	0.991929	-	-
C00407_Ile	0.69319	0.991929	-	-
C00183_Val	0.69319	0.991929	-	-
C00042_Succinate	0.69319	0.991929	-	-
C02571_o_Acetylcarnitine	0.699772	0.991929	-	-
C00955_Indole_3_ethanol	0.702301	0.991929	-	-
C02341_trans_Aconitate	0.702301	0.991929	-	-
C04259_N_alpha_N_alpha_Dimethylhistidine	0.702729	0.991929	-	-
C01181_gamma_Butyrobetaine	0.708183	0.991929	-	-
C01152_3_Methylhistidine	0.708183	0.991929	-	-
C01921_Glycocholate	0.719069	0.991929	-	-
C02712_N_Acetylmethionine	0.720108	0.991929	-	-
C00163_Propionate	0.723113	0.991929	-	-
C00064_Gln	0.72329	0.991929	-	-
C00408_Pipecolate	0.72329	0.991929	-	-
C00105_UMP	0.736293	0.991929	-	-
C00719_Betaine	0.737927	0.991929	-	-
C00489_Glutarate	0.738457	0.991929	-	-
C00148_Pro	0.738505	0.991929	-	-
C05659_5_Methoxytryptamine	0.740912	0.991929	-	-
C00785_Urocanate	0.744087	0.991929	-	-
C00122_Fumarate	0.748733	0.991929	-	-
C02378_6_Aminohexanoate	0.748851	0.991929	-	-
C02155_Gly_Leu	0.753733	0.991929	-	-
C02627_2_Deoxystreptamine	0.753882	0.991929	-	-
C01987_2_Aminophenol	0.762853	0.991929	-	-
C00311_Isocitrate	0.768234	0.991929	-	-
C05607_3_Phenyllactate	0.770349	0.991929	-	-
C00647_Pyridoxamine5_phosphate	0.773524	0.991929	-	-
C00357_N_Acetylglucosamine6_phosphate	0.782472	0.991929	-	-
C04501_N_Acetylglucosamine1_phosphate	0.784267	0.991929	-	-
C09209_Harman	0.793704	0.991929	-	-
C03958_TRH	0.794896	0.991929	-	-
C00055_CMP	0.800209	0.991929	-	-
C00188_Thr	0.800342	0.991929	-	-
C00078_Trp	0.800342	0.991929	-	-
C00019_SAM_	0.800342	0.991929	-	-
C00956_alpha_Aminoadipate	0.800342	0.991929	-	-
C01551_Allantoin	0.807668	0.991929	-	-
C00423_trans_Cinnamate	0.81196	0.991929	-	-
C01004_Trigonelline	0.815254	0.991929	-	-
C00430_5_Aminolevulinate	0.815896	0.991929	-	-
C00631_2PG	0.82488	0.991929	-	-
C00437_N_Acetylornithine	0.831764	0.991929	-	-
C00214_Thymidine	0.832247	0.991929	-	-
C01425_Glu_Glu	0.834043	0.991929	-	-
f__Diazoxide	0.834435	0.991929	-	-
C00156_p_Hydroxybenzoate	0.839455	0.991929	-	-
C00879_Mucate	0.839455	0.991929	-	-
C00179_Agmatine	0.839661	0.991929	-	-
C00491_Cystine	0.842646	0.991929	-	-
C00364_dTMP	0.8442	0.991929	-	-
C01046_N_Methylglutamate	0.845183	0.991929	-	-
C00099_beta_Ala	0.84758	0.991929	-	-
C10833_Syringate	0.856335	0.991929	-	-
C05562_4_Hydroxymethylimidazole	0.856335	0.991929	-	-
C00475_Cytidine	0.86251	0.991929	-	-
C00158_Citrate	0.863147	0.991929	-	-
C05584_4_Hydroxy_3_methoxymandelate	0.865943	0.991929	-	-
C01262_Anserine	0.870141	0.991929	-	-
C02504_2_Isopropylmalate	0.871142	0.991929	-	-
C00008_ADP	0.872983	0.991929	-	-
C00024_AcetylCoA	0.875716	0.991929	-	-
C01620_Threonate	0.878339	0.991929	-	-
C00534_Pyridoxamine	0.878885	0.991929	-	-
C06772_Diethanolamine	0.87939	0.991929	-	-
C00212_Adenosine	0.87939	0.991929	-	-
C00246_Butyrate	0.87939	0.991929	-	-
f__SDMA	0.887196	0.991929	-	-
C00025_Glu	0.895372	0.991929	-	-
C00371_trans_Zeatin	0.895813	0.991929	-	-
C03592_5_Methyl_2_deoxycytidine	0.900273	0.991929	-	-
C00086_Urea	0.911302	0.991929	-	-
C00632_3_Hydroxyanthranilate	0.911311	0.991929	-	-
C00233_4_Methyl_2_oxopentanoate	0.911311	0.991929	-	-
C00606_Cysteinesulfinate	0.911311	0.991929	-	-
C01042_N_Acetylaspartate	0.911389	0.991929	-	-
C01198_3__2_Hydroxyphenyl_propionate	0.913133	0.991929	-	-
C00637_Indole_3_acetaldehyde	0.918517	0.991929	-	-
C01104_TrimethylamineN_oxide	0.918517	0.991929	-	-
C07151_Metformin	0.921762	0.991929	-	-
C00864_Pantothenate	0.923582	0.991929	-	-
C00791_Creatinine	0.927456	0.991929	-	-
C00186_Lactate	0.927456	0.991929	-	-
C00213_Sarcosine	0.927456	0.991929	-	-
C01089_3_Hydroxybutyrate	0.929159	0.991929	-	-
C03283_2_4_Diaminobutyrate	0.934854	0.991929	-	-
C00380_Cytosine	0.935761	0.991929	-	-
C06337_Terephthalate	0.937892	0.991929	-	-
C02787_Isobutylamine	0.937892	0.991929	-	-
C00860_Histidinol	0.940064	0.991929	-	-
C00073_Met	0.943546	0.991929	-	-
C00037_Gly	0.943546	0.991929	-	-
C00257_Gluconate	0.946716	0.991929	-	-
C00197_3PG	0.947795	0.991929	-	-
C01073_N_Acetyl_beta_alanine	0.948921	0.991929	-	-
C02918_1_Methylnicotinamide	0.949882	0.991929	-	-
C02230_3_Methylguanine	0.95409	0.991929	-	-
C00993_Ala_Ala	0.95966	0.991929	-	-
C00318_Carnitine	0.95966	0.991929	-	-
C02710_N_Acetylleucine	0.972445	0.991929	-	-
C02494_1_Methyladenosine	0.973116	0.991929	-	-
C00263_Homoserine	0.975787	0.991929	-	-
C02356_2AB	0.975789	0.991929	-	-
C02890_Tetrahydropalmatine	0.982227	0.991929	-	-
C03375_Bis_3_aminopropyl_amine	0.982227	0.991929	-	-
C00835_Sepiapterin	0.982227	0.991929	-	-
C00106_Uracil	0.982227	0.991929	-	-
C04037_Galacturonate1_phosphate	0.982227	0.991929	-	-
C00242_Guanine	0.983433	0.991929	-	-
C03570_Mannosamine	0.991221	0.991929	-	-
C01879_5_Oxoproline	0.99191	0.991929	-	-
C00429_Dihydrouracil	0.99191	0.991929	-	-
C00114_Choline	0.991929	0.991929	-	-
Notes
microbiome features that overlap between different annotations
microbiome features that were enriched in gastrectomy
