# Supplementary material for: Influence of gastrectomy for gastric cancer treatment on faecal microbiome and metabolome profiles
Source: HighWire-hosted journal article supplement (doi:10.1136/gutjnl-2019-319188), 2020-01-16
Supplement: gutjnl-2019-319188supp017_data_supplement.xls [file gutjnl-2019-319188supp017_data_supplement.xls]

## Sheet: mOTU_annotation
Supplementary Table S10. Significantly different taxa between gastrectomy and control groups and their associated clinical information (annotation with mOTU)
a. Phylum (statistically significant: LEfSe: P≤0.05; q≤0.1; LDA score≥2.0)
Phylum	P value	FDR	LDA score	Enriched in	Log2FC
Actinobacteria	0.000287413	0.00287413	4.33089	Control	-1.92867
Verrucomicrobia	0.0041216	0.020608	3.8628	Gastrectomy	2.63567
Proteobacteria	0.0242564	0.0606409	4.23679	Gastrectomy	0.667188
Bacteroidetes	0.130387	0.260774	-	Control	-0.197301
Euryarchaeota	0.19803	0.33005	-	Gastrectomy	2.99963
Synergistetes	0.283268	0.390332	-	Gastrectomy	0.395892
Deinococcus_Thermus	0.312265	0.390332	-	Control	-0.908963
Fusobacteria	0.809563	0.899515	-	Control	-4.36851
Firmicutes	0.954578	0.954578	-	Control	-0.0568933
b. Class (statistically significant: LEfSe: P≤0.05; q≤0.1; LDA score≥2.0)
Class	P value	FDR	LDA score	Enriched in	Log2FC
Bacilli	6.00934e-05	0.00102159	4.05678	Gastrectomy	0.797579
Actinobacteria	0.000287413	0.00244301	4.26013	Control	-1.92867
Verrucomicrobiae	0.0041216	0.0214744	3.38669	Gastrectomy	2.63606
Gammaproteobacteria	0.00505281	0.0214744	4.18736	Gastrectomy	0.777427
Epsilonproteobacteria	0.0226115	0.0640658	4.03363	Gastrectomy	0.634755
Clostridia	0.0403134	0.0979039	4.2595	Control	-0.326924
Bacteroidia	0.133635	0.283975	-	Control	-0.197166
Methanobacteria	0.19803	0.374057	-	Gastrectomy	2.99962
Negativicutes	0.246796	0.401297	-	Gastrectomy	0.0443921
Flavobacteriia	0.275752	0.401297	-	Control	-0.249029
Synergistia	0.283268	0.401297	-	Gastrectomy	0.395875
Deinococci	0.312265	0.408347	-	Control	-0.908962
Erysipelotrichia	0.389396	0.472838	-	Gastrectomy	0.134744
Deltaproteobacteria	0.422234	0.478532	-	Control	-0.221486
Betaproteobacteria	0.800124	0.809563	-	Control	-0.360192
Fusobacteriia	0.809563	0.809563	-	Control	-4.36852
c. Order (statistically significant: LEfSe: P≤0.05; q≤0.1; LDA score≥2.0)
Order	P value	FDR	LDA score	Enriched in	Log2FC
Lactobacillales	4.97613e-05	0.00119427	4.05897	Gastrectomy	0.808731
Bifidobacteriales	0.00345674	0.0315255	4.2316	Control	-2.2572
Verrucomicrobiales	0.0041216	0.0315255	3.37289	Gastrectomy	2.63606
Enterobacteriales	0.00525425	0.0315255	4.1447	Gastrectomy	0.711119
Coriobacteriales	0.0156236	0.0624943	3.28992	Control	-0.654188
Campylobacterales	0.0226115	0.077525	4.13676	Gastrectomy	0.634756
Clostridiales	0.0403134	0.12094	-	Control	-0.326927
Neisseriales	0.0618583	0.164955	-	Gastrectomy	1.46408
Bacteroidales	0.133635	0.320724	-	Control	-0.197166
Methanobacteriales	0.19803	0.432066	-	Gastrectomy	2.99962
Selenomonadales	0.246796	0.453229	-	Gastrectomy	0.0443921
Actinomycetales	0.265337	0.453229	-	Control	-0.214644
Flavobacteriales	0.275752	0.453229	-	Control	-0.249029
Synergistales	0.283268	0.453229	-	Gastrectomy	0.395875
Thermales	0.312265	0.468398	-	Control	-0.908962
Pasteurellales	0.332625	0.469588	-	Gastrectomy	0.314628
Erysipelotrichales	0.389396	0.519194	-	Gastrectomy	0.134744
Desulfovibrionales	0.412919	0.521583	-	Control	-0.222822
Aeromonadales	0.556077	0.667292	-	Gastrectomy	4.03042
Bacillales	0.625843	0.715249	-	Control	-0.768455
Fusobacteriales	0.809563	0.88316	-	Control	-4.36852
Burkholderiales	0.874141	0.912147	-	Control	-0.381498
Pseudomonadales	0.975069	0.975069	-	Gastrectomy	1.13115
d. Family (statistically significant: LEfSe: P≤0.05; q≤0.1; LDA score≥2.0)
Family	P value	FDR	LDA score	Enriched in	Log2FC
Lactobacillaceae	0.00027832	0.0110662	3.67181	Gastrectomy	1.77929
Streptococcaceae	0.000814198	0.0110662	3.91968	Gastrectomy	0.629137
Rikenellaceae	0.000829962	0.0110662	3.61949	Gastrectomy	1.06114
Lachnospiraceae	0.00281562	0.0257561	4.10218	Control	-0.700628
Bifidobacteriaceae	0.00345674	0.0257561	4.2028	Control	-2.25696
Verrucomicrobiaceae	0.0041216	0.0257561	3.26397	Gastrectomy	2.63582
Prevotellaceae	0.00454121	0.0257561	4.43927	Gastrectomy	0.935326
Enterobacteriaceae	0.00525425	0.0257561	4.17488	Gastrectomy	0.71115
Bacteroidaceae	0.00625641	0.0257561	4.71611	Control	-0.618086
Veillonellaceae	0.00643902	0.0257561	3.59403	Gastrectomy	0.124326
Coriobacteriaceae	0.0156236	0.0492788	3.06493	Control	-0.654296
Campylobacteraceae	0.0160156	0.0492788	3.87372	Gastrectomy	0.613335
ClostridialesFamilyXI_IncertaeSedis	0.01972	0.0563428	3.44337	Control	-1.95596
Oxalobacteraceae	0.0280604	0.0748276	3.61325	Gastrectomy	5.24396
Neisseriaceae	0.0565659	0.138297	-	Gastrectomy	1.43647
Micrococcaceae	0.0587762	0.138297	-	Gastrectomy	0.155057
Ruminococcaceae	0.0851734	0.189274	-	Control	-0.456121
Eubacteriaceae	0.181754	0.3772	-	Gastrectomy	0.231237
Bacillaceae	0.193208	0.3772	-	Control	-0.817459
Methanobacteriaceae	0.19803	0.3772	-	Gastrectomy	2.99965
Flavobacteriaceae	0.278966	0.492641	-	Control	-0.262453
Synergistaceae	0.283268	0.492641	-	Gastrectomy	0.395183
Thermaceae	0.312265	0.512125	-	Control	-0.908663
Pasteurellaceae	0.332625	0.512125	-	Gastrectomy	0.314812
Porphyromonadaceae	0.332881	0.512125	-	Control	-0.0241654
Erysipelotrichaceae	0.389396	0.576883	-	Gastrectomy	0.1347
Desulfovibrionaceae	0.412919	0.588303	-	Control	-0.223047
Peptostreptococcaceae	0.42652	0.588303	-	Gastrectomy	0.987289
Enterococcaceae	0.510023	0.679195	-	Control	-0.507819
Pseudomonadaceae	0.538424	0.679195	-	Gastrectomy	1.10458
Carnobacteriaceae	0.543356	0.679195	-	Gastrectomy	0.367217
Leuconostocaceae	0.652773	0.767968	-	Gastrectomy	2.33233
Actinomycetaceae	0.708813	0.810072	-	Control	-0.78643
Clostridiaceae	0.761295	0.827733	-	Gastrectomy	0.224396
Fusobacteriaceae	0.765653	0.827733	-	Control	-4.37351
Aeromonadaceae	0.81428	0.857137	-	Gastrectomy	4.11079
Sutterellaceae	0.913883	0.937316	-	Control	-0.609026
Acidaminococcaceae	0.939012	0.939012	-	Control	-0.101319
e. Genus (statistically significant: LEfSe: P≤0.05; q≤0.1; LDA score≥2.0) and SparCC network property
Genus	P value	FDR	LDA score	Enriched in	Log2FC	Gastrectomy group network		Control group network
						Degree	Strength	Degree	Strength	Betweeness
Eggerthella	9.40408e-07	7.1471e-05	2.6918	Control	-2.28227	3	1.32552	4	2.19019	0
Veillonella	3.73632e-05	0.0014198	3.56464	Gastrectomy	0.357734	6	2.65288	7	2.91321	14
Lactobacillus	0.00027832	0.00528809	3.69533	Gastrectomy	1.7833	1	0.298475	9	2.86368	19
Coprobacillus	0.000453924	0.00689965	2.07214	Control	-1.49586	1	0.411107	9	3.59291	6
Prevotella	0.000635406	0.00788464	4.41898	Gastrectomy	0.951225	1	0.312697	4	1.13974	10
Streptococcus	0.000814198	0.00788464	3.89623	Gastrectomy	0.631554	3	1.04258	6	2.72014	0
Alistipes	0.000829962	0.00788464	3.62104	Gastrectomy	1.06051	4	1.35239	8	2.59449	17
Roseburia	0.00127387	0.0107572	3.37641	Gastrectomy	0.284148	1	0.448668	4	1.08389	2
Solobacterium	0.00186474	0.014172	2.89341	Gastrectomy	0.703755
Bifidobacterium	0.00338686	0.0216221	4.24239	Control	-2.25974	3	1.25283	4	1.02148	5
Klebsiella	0.00341402	0.0216221	3.85216	Gastrectomy	1.41622	2	0.581874	1	0.447947	0
Akkermansia	0.0041216	0.0240955	3.2698	Gastrectomy	2.6358	1	0.27372	2	0.426482	1
Odoribacter	0.00453277	0.0246065	2.65944	Gastrectomy	0.676426	1	0.383602	4	1.14207	2
Bacteroides	0.00625641	0.0316992	4.70917	Control	-0.618972
Anaerotruncus	0.00926272	0.0410001	2.26032	Control	-0.756406	3	1.16817	7	2.18204	22
Parvimonas	0.00971056	0.0410001	2.45308	Control	-1.88373
Campylobacter	0.0160156	0.0640624	2.7346	Gastrectomy	0.613355
Atopobium	0.0183673	0.0682343	2.90708	Gastrectomy	0.14724	2	0.525162	4	1.72761	1
Coprococcus	0.0188542	0.0682343	2.70319	Gastrectomy	0.374657	1	0.569387	4	1.18341	3
Blautia	0.0215991	0.0746149	3.72956	Control	-1.09564	3	1.19966	5	2.38671	0
Oxalobacter	0.0280604	0.0927212	2.56144	Gastrectomy	5.24385
Salmonella	0.0360578	0.114183	-	Control	-1.4098
Desulfovibrio	0.03895	0.118408	-	Gastrectomy	0.343076
Subdoligranulum	0.04363	0.127534	-	Control	-1.37756
Selenomonas	0.0482724	0.132679	-	Gastrectomy	1.00889
Anaerostipes	0.0488816	0.132679	-	Control	-0.553184
Neisseria	0.0529944	0.138882	-	Gastrectomy	1.53707
Rothia	0.0621508	0.157449	-	Gastrectomy	0.15772
Parasutterella	0.0681813	0.164898	-	Control	-0.304005
Aggregatibacter	0.0694308	0.164898	-	Gastrectomy	0.949269
Filifactor	0.0754362	0.173732	-	Control	-1.21116
Oribacterium	0.0784161	0.175283	-	Gastrectomy	1.03028
Megasphaera	0.0955411	0.207461	-	Control	-1.92368
Ruminococcus	0.116523	0.245993	-	Control	-0.536475
Turicibacter	0.128273	0.263479	-	Control	-0.0938595
Methanobrevibacter	0.13244	0.26488	-	Gastrectomy	2.95936
Pseudoflavonifractor	0.156745	0.305451	-	Control	-0.744654
Eubacterium	0.181754	0.345332	-	Gastrectomy	0.230932
Bacillus	0.193208	0.358141	-	Control	-0.8175
Enterobacter	0.232544	0.417858	-	Gastrectomy	1.49457
Dialister	0.23642	0.417858	-	Control	-0.0426182
Capnocytophaga	0.269401	0.458051	-	Control	-0.227695
Dorea	0.278888	0.458051	-	Control	-0.0748539
Faecalibacterium	0.279154	0.458051	-	Control	-0.413992
Pyramidobacter	0.283268	0.458051	-	Gastrectomy	0.395325
Butyrivibrio	0.327201	0.518068	-	Gastrectomy	9.12254
Haemophilus	0.351933	0.545856	-	Gastrectomy	0.309575
Escherichia	0.363438	0.552425	-	Gastrectomy	0.431987
Acidaminococcus	0.405312	0.603995	-	Control	-0.42398
Lactococcus	0.421906	0.605502	-	Control	-1.51955
Paraprevotella	0.422258	0.605502	-	Control	-0.690703
Peptostreptococcus	0.506149	0.680031	-	Control	-1.58698
Pseudomonas	0.506852	0.680031	-	Gastrectomy	1.09786
Finegoldia	0.506852	0.680031	-	Control	-2.33819
Enterococcus	0.510023	0.680031	-	Control	-0.507803
Bilophila	0.545347	0.710776	-	Control	-0.37385
Granulicatella	0.551787	0.710776	-	Gastrectomy	0.365577
Parabacteroides	0.680786	0.83654	-	Control	-0.132934
Catonella	0.70347	0.83654	-	Control	-1.82171
Actinomyces	0.718256	0.83654	-	Control	-0.78794
Phascolarctobacterium	0.730466	0.83654	-	Gastrectomy	0.0732366
Citrobacter	0.733558	0.83654	-	Gastrectomy	1.80663
Shigella	0.746003	0.83654	-	Control	-3.21122
Cronobacter	0.755101	0.83654	-	Control	-2.09117
Actinobacillus	0.757191	0.83654	-	Gastrectomy	0.296279
Sutterella	0.761214	0.83654	-	Control	-0.618553
Holdemania	0.765	0.83654	-	Control	-0.205152
Fusobacterium	0.770498	0.83654	-	Control	-4.37578
Mitsuokella	0.838962	0.898044	-	Control	-1.71495
Collinsella	0.889165	0.932153	-	Control	-0.389874
Meiothermus	0.895357	0.932153	-	Control	-0.756697
Clostridium	0.934429	0.949892	-	Gastrectomy	0.253022
Aeromonas	0.937393	0.949892	-	Gastrectomy	4.10957
Gemella	0.967106	0.967106	-	Control	-0.781148
f. Species (statistically significant: LEfSe: P≤0.05; q≤0.1; LDA score≥2.0. MaAsLin:P≤0.005; q≤0.1 )
Species	P value	FDR	LDA score	Enriched in	Log2FC	demographic association (coefficient)*	Adjusted coefficient**
Ruminococcus gnavus	7.25e-09	1.94e-06	3.90652	Control	-4.16849	Control+ (0.07022741), BMI+ (0.00864003)	Control+ (0.05945855)
Lachnospiraceae bacterium 2_1_58FAA	1.75e-08	2.34e-06	3.43915	Control	-4.16647	Control+ (0.0421646), BMI+ (0.00528338)	Control+ (0.03437803)
Eggerthella lenta	1.15e-06	0.000102363	2.50244	Control	-3.26039	Control+ (0.0089492)	Control+ (0.0101799)
Veillonella atypica	2.1e-06	0.000137227	3.23614	Gastrectomy	0.39306	Control- (-0.0417616)	Control- (-0.0402764)
Veillonella parvula	2.56e-06	0.000137227	2.85984	Gastrectomy	0.134191	Control- (-0.0240856)
Roseburia hominis	3.62e-06	0.000161672	3.33765	Gastrectomy	1.25061	Control- (-0.0314879), BMI- (-0.004382416)
Streptococcus anginosus	5.38e-06	0.000206144	2.84695	Gastrectomy	2.65283	Control- (-0.0086734)
Veillonella dispar	7.08e-06	0.000225493	2.96917	Gastrectomy	0.0941734	Control- (-0.0234171)
Streptococcus vestibularis	7.57e-06	0.000225493	3.20167	Gastrectomy	1.00535	Control- (-0.02035083)	Control- (-0.0201307)
Prevotella buccae	1.39e-05	0.000373253	2.64002	Gastrectomy	4.70036
Veillonella sp. 6_1_27	1.6e-05	0.000389107	2.43708	Gastrectomy	0.0202215	Control- ( -0.0154712)	Control- (-0.0147199)
Streptococcus mutans	2.51e-05	0.000561348	2.3292	Control	-1.06574	Control- (-0.0103090), Age+ (0.00041435)	Control- (-0.0104173)
Streptococcus salivarius	2.91e-05	0.000600516	3.91478	Gastrectomy	0.443121	Control- (-0.0651934)	Control- (-0.0707836)
Streptococcus gordonii	3.53e-05	0.000654848	2.12145	Gastrectomy	0.101725	Control-(-0.0062107)
Clostridium sp. HGF2	3.67e-05	0.000654848	2.4116	Control	-3.16996	Control+ (0.0053701)	Control+ (0.00624849)
Veillonella sp. 3_1_44	6.29e-05	0.00105343	2.59092	Control	-0.467718	Control- (-0.0137541)
Veillonella sp. oraltaxon158	0.000125317	0.00197558	3.16066	Gastrectomy	2.32217	Control- (-0.0110329)
Streptococcus sp. C150	0.000160296	0.00235926	2.64111	Gastrectomy	0.980357	Control- (-0.0064938)	Control- (-0.0070406)
Coprobacillus sp. D7	0.000167613	0.00235926	2.47143	Control	-1.83402	Control+ (0.01164953)	Control+ (0.0125486)
Alistipes shahii	0.000176064	0.00235926	3.35074	Gastrectomy	1.37632	Control- (-0.02977367)
Streptococcus downei	0.000306888	0.00379398	2.39256	Gastrectomy	5.49023	Control- (-0.0019165)
Streptococcus sp. 2_1_36FAA	0.000311446	0.00379398	2.01491	Gastrectomy	-0.113325	Control- (-0.00691741)	Control- (-0.0083989)
Clostridium spiroforme	0.000505662	0.00589206	2.20185	Control	-0.67436
Roseburia inulinivorans	0.000578748	0.00646268	3.30159	Gastrectomy	0.450565	Control- (-0.04360268)
Clostridium ramosum	0.000614515	0.0065876	2.83258	Control	-2.12442	Control+ (0.0188951)	Control+ (0.01829566)
Eubacterium biforme	0.000727931	0.00750329	3.33689	Gastrectomy	1.53009
Eggerthella sp. 1_3_56FAA	0.000798849	0.007748	2.30733	Control	-1.99966		Control+ (0.00822814)
Prevotella denticola	0.000809493	0.007748	2.59936	Gastrectomy	2.73424	Control- (-0.0014483)
Prevotella veroralis	0.000864846	0.00799237	2.70162	Gastrectomy	4.75203
Solobacterium moorei	0.000906849	0.00804883	2.87842	Gastrectomy	0.703499	Control- (-0.0031443)	Control- (-0.0053228)
Bifidobacterium longum	0.000931021	0.00804883	3.92411	Control	-2.57739	Control+ (0.03369322)	Control+ (0.0412134)
Streptococcus parasanguinis	0.00114197	0.00956401	3.37988	Gastrectomy	0.343407	Control- (-0.03470150)	Control- (-0.0455896)
Bacteroides intestinalis	0.00128082	0.0104018	3.66215	Gastrectomy	3.65454
Alistipes putredinis	0.00161507	0.0123996	3.83907	Gastrectomy	1.11619
Ruminococcus obeum	0.00161936	0.0123996	3.04697	Gastrectomy	0.301917
Eubacterium eligens	0.00173111	0.0128871	3.61082	Gastrectomy	0.317269	BMI- (-0.010836413)
Lactobacillus oris	0.00209803	0.0151966	2.52649	Gastrectomy	2.88964	Stop drinking+ (0.01402834)
Klebsiella pneumoniae	0.00239764	0.0163767	4.01651	Gastrectomy	1.9499
Streptococcus sp. Oral taxon071	0.0024193	0.0163767	2.4123	Gastrectomy	0.437321
Klebsiella variicola	0.00244429	0.0163767	2.67039	Control	-2.07055
Fusobacterium nucleatum	0.0034077	0.0215786	2.31842	Gastrectomy	0.245981	Control- (-0.0041605)
Akkermansia muciniphila	0.00345488	0.0215786	3.51134	Gastrectomy	2.63741
Streptococcus peroris	0.00346224	0.0215786	2.81916	Gastrectomy	0.389032
Odoribacter splanchnicus	0.00363353	0.0221315	3.05132	Gastrectomy	0.677826
Coprococcus eutactus	0.00399306	0.0237809	2.85875	Gastrectomy	3.63244
Klebsiella sp. 1_1_55	0.00413261	0.0240769	2.77555	Control	-2.466
Streptococcus pasteurianus	0.0049875	0.0284394	2.43231	Gastrectomy	0.614398
Streptococcus infantis	0.00545728	0.0304698	2.34726	Gastrectomy	0.0869694
Eggerthella sp. HGA1	0.00583484	0.0313604	2.37525	Control	-1.71349
Anaerotruncus colihominis	0.00585081	0.0313604	2.14174	Control	-0.754095	Control- (-0.004205681)
Streptococcus gallolyticus	0.00606597	0.0318761	2.25814	Gastrectomy	1.56991
Atopobium rimae	0.00782893	0.0397824	2.76752	Gastrectomy	0.256267
Bifidobacterium dentium	0.00786742	0.0397824	2.95467	Control	-1.87886	Age+ (0.000577675)
Desulfovibrio piger	0.00849459	0.0421583	2.32218	Gastrectomy	0.37047
Lactobacillus gasseri	0.00887656	0.0432531	3.04091	Gastrectomy	3.85309
Fusobacterium periodonticum	0.00936114	0.0447997	2.26014	Gastrectomy	1.17485
Lactobacillus salivarius	0.0100366	0.0464385	3.30756	Gastrectomy	0.388755	Control- (-0.0045147)
Bifidobacterium breve	0.0100894	0.0464385	2.13316	Control	-0.591271
Lachnospiraceae bacterium 9_1_43BFAA	0.0102234	0.0464385	3.18707	Control	-3.89581
Prevotella melaninogenica	0.0106014	0.0473527	2.5226	Gastrectomy	3.69393		Control- (-0.00194858)
Streptococcus equinus	0.011318	0.0497248	3.38726	Gastrectomy	1.89785
Lactobacillus fermentum	0.0115565	0.0499539	2.40596	Gastrectomy	0.988628	Age+ (0.000228088)
Streptococcus sanguinis	0.0120289	0.0505466	2.25366	Gastrectomy	0.515081
Parasutterella excrementihominis	0.0121233	0.0505466	2.27474	Gastrectomy	-0.0274011
Collinsella intestinalis	0.0122594	0.0505466	2.67171	Control	-1.86129
Clostridium sp. 7_2_43FAA	0.0137106	0.0556735	2.97066	Control	-5.90868
butyrate producing bacterium SS3_4	0.0142039	0.0568157	3.04604	Gastrectomy	0.541741
Lachnospiraceae bacterium 3_1_46FAA	0.0153544	0.0605142	2.91073	Control	-1.92506
Parvimonas micra	0.0175646	0.0678497	2.42647	Control	-1.68698
Bifidobacterium catenulatum	0.0177219	0.0678497	2.6666	Control	-3.59437
Lactobacillus vaginalis	0.0196744	0.0742639	2.38231	Gastrectomy	3.91216
Fusobacterium varium	0.0201341	0.0747065	2.50908	Control	-8.38088
Bifidobacterium pseudocatenulatum	0.0205312	0.0747065	3.75904	Control	-3.69343
Bacteroides sp. 1_1_6	0.0208699	0.0747065	2.75368	Gastrectomy	-0.137104
Atopobium parvulum	0.0209067	0.0747065	2.89673	Gastrectomy	0.0548758
Lachnospiraceae bacterium 2_1_46FAA	0.0234319	0.0823516	2.85425	Control	-8.23362
Enterobacter aerogenes	0.0237721	0.0823516	3.20303	Gastrectomy	3.16484
Blautia hansenii	0.024145	0.0823516	2.68952	Control	-4.39948	Drinking+ (0.05300170)
Burkholderiales bacterium 1_1_47	0.0242753	0.0823516	2.44759	Gastrectomy	1.29686
Dorea longicatena	0.0251445	0.0842342	2.89248	Control	-0.474528
Streptococcus sp_M143	0.0265201	0.0877456	2.56739	Gastrectomy	0.266629
Haemophilus aegyptius	0.0272342	0.0890094	3.05974	Gastrectomy	1.39402
Campylobacter concisus	0.0285204	0.0920901	2.52908	Gastrectomy	0.878672
Oxalo bacterformigenes	0.0298948	0.0953785	2.70268	Gastrectomy	5.24382
Salmonella enterica	0.0304816	0.0961066	2.30778	Control	-1.615
Lachnospiraceae bacterium 5_1_63FAA	0.0311755	0.0971515	3.30121	Control	-1.37552
Megasphaera micronuciformis	0.0321763	0.0981357	2.29741	Control	-1.40231
Lachnospiraceae bacterium 8_1_57FAA	0.0322237	0.0981357	2.61639	Control	-2.39289
Eubacterium hallii	0.0336274	0.101029	-	Control	-0.076119
Streptococcus sp_C300	0.0339276	0.101029	-	Control	-0.207038
Streptococcus australis	0.034672	0.101428	-	Control	-0.247465
Streptococcus oralis	0.0348186	0.101428	-	Control	-0.0310777
Streptococcus thermophilus	0.0367436	0.104154	-	Control	-1.41922
Bacteroides caccae	0.0368004	0.104154	-	Control	-0.164083
Lachnospiraceae bacterium 4_1_37FAA	0.0369202	0.104154	-	Control	-4.56907
Anaerostipes sp_3_2_56FAA	0.038024	0.10615	-	Control	-0.0366304
Roseburia intestinalis	0.038484	0.106327	-	Control	-0.810424
Fusobacterium ulcerans	0.0393692	0.107663	-	Control	-5.17566
Bacteroides sp. 1_1_14	0.0447679	0.12119	-	Gastrectomy	0.30785
Aggregatibacter segnis	0.0459947	0.123266	-	Gastrectomy	1.16393
Oribacterium sinus	0.0510663	0.135503	-	Gastrectomy	1.25497
Fusobacterium mortiferum	0.0549343	0.143966	-	Control	-4.62703
Anaerostipes caccae	0.0553304	0.143966	-	Control	-1.009
Bacteroides finegoldii	0.0620376	0.159866	-	Control	-0.362016
Streptococcus mitis	0.0636544	0.16247	-	Gastrectomy	0.122656
Dorea formicigenerans	0.0718218	0.181587	-	Gastrectomy	0.25098
Streptococcus macedonicus	0.0750264	0.187194	-	Gastrectomy	3.13933
Filifactor alocis	0.0754362	0.187194	-	Control	-1.20702
Bacteroides sp. 2_2_4	0.0775093	0.190573	-	Control	-1.38506
Clostridium sp. L2_50	0.0815784	0.198755	-	Control	-0.724308
Rothia mucilaginosa	0.0828298	0.199985	-	Gastrectomy	0.177638
Bacteroides thetaiotaomicron	0.0851293	0.203702	-	Gastrectomy	0.150622
Lactobacillus reuteri	0.0866303	0.205459	-	Gastrectomy	13.4498
Subdoligranulum variabile	0.0888934	0.206095	-	Control	-1.37643
Streptococcus pneumoniae	0.0893855	0.206095	-	Gastrectomy	0.0171458
Lachnospiraceae bacterium 1_4_56FAA	0.0894618	0.206095	-	Control	-3.04006
Clostridium scindens	0.0899744	0.206095	-	Control	-1.62028
Coprococcus comes	0.0914054	0.207599	-	Gastrectomy	0.176915
Clostridium sp. D5	0.0941312	0.211993	-	Gastrectomy	0.0577309
Bifidobacterium angulatum	0.0957438	0.213828	-	Control	-0.812314
Alistipes sp. HGB5	0.0996674	0.220751	-	Gastrectomy	0.160312
Bifidobacterium sp. 12_1_47BFAA	0.103781	0.227977	-	Control	-1.24518
Streptococcus sp. M334	0.110489	0.240739	-	Gastrectomy	0.248941		Control- (-0.0044178)
Clostridium perfringens	0.11552	0.248821	-	Gastrectomy	2.58506
Turicibacter sp. HGF1	0.116054	0.248821	-	Control	-0.611527
Turicibacter sanguinis	0.1208	0.256939	-	Gastrectomy	0.388999
Blautia hydrogenotrophica	0.129032	0.272287	-	Control	-4.83153
Bacteroides sp. 20_3	0.136391	0.285569	-	Gastrectomy	0.512083
butyrate_producing bacterium SSC_2	0.137714	0.286103	-	Control	-1.74902
Methanobrevibacter smithii	0.140072	0.288764	-	Gastrectomy	2.95997
Lachnospiraceae bacterium 6_1_63FAA	0.151329	0.309588	-	Control	-4.13767	Drinking+ (0.03938463)
Gemella haemolysans	0.15994	0.324727	-	Control	-0.264197
Eubacterium limosum	0.16648	0.335462	-	Control	-1.16699
Ruminococcus sp. 5_1_39BFAA	0.171616	0.342855	-	Control	-1.02137
Clostridium leptum	0.172707	0.342855	-	Control	-0.191086
Clostridiales bacterium 1_7_47FAA	0.176455	0.34322	-	Control	-0.0441386
Bacteroides vulgatus	0.178631	0.34322	-	Control	-0.583882
Clostridium sp. SS2_1	0.178741	0.34322	-	Control	-0.307059
Streptococcus infantarius	0.179008	0.34322	-	Gastrectomy	4.76767
Ruminococcus torques	0.179294	0.34322	-	Control	-0.338793
Eubacterium rectale	0.185013	0.351656	-	Gastrectomy	0.0107881
Lactobacillus crispatus	0.186523	0.352029	-	Gastrectomy	0.635705
Clostridium bartlettii	0.192311	0.360415	-	Gastrectomy	1.24831
Dialister invisus	0.196277	0.365292	-	Control	-0.0426153
Pseudomonas aeruginosa	0.201489	0.372407	-	Gastrectomy	1.07937
Ruminococcus bromii	0.210755	0.38605	-	Gastrectomy	0.135389
Ruminococcus lactaris	0.211751	0.38605	-	Gastrectomy	0.118824
Haemophilus parainfluenzae	0.215654	0.390508	-	Gastrectomy	0.351263
Bacteroides sp. D22	0.22149	0.398385	-	Control	-1.19541
Bifidobacterium animalis	0.230306	0.41148	-	Control	-1.56958
Bacteroides sp. 3_2_5	0.232459	0.412576	-	Control	-2.90446
Streptococcus cristatus	0.234023	0.41262	-	Control	-0.117166
Bacteroides xylanisolvens	0.237775	0.415206	-	Control	-0.0595418
Lachnospiraceae bacterium 5_1_57FAA	0.238588	0.415206	-	Control	-3.30186
Parabacteroides merdae	0.243791	0.418856	-	Control	-0.0876087
Haemophilus pittmaniae	0.244903	0.418856	-	Control	-0.172857	GastricAcidMed+ (0.00739)
Clostridium symbiosum	0.245375	0.418856	-	Control	-0.894533
Bacteroides sp. 3_1_33FAA	0.249245	0.4222	-	Control	-2.02277
Lactobacillus casei	0.250484	0.4222	-	Gastrectomy	1.12331
Bacillus subtilis	0.270875	0.453716	-	Control	-0.755498
Pyramidobacter piscolens	0.279208	0.464769	-	Gastrectomy	0.398925
Bacteroides sp. D20	0.281951	0.466438	-	Control	-0.0111278
Bacteroides stercoris	0.284499	0.467765	-	Control	-0.735556
Ruminococcus sp. SR1_5	0.289166	0.472539	-	Control	-1.03623
Ruminococcaceae bacterium D16	0.293286	0.476368	-	Control	-0.319616
Lactobacillus plantarum	0.296959	0.479427	-	Gastrectomy	4.1755
Megasphaer aelsdenii	0.307808	0.488216	-	Control	-2.19047
Shigella boydii	0.308466	0.488216	-	Control	-1.37256
Enterobacter hormaechei	0.309689	0.488216	-	Gastrectomy	1.84127
Neisseria mucosa	0.309689	0.488216	-	Gastrectomy	1.23252
Aeromonas caviae	0.311838	0.488729	-	Gastrectomy	9.35058
Rothia dentocariosa	0.322329	0.502233	-	Control	-0.0386271
Parvimonas sp. Oral taxon 110	0.326066	0.505119	-	Control	-3.13088
Capnocytophaga sp oral taxon 329	0.333923	0.511692	-	Control	-0.227264
Escherichia coli	0.334127	0.511692	-	Gastrectomy	0.461149
Bacteroides sp. 2_1_16	0.342471	0.519713	-	Control	-2.26222
Bacteroides sp. 3_1_23	0.343243	0.519713	-	Control	-1.17401
Haemophilus haemolyticus	0.353111	0.529479	-	Gastrectomy	0.25438
Bifidobacterium bifidum	0.354225	0.529479	-	Control	-1.03853
Bacteroides sp. 3_1_19	0.35562	0.529479	-	Control	-0.270246
Clostridium bolteae	0.363741	0.536859	-	Control	-1.07913
Streptococcus agalactiae	0.365419	0.536859	-	Control	-0.787048
Pseudoflavonifractor capillosus	0.366586	0.536859	-	Control	-0.735074
Acidaminococcus intestini	0.37405	0.544812	-	Control	-0.458108
Bacteroides ovatus	0.382437	0.553437	-	Control	-1.14462
Acidaminococcus sp. D21	0.384102	0.553437	-	Gastrectomy	0.0927112
Streptococcus pseudopneumoniae	0.403932	0.578898	-	Control	-0.211252
Bacteroides sp. 2_1_56FAA	0.408577	0.58244	-	Control	-4.39931
Paraprevotella xylaniphila	0.413637	0.586533	-	Control	-0.689087
Klebsiella oxytoca	0.420093	0.592553	-	Control	-1.94799
Bilophila wadsworthia	0.426194	0.598011	-	Control	-0.372717
Streptococcus constellatus	0.429988	0.600191	-	Gastrectomy	0.568838
Bacteroides clarus	0.433223	0.601574	-	Gastrectomy	0.244965
Granulicatella elegans	0.438845	0.605842	-	Gastrectomy	0.512338
Eubacterium ventriosum	0.442367	0.605842	-	Control	-0.542481
Shigella flexneri	0.443078	0.605842	-	Control	-4.55808
Lactobacillus delbrueckii	0.45464	0.618494	-	Gastrectomy	4.52598	Stop drinking+ (0.02805039)
Bifidobacterium adolescentis	0.458231	0.619903	-	Control	-1.76974
Citrobacter koseri	0.460301	0.619903	-	Gastrectomy	1.7043
Bacteroides sp. 4_3_47FAA	0.463417	0.620979	-	Control	-1.15187
Lachnospiraceae bacterium1_1_57FAA	0.47223	0.62672	-	Control	-0.775603
Granulicatella adiacens	0.472378	0.62672	-	Gastrectomy	0.35476
Clostridium butyricum	0.486856	0.639907	-	Control	-2.24304
Prevotella copri	0.489258	0.639907	-	Gastrectomy	0.945117
Coprococcus catus	0.489481	0.639907	-	Control	-0.111272
Erysipelotrichaceae bacterium 5_2_54FAA	0.505137	0.657169	-	Control	-3.10765
Clostridium saccharolyticum	0.511643	0.659635	-	Control	-0.548201
Citrobacter youngae	0.51258	0.659635	-	Gastrectomy	1.65227
Bacteroides coprocola	0.514417	0.659635	-	Control	-1.1507
Enterobacter cloacae	0.526528	0.66693	-	Gastrectomy	0.758222
Bacteroides fragilis	0.530392	0.66693	-	Control	-3.60475
Bacteroides eggerthii	0.53196	0.66693	-	Control	-0.481006
Bacteroides sp. 1_1_30	0.532029	0.66693	-	Control	-0.5399
Finegoldia magna	0.532549	0.66693	-	Control	-2.33868
Bacteroides pectinophilus	0.54668	0.681443	-	Gastrectomy	7.0311
Actinomyces viscosus	0.551297	0.684016	-	Control	-0.585337
Escherichia fergusonii	0.554478	0.684134	-	Control	-3.79135
Lactococcus lactis	0.556497	0.684134	-	Control	-0.947592
Peptostreptococcus stomatis	0.568415	0.695595	-	Control	-1.57343
Eubacterium cylindroides	0.573491	0.698617	-	Gastrectomy	2.15135
Phascolarctobacterium succinatutens	0.594858	0.721366	-	Gastrectomy	0.0737561
Enterococcus faecium	0.600174	0.724534	-	Control	-2.38207
Sutterella wadsworthensis	0.603378	0.725136	-	Control	-0.617219
Parabacteroides distasonis	0.607097	0.726348	-	Control	-0.366766
Holdemania filiformis	0.615153	0.732042	-	Control	-0.204492
Coprobacillus sp. 29_1	0.617319	0.732042	-	Gastrectomy	0.361279
Bacteroides plebeius	0.621787	0.734092	-	Control	-0.400658
Bacteroides sp. D2	0.629821	0.737653	-	Control	-1.43526
Cronobacter sakazakii	0.635335	0.737653	-	Control	-2.5648
Bacteroides dorei	0.635777	0.737653	-	Control	-1.16686
Clostridium sp. M62_1	0.635813	0.737653	-	Control	-0.0393362
Bacteroides sp. 9_1_42FAA	0.641839	0.739745	-	Control	-0.575194
Catonella morbi	0.644683	0.739745	-	Control	-1.81749
Desulfovibrio desulfuricans	0.645896	0.739745	-	Control	-0.444141
Shigella sonnei	0.653412	0.741974	-	Control	-4.69804
Bacteroides sp. 3_1_40A	0.65443	0.741974	-	Control	-0.794812
Streptococcus sp. Oral taxon056	0.656149	0.741974	-	Control	-0.171453
Parabacteroides sp. D13	0.659265	0.74199	-	Control	-0.508918
Gemella sanguinis	0.6617	0.74199	-	Control	-1.25681
Bacteroides sp. 2_1_7	0.665329	0.74295	-	Control	-1.12055
Actinomyces odontolyticus	0.680524	0.756765	-	Control	-0.956273
Citrobacter sp. 30_2	0.722895	0.800561	-	Gastrectomy	2.60889
Faecalibacterium prausnitzii	0.737304	0.813159	-	Control	-0.413424
Bacteroides sp. 2_1_33B	0.740805	0.813671	-	Control	-0.649342
Lachnospiraceae bacterium 3_1_57FAA_CT1	0.754705	0.825555	-	Control	-0.770015
Collinsella aerofaciens	0.758617	0.82646	-	Control	-0.375451
Bacteroides coprophilus	0.765756	0.83086	-	Control	-1.56019
Enterobacter cancerogenus	0.788925	0.850585	-	Control	-2.6431
Shigella dysenteriae	0.790282	0.850585	-	Control	-2.64943
Bacteroides sp. 4_1_36	0.795255	0.852513	-	Control	-0.0563122
Enterococcus casseliflavus	0.804646	0.857233	-	Gastrectomy	5.02315
Actinobacillus ureae	0.806055	0.857233	-	Gastrectomy	0.247244	GastricAcidMed+ (0.003447)
Mitsuokella multacida	0.831029	0.8803	-	Control	-1.7174
Escherichia albertii	0.846617	0.893281	-	Control	-5.84519
Shigella sp. D9	0.850233	0.893578	-	Control	-5.10895
f. Species relative abundance that might be affected by confounding factors
Species	confounder	associations coefficient
		crude	adjusted	Crude - adjusted	with counfounder
Roseburia hominis	BMI	-0.0314879	-0.025294	0.00619391	-0.0043824
Ruminococcus gnavus	BMI	0.0702274	0.0597628	0.0104646	0.00864003
Notes
FC: Fold Change
FDR: P corrected value by Benjamini-Hochberg (BH) False Discovery Rate (FDR) analysis
LDA: Linear Discriminant Analysis
LEfSe: LDA effect size
Significantly different features
Features that were confirmed significant in two annotations methods
*Demographic information associated with the features and its association coefficient
**The demographic information were taken into account in calculating the features association with the patients group by MaAsLin (Control and Gastrectomy)
**The association coefficien will be displayed if the MaAsLin results consisten to the LEfSe result
**The coefficient were adjusted by possible confounder (BMI, total cholesterol, diabetes medications, and gastric acids medications, gender, age)
+positive association; -negative association
	the differences between crude and adjusted coefficient were more than 10%
